# Supplementary material for: Response strategies for promoting gender equality in public health emergencies: a rapid scoping review
Source: PubMed Central journal article supplement — BMJ Open. 2021 Aug 11;11(8):e048292. doi: 10.1136/bmjopen-2020-048292 (PMC8361708; doi:10.1136/bmjopen-2020-048292), 2021-08-11
Supplement: bmjopen-2020-048292.draft_revisions.pdf [file bmjopen-2020-048292.draft_revisions.pdf]

# BMJ Open

BMJ Open is committed to open peer review. As part of this commitment we make the peer review history of every article we publish publicly available.

When an article is published we post the peer reviewers' comments and the authors' responses online. We also post the versions of the paper that were used during peer review. These are the versions that the peer review comments apply to.

The versions of the paper that follow are the versions that were submitted during the peer review process. They are not the versions of record or the final published versions. They should not be cited or distributed as the published version of this manuscript.

BMJ Open is an open access journal and the full, final, typeset and author-corrected version of record of the manuscript is available on our site with no access controls, subscription charges or pay-per-view fees (<http://bmjopen.bmj.com>).

If you have any questions on BMJ Open's open peer review process please email [info.bmjopen@bmj.com](mailto:info.bmjopen@bmj.com)

# BMJ Open

## Response Strategies for Promoting Gender Equity in Public Health Emergencies: A Rapid Evidence Assessment

|                               |                                                                                                                                                                                                                                                                                                                                                                                                                                                                                                                                                                                                                                        |
|-------------------------------|----------------------------------------------------------------------------------------------------------------------------------------------------------------------------------------------------------------------------------------------------------------------------------------------------------------------------------------------------------------------------------------------------------------------------------------------------------------------------------------------------------------------------------------------------------------------------------------------------------------------------------------|
| Journal:                      | <i>BMJ Open</i>                                                                                                                                                                                                                                                                                                                                                                                                                                                                                                                                                                                                                        |
| Manuscript ID                 | bmjopen-2020-048292                                                                                                                                                                                                                                                                                                                                                                                                                                                                                                                                                                                                                    |
| Article Type:                 | Original research                                                                                                                                                                                                                                                                                                                                                                                                                                                                                                                                                                                                                      |
| Date Submitted by the Author: | 22-Dec-2020                                                                                                                                                                                                                                                                                                                                                                                                                                                                                                                                                                                                                            |
| Complete List of Authors:     | Steinert, Janina; Technical University of Munich, TUM School of Governance; University of Oxford, Department of Social Policy and Intervention<br>Alacevich, Caterina; University of Oxford, Nuffield Department of Primary Care Health Sciences<br>Steele, Bridget; University of Oxford, Department of Social Policy and Intervention<br>Hennegan, Julie; University of Melbourne, Melbourne School of Population and Global Health; Burnet Institute, Maternal, Child and Adolescent Health Program<br>Yakubovich, Alexa; University of Toronto, MAP Centre for Urban Health Solutions, St Michael's Hospital, Unity Health Toronto |
| Keywords:                     | COVID-19, Public health < INFECTIOUS DISEASES, HEALTH ECONOMICS, Health policy < HEALTH SERVICES ADMINISTRATION & MANAGEMENT                                                                                                                                                                                                                                                                                                                                                                                                                                                                                                           |
|                               |                                                                                                                                                                                                                                                                                                                                                                                                                                                                                                                                                                                                                                        |

SCHOLARONE™  
Manuscripts

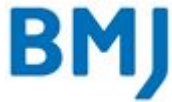

I, the Submitting Author has the right to grant and does grant on behalf of all authors of the Work (as defined in the below author licence), an exclusive licence and/or a non-exclusive licence for contributions from authors who are: i) UK Crown employees; ii) where BMJ has agreed a CC-BY licence shall apply, and/or iii) in accordance with the terms applicable for US Federal Government officers or employees acting as part of their official duties; on a worldwide, perpetual, irrevocable, royalty-free basis to BMJ Publishing Group Ltd ("BMJ") its licensees and where the relevant Journal is co-owned by BMJ to the co-owners of the Journal, to publish the Work in this journal and any other BMJ products and to exploit all rights, as set out in our [licence](#).

The Submitting Author accepts and understands that any supply made under these terms is made by BMJ to the Submitting Author unless you are acting as an employee on behalf of your employer or a postgraduate student of an affiliated institution which is paying any applicable article publishing charge ("APC") for Open Access articles. Where the Submitting Author wishes to make the Work available on an Open Access basis (and intends to pay the relevant APC), the terms of reuse of such Open Access shall be governed by a Creative Commons licence – details of these licences and which [Creative Commons](#) licence will apply to this Work are set out in our licence referred to above.

Other than as permitted in any relevant BMJ Author's Self Archiving Policies, I confirm this Work has not been accepted for publication elsewhere, is not being considered for publication elsewhere and does not duplicate material already published. I confirm all authors consent to publication of this Work and authorise the granting of this licence.

1  
2  
3  
4  
5  
6  
7  
8  
9  
10  
11  
12  
13  
14  
15  
16  
17  
18  
19  
20  
21  
22  
23  
24  
25  
26  
27  
28  
29  
30  
31  
32  
33  
34  
35  
36  
37  
38  
39  
40  
41  
42  
43  
44  
45  
46  
47  
48  
49  
50  
51  
52  
53  
54  
55  
56  
57  
58  
59  
60

## Response Strategies for Promoting Gender Equity in Public Health Emergencies: A Rapid Evidence Assessment

**Janina Isabel Steinert\***, Technical University of Munich (Germany) & Department of Social Policy and Intervention, University of Oxford (UK);

**Caterina Alacevich**, Nuffield Department of Primary Care Health Sciences, CHSEO, University of Oxford (UK);

**Bridget Steele**, Department of Social Policy and Intervention, University of Oxford (UK);

**Julie Hennegan**, Maternal, Child and Adolescent Health Program, Burnet Institute, Melbourne, VIC (Australia) & Melbourne School of Population and Global Health, University of Melbourne, VIC (Australia);

**Alexa Yakubovich**, MAP Centre for Urban Health Solutions, St Michael's Hospital, Unity Health Toronto & University of Toronto (Canada)

*\*Corresponding author*  
*Richard-Wagner Str. 1*  
*80333 München, Germany*  
[Janina.steinert@tum.de](mailto:Janina.steinert@tum.de)

### Abstract

**Objectives:** The COVID-19 pandemic threatens to widen existing gender inequities worldwide. A growing body of literature assesses the harmful consequences of public health emergencies for women and girls; however, evidence of what works to alleviate such impacts is limited. To inform viable mitigation strategies, we conducted a rapid review of evaluative evidence on gender-based uptake and effects of interventions implemented in previous public health emergencies, including disease outbreaks and natural disasters.

**Methods:** We retrieved 14,097 records through systematic searches of MEDLINE, Global Health, and Web of Science. Twelve studies met our eligibility criteria. These included experimental (2), cohort (1), case-control (3), and cross-sectional (6) studies conducted in the context of natural disasters (earthquakes, droughts, storms) or pandemics (Zika, Ebola). Interventions included economic empowerment programmes (5), health promotion, largely focused on reproductive health (6), and a post-earthquake resettlement programme (1).

**Results:** Included studies assessed gender-based impacts of interventions in the domains of sexual and reproductive health, equal opportunities, access to economic resources, violence, and health. There was a dearth of evidence for other outcome domains relevant to gender equity such as harmful practices, sanitation and hygiene management, workplace discrimination, and unpaid work. Economic empowerment interventions showed promise in promoting women's and girls' economic and educational opportunities as well as their sexual and reproductive health during

public health emergencies. However, some programme beneficiaries may be at risk of experiencing unintended harms such as an increase in domestic violence. Focused reproductive health promotion was also an effective strategy for supporting women's sexual and reproductive health.

**Conclusions:** This study identified critical evidence gaps to guide future research on approaches to alleviating gender inequities in the wake of public health emergencies. We further highlight that interventions to promote gender equity in PHEs should take into account possible harmful side effects such as increased gender-based violence.

**Review Registration:** DOI 10.17605/OSF.IO/8HKFD.

### **Strengths and limitations of this study**

- Public health emergencies have the potential to increase gender inequalities. This is the first comprehensive synthesis to assess what works to prevent or mitigate these impacts.
- This review finds that economic empowerment interventions and reproductive health promotion can positively impact gender equality indicators related to sexual and reproductive health, education, and economic opportunities
- This review identifies important evidence gaps in terms of how to effectively promote gender equality in the domains of harmful practices, sanitation and hygiene management, workplace discrimination, and unpaid work during public health emergencies
- Some well-intended interventions may have harmful impacts on women and girls, which necessitates careful monitoring of programmes that are delivered in the context of public health emergencies
- More research on how to promote gender equity during the current COVID-19 pandemic and in future public health emergencies is urgently needed

## **1. Introduction**

To date, the COVID-19 pandemic has resulted in more than 1.5 million deaths worldwide and has caused devastating socioeconomic disruptions.[1] Emerging evidence shows that women and girls are likely to bear the brunt of the socioeconomic impacts of the pandemic, and that COVID-19 has the potential to exacerbate existing gender inequalities.[2–4] In light of this concern, this review aimed to identify intervention and policy strategies that can advance gender-equitable outcomes in the wake of public health emergencies (PHEs). Given that the COVID-19 pandemic is currently ongoing, we adopted a broad perspective by drawing on scientific evidence from previous PHEs, including disease outbreaks, epidemics, pandemics, and natural disasters.[5]

1  
2  
3 The UN Sustainable Development Goal 5 (SDG5) aims to “Achieve gender equality and empower  
4 all women and girls”. SDG5 defines gender (in)equality according to different domains, including  
5 violence against women, access to sexual and reproductive health, access to water, sanitation, and  
6 hygiene, educational and economic opportunities, exposure to harmful practices, as well as care  
7 and domestic work. A growing body of literature demonstrates the links between PHEs and gender  
8 inequities across these domains. First, existing studies point to a rise in violence against women  
9 and girls in the wake of PHEs.[3,6–8] Empirical research has documented a higher prevalence of  
10 physical and sexual violence against women during the Ebola crisis in Sierra Leone, Liberia, and  
11 the Gambia.[9–12] Recent studies suggest that women and children were exposed to an increased  
12 risk of family violence during the COVID-19 lockdown.[13–17] Plausible mechanisms include  
13 increased environmental and interpersonal stressors (e.g., greater economic instability), the need  
14 to shelter in place with abusive partners or family members, and barriers in accessing services or  
15 social support.[18,19]

16  
17 Evidence from past PHEs has also highlighted detrimental impacts on women’s sexual and  
18 reproductive health, largely as a result of the diversion of scarce healthcare resources and personnel  
19 to the immediate emergency response.[20–22] These include excess rates of miscarriages during  
20 the 1918 influenza,[23] higher odds of pregnancy-related mortality during the SARS and MERS  
21 epidemics[24], and excess maternal, neonatal, and stillbirth deaths due to major cuts in antenatal  
22 care coverage.[21] The COVID-19 pandemic has caused major disruptions in the supply chains for  
23 modern contraceptives in some low-income countries,[25] which may elevate the risk of teenage  
24 pregnancies. Relatedly, during the Ebola crisis in West Africa, the rate of teenage pregnancies  
25 increased by 65-75%.[26]

26  
27 Further, PHEs can disrupt water, sanitation and hygiene (WASH) services including the failure of  
28 maintenance or supply systems,[27] and restrict access and availability of hygiene products such  
29 as soap and menstrual materials. Inadequate access to private, safe, and clean WASH facilities can  
30

1  
2  
3 expose women to physical discomfort, shame and stigmatisation while menstruating,[28] and  
4 constrain disease prevention efforts altogether.[29] A lack of basic services can also mean that  
5  
6 women have to travel long distances to fetch water, which increases women's unpaid workload  
7  
8 while reducing the time spent on learning or income generation.[30]  
9

10  
11  
12  
13 Particularly in low-resource settings, PHEs can thwart girls' educational opportunities and make  
14  
15 them more vulnerable to harmful practices such as child marriage. In Sierra Leone, for instance,  
16  
17 the school enrolment rate of girls dropped by 16 percentage points post-Ebola.[31] School closures  
18  
19 that were implemented to contain the spread of the coronavirus have affected more than 800 million  
20  
21 girls to date.[32] There has been growing concern that this policy may ultimately widen gender  
22  
23 gaps in education due to a higher load of household chores and caregiving work being assigned to  
24  
25 girls, preventing them from studying.[32] In addition, as PHEs can put enormous economic strains  
26  
27 on low-income households, marrying off a daughter to receive a brideprice can become a survival  
28  
29 strategy for some families. For instance, Corno and colleagues (2020) found that in Sub-Saharan  
30  
31 Africa, girls aged 12-17 years had a significantly higher likelihood of getting married if their  
32  
33 household was affected by a drought.[33]  
34  
35  
36  
37  
38

39 In addition, in high- and low-income countries alike, women may face an increased informal care  
40  
41 burden in the context of PHEs, either to look after family members who need daily assistance or  
42  
43 who have fallen sick,[34] or to look after their children,[35] as was the case during the COVID-19  
44  
45 lockdowns.[4] Increased care responsibility can thwart women's employment opportunities and  
46  
47 amplify pre-existing biases in couples' division of paid and unpaid work.[36] For instance, Sevilla  
48  
49 and Smith (2020) found that during the first COVID-19 infection wave in the UK mothers were  
50  
51 taking a substantially larger share of the additional childcare hours per week compared to  
52  
53 fathers.[37] In addition, International Labour Organization (2020) estimates suggest that during the  
54  
55 first months of the COVID-19 pandemic, informal workers across the world were facing an average  
56  
57  
58  
59  
60

1  
2  
3 60% cut in their incomes.[38] Given that the informal sector employs disproportionately more  
4  
5 women than men,[39] this has made women particularly vulnerable to loss of livelihoods.[30]  
6  
7

8  
9 Lastly, the COVID-19 pandemic may disproportionately affect women's health risks. Although  
10  
11 epidemiological evidence suggests that the COVID-19 infection and death rate is higher among  
12  
13 men (Williamson et al., 2020), women make up 70% of the global frontline health workforce and  
14  
15 may thus face a higher risk of contracting the virus.[40–43]  
16  
17

18  
19 In light of this evidence, it is clear that PHEs are not gender-neutral. Applying a gender lens to  
20  
21 interventions and policies implemented in the wake of PHEs is therefore crucial. Despite the  
22  
23 expansive literature on the detrimental effects of PHEs on women and girls, systematic evidence  
24  
25 regarding which interventions can mitigate these impacts to date is scarce. To inform viable  
26  
27 response strategies, we conducted a rapid review of the existing evidence on the relationship  
28  
29 between interventions implemented in past PHEs and gender equality goals. To our knowledge,  
30  
31 this is the first comprehensive synthesis of the literature on the uptake, mechanisms, and effects of  
32  
33 PHE response programmes across the domains of gender equality.  
34  
35  
36  
37  
38  
39

## 40 **2. Methods**

41  
42  
43 A review protocol specifying the search strategy and eligibility criteria was published via the Open  
44  
45 Science Foundation on 24 April 2020 (DOI 10.17605/OSF.IO/8HKFD). Our search and synthesis  
46  
47 strategies were based on rapid review guidelines.[44]  
48  
49  
50  
51

### 52 **2.1 Search strategy**

53  
54 We searched for published studies describing interventions and policies implemented in the context  
55  
56 of PHEs that aimed to reduce gender inequality. We selected major health and social sciences  
57  
58 databases to reflect the cross-disciplinary nature of the topic. We searched MEDLINE, Global  
59  
60



1  
2  
3 Health, and Web of Science between 28 April and 7 May 2020. Search terms were in English and  
4  
5 categorised according to the concepts of (i) PHEs, (ii) outcomes related to gender (in)equality, and  
6  
7 (iii) interventions (see Appendix 1 for our search strategy). We hand-searched references of  
8  
9 identified literature reviews for additional eligible studies.  
10  
11  
12  
13

## 14 **2.2 Inclusion criteria**

15  
16 Studies were eligible if they reported on a gender-based intervention, policy, or response strategy  
17  
18 that was implemented in the context of a PHE. We defined PHEs as situations in which an imminent  
19  
20 threat of harm to public health necessitates immediate and non-routine action, including disease  
21  
22 outbreaks, epidemics, pandemics (e.g., SARS, Zika, Ebola, etc.) or natural disasters (e.g.,  
23  
24 earthquakes, tsunamis, flooding, etc.).[5,45,46] We excluded the HIV/AIDS pandemic, endemic  
25  
26 diseases (e.g., malaria), and human-made events (e.g., the opioid crisis, humanitarian conflicts,  
27  
28 terrorism), as we understood these to involve different mechanisms of impact requiring unique  
29  
30 intervention and policy strategies. We also excluded vaccination and immunisation programmes as  
31  
32 these interventions cannot be adequately transferred to the context of other PHEs.  
33  
34  
35  
36  
37

38  
39 Our inclusion criteria required that studies reported on either gendered predictors of uptake of and  
40  
41 engagement with an active intervention or assessed programme effects on an outcome related to  
42  
43 gender (in)equality. To define these outcomes, we drew on the targets of the SDGs, specifically  
44  
45 SDG5 on gender equality and other gender-relevant SDG targets (SDG3: Health, SDG4:  
46  
47 Education, SDG6: Water, Sanitation and Hygiene) (see Box 1 for our outcomes framework).  
48  
49

50  
51 This review excluded qualitative studies but did not apply any other inclusion restrictions with  
52  
53 regards to the research design, considering that it might be unethical or unfeasible to conduct a  
54  
55 randomised controlled trial in the wake of a PHE. No restrictions were made in terms of geographic  
56  
57 setting of the intervention, participants' age, or publication date.  
58  
59  
60

- Discrimination of women and girls (e.g., legal frameworks to promote non-discrimination, enacted/perceived gender attitudes/norms) (*SDG 5.1*)
- Violence against women and girls (e.g., psychological, physical, sexual violence by an intimate partner or other person) (*SDG 5.2*)
- Harmful practices (e.g., forced marriage, child marriage) (*SDG 5.3*)
- Recognition of unpaid domestic work and shared responsibility of domestic burdens (*SDG 5.4*)
- Equal opportunities in political, economic, and public life (e.g. girls' school enrolment rates, share of women in political/economic leadership roles) (*SDG 5.5, SDG 4.5*)
- Women's and girls' sexual and reproductive health (e.g., incidence of teenage pregnancies, use of modern contraceptives) (*SDG 5.6, SDG3.7*)
- Maternal health (*SDG 3.1*)
- Equal rights to economic resources (e.g., proportion of women in formal employment, access to financial services) (*SDG 5.a*)
- Women's and girls' access to information and communication technologies (*SDG 5.b*)
- Access to water, sanitation, and hygiene (WASH) for women and girls' specific health needs (e.g., women's access to menstrual health and hygiene resources, etc.) (*SDG 6.2*)

Box 1. Gender Equality Outcome Framework

### 2.3 Study screening and data extraction

After removing duplicates, we screened titles and abstracts. We first independently piloted our screening criteria on 200 records. Once we established 100% consistency in our decisions, we divided the remaining records among all authors. We followed a similar process for full-text screening: we independently piloted 10% of all potentially eligible studies to establish consistency, then we divided screening among four authors. We extracted data from included studies using a piloted Excel form, including (i) type and country of PHE, (ii) description of the intervention, (iii) target population and sample size, (iv) research design, and (v) gender-related outcomes.

### 2.4 Data synthesis

We did not conduct a meta-analysis given the heterogeneity of included studies. Instead, we graphically synthesised data by categorising studies according to intervention type and mapped these against our gender inequality outcomes framework. We synthesised these data across three aspects of interventions drawing on the Medical Research Council (MRC) framework for

1  
2  
3 evaluating complex interventions: (i) uptake and reach of the intervention, (ii) implementation  
4 process of the intervention (e.g., participant engagement and attendance), and (iii) intervention  
5 effects.[47] We classified intervention effects as *positive* (+) if estimates suggested that the  
6 intervention may promote gender equity, *negative* (-) if estimates suggested that the intervention  
7 may perpetuate gender inequities, and *neutral* (0) if estimates were not conclusive (i.e., a mix of  
8 positive, negative, or null results). We made these determinations based on the direction and size  
9 of the point estimate and variability of the interval estimate, wherever available, as opposed to  
10 relying solely on statistical significance, in line with current best practice.[48,49] We did not utilise  
11 a formal risk of bias tool due to large variations in the included research designs. Instead, we  
12 critically appraised the quality of included studies according to the suitability of the research design  
13 for the research question, the representativeness of the sample, the quality of the measurement  
14 procedures, and the transparency and rigour of the applied statistical analyses.  
15  
16  
17  
18  
19  
20  
21  
22  
23  
24  
25  
26  
27  
28  
29  
30  
31  
32  
33

## 34 **2.5 Patient and public involvement**

35  
36 Patients (or in our case: emergency-affected populations) were not involved at the design or  
37 analysis stage of this study because we exclusively relied on secondary data from previously  
38 published articles. However, we intend to present results to relevant populations to involve them  
39 in the interpretation and dissemination of our research finding as well as involve them in designing  
40 questions to ask in future studies.  
41  
42  
43  
44  
45  
46  
47  
48  
49  
50  
51  
52  
53  
54  
55  
56  
57  
58  
59  
60

### 3. Results

#### 3.1 Included Studies

The database search returned 10,575 unique articles after deduplication (see Figure 1). We excluded 10,280 studies after screening titles and abstracts. After screening 295 full texts, we excluded 280 because they reported on ineligible interventions (71%), were qualitative (17%), were not implemented in the context of a PHE (6%), did not include gender-related outcomes (4%), or could not be retrieved in full text (2%). Fifteen papers met the inclusion criteria, of which three reported on the same intervention, thus resulting in 12 stand-alone studies.

[please insert Figure 1 about here]

#### 3.2 Characteristics of included studies

##### 3.2.1 Geographic setting and PHE

Table 1 presents an overview of the twelve included studies. The majority of studies were carried out in low- and middle-income countries, namely in Bangladesh (1), Ethiopia (2), India (2), Iran (1), Sierra Leone (1), and Nepal (1); two studies were carried out in the US and three studies in Puerto Rico. Eight studies were implemented in the wake of natural disasters, including storms (3), flooding (2), droughts (2), and earthquakes (2). The remaining studies reported on interventions carried out in the context of epidemics, namely Ebola (1) and Zika (3). Sample sizes varied considerably between studies, ranging from 200 female Tsunami survivors[50] to evaluations using administrative data for 29,221 women who received a reproductive health training programme in response to the Zika epidemic.[51–53]

##### 3.2.2 Intervention types

The included studies covered interventions that can be broadly categorised into three types (see Figure 2). Five studies assessed *economic empowerment interventions*: three studies reported on

1  
2  
3 microfinance interventions and financial aid[54–56] and one study evaluated uptake of a food aid  
4 programme implemented in response to several major droughts in Ethiopia.[57] The fifth study,  
5  
6 by Bandiera et al. (2019), assessed the impact of a multi-component intervention targeted at young  
7  
8 women and girls (aged 12-25 years) in the context of Ebola, featuring training on financial literacy  
9  
10 and vocational skills, access to microfinance, and other non-economic programme  
11  
12 components.[31]  
13  
14  
15

16  
17 The second broad intervention category was *health promotion programmes*, assessed in six studies.  
18  
19 The majority of these programmes were focused on promoting women’s reproductive health. One  
20  
21 study described the “New Orleans Healthy Start” programme that was implemented in the wake of  
22  
23 Hurricane Katrina and aimed to improve prenatal care for pregnant women in communities with  
24  
25 high infant mortality rates.[58] Another study reported on a community-based health promotion  
26  
27 intervention to expand access to health care for Nepalese mothers that were severely affected by  
28  
29 the 2015 earthquake.[59] Three studies reported on Zika-focused interventions, including: (i)  
30  
31 reproductive health training and counselling,[60–63] (ii) training of healthcare providers to  
32  
33 increase the quality of contraceptive service provision,[61–63], and (iii) building of community  
34  
35 awareness through a mass media campaign and distribution of Zika prevention kits.[64] Only one  
36  
37 of the health promotion interventions was not focused on reproductive health but evaluated a  
38  
39 psychosocial care programme for female survivors of the Tsunami in India.[65]  
40  
41  
42  
43  
44  
45

46 A final study reported on a unique intervention that fell in neither of the above two categories: a  
47  
48 post-disaster resettlement programme implemented in response to the Manjil earthquake in Iran,  
49  
50 which involved the relocation and integration of some hard-hit villages to nearby locations.[66]  
51  
52

53  
54 *[Please insert Table 1 about here]*  
55

56  
57 *[Please insert Figure 2 about here]*  
58  
59  
60

### 3.2.3 Gender equality outcomes

Figure 2 displays the different outcome measures that were captured by included studies (see also Table 1 for detailed information from each study). The figure highlights important gaps: several outcome domains remain fully unaddressed in the context of PHEs, including: (i) harmful practices such as child marriage, (ii) water, sanitation, and hygiene management, (iii) unpaid work, (iv) women's social discrimination, and (v) women's access to information technology. It is further noteworthy that most assessed interventions (with the exception of Bandiera et al., 2019)[31] only targeted one gender equality domain.

The majority of included studies evaluated outcomes related to sexual and reproductive health: (i) (teenage) pregnancy, (ii) access to and use of modern contraceptives, (iii) sexual risk behaviours (e.g., unprotected, age-disparate sex, transactional sex), (iv) access to and satisfaction with prenatal care, and (v) reproductive healthcare counselling.

Three studies assessed aspects of health equity, including sex-disaggregated malnutrition indicators and receipt of food aid,[67] women's psychological distress,[65] and women's adoption of preventative health behaviours.[64] Two studies reported on dimensions of equal opportunities, specifically capturing girls' school enrolment, their numeracy and literacy levels, and the engagement of school-aged girls in income generation activities (which can hamper their educational achievements),[31] as well as women's civic and political engagement.[68] Lastly, two studies assessed interventions on women's access to economic resources, specifically food aid membership uptake,[57] female employment,[66] and girl's financial literacy and entrepreneurial confidence,[31] and two studies focused on gender-based violence.[31,56]

### 3.3 Programme uptake, implementation, and effects

#### *Economic empowerment*

The identified economic empowerment interventions sought to promote gender equality in five outcome domains: (i) gender-based violence, (ii) equal opportunities, (iii) reproductive health, (iv) access to economic resources, and (v) health equity (see Figure 2).

Azadi and colleagues (2017) assessed the uptake of a food aid programme among 479 residents in Tigray, Northern Ethiopia.[57] The authors reported higher membership rates among women, with 55% of female respondents receiving food aid compared to 46% of male respondents. However, it remains unclear whether the differences in uptake were due to higher programme uptake among women or due to a higher baseline level of food insecurity among women. Because the study did not specify membership criteria or how households and individuals were sampled, the estimated uptake may be due to selection bias rather than reflecting true membership differences between men and women. The study did not examine impacts of the programme on food security or wider aspects of women's economic wellbeing.

The "Empowerment and Livelihood for Adolescents" (ELA) intervention implemented in Sierra Leone was successful in alleviating some of the negative impacts that the Ebola crisis had on girl's equal opportunities: in treatment villages, 8% of girls (aged 12-25 years) had dropped out of school, compared to 16% in control villages. Likewise, literacy and numeracy levels were higher for girls in treatment villages.[31] Further, the rate of girls engaged in child labour in the aftermath of the Ebola epidemic rose by 6% in treatment villages compared to 20% in control villages. The ELA intervention also generated beneficial impacts on reproductive health outcomes, including increases in girls' condom use and a decrease in out-of-wedlock pregnancies. However, strikingly, the authors reveal *harmful* intervention effects on violence-related outcomes for the older age group. For the ELA intervention, the authors observe an increase in the prevalence of unwanted sex (by 5.3 percentage points) and transactional sex (by 5.4 percentage points) among women aged

1  
2  
3 18-25 years in villages that experienced high disruption due to the Ebola crisis, compared to women  
4  
5 in control villages. [31]  
6  
7

8 Christian and colleagues (2018) assessed whether the “Odisha Rural Livelihoods Program”,  
9  
10 consisting of self-help microcredit networks, mitigated some of the devastating economic impacts  
11  
12 of the cyclone in Bengal, India. The analysis revealed the programme had no impact on household’s  
13  
14 food expenditures but may have partly cushioned some of the cyclone’s negative effects on  
15  
16 household expenditures. Specifically, women who participated in the self-help groups experienced  
17  
18 smaller reductions in expenditures on women’s and children’s goods-. Post-cyclone civic and  
19  
20 political engagement did not differ for women who were part of the microcredit network.[54]  
21  
22  
23

24  
25 The microfinance programme in Ethiopia evaluated by Doocy and colleagues (2015) showed  
26  
27 improvements in health equity in the context of droughts. Specifically, the odds of acute  
28  
29 malnourishment among women in control communities were three times as high (95% CI: 1.1–9.8)  
30  
31 compared to the odds of women who were established microfinance clients. The authors also note  
32  
33 that the programme appeared to benefit female clients more than male clients. The likelihood that  
34  
35 male clients had received food aid in the past year was twice as high relative to female clients, thus  
36  
37 suggesting that the microfinance intervention substantially reduced women’s vulnerability to  
38  
39 drought and food insecurity.[55]  
40  
41  
42  
43

44 Lastly, Shahriara and colleagues (2019) analysed uptake of a microcredit programme targeted at  
45  
46 low-income women in Bangladesh. The authors surveyed women who were first-time loan  
47  
48 recipients and found that, among all women, experiencing domestic violence was associated with  
49  
50 lower odds of initiating a new business venture via reduced entrepreneurial self-efficacy and fear  
51  
52 of business failure. The authors further found that the magnitude of these associations was larger  
53  
54 for women who had recently experienced a PHE (flood, river bank erosion, or cyclone in the last  
55  
56 12 months) compared to those who had not. The authors concluded therefore that the negative  
57  
58 impacts of domestic violence on women’s entrepreneurial activities (i.e., their usage of the  
59  
60



1  
2  
3 microloan) were exacerbated by environmental disasters. However, it should be noted that the  
4  
5 authors did not provide the results of a direct comparison of these differential associations (i.e., the  
6  
7 interaction effect), limiting inferences around the magnitude of the differences by PHE  
8  
9 exposure.[56]  
10  
11  
12  
13  
14  
15

### 16 ***Health promotion***

17  
18 Apart from one, all health promotion interventions that we identified were focused on the domain  
19  
20 of sexual and reproductive health. A community engagement health promotion intervention in  
21  
22 Nepal resulted in improvements in women's maternal health knowledge and healthcare seeking  
23  
24 behaviour. For instance, the rate of institutional deliveries as well as antenatal care visits was higher  
25  
26 among mothers sampled post-intervention than in the group sampled before the intervention.[59]  
27  
28 It has to be noted, however, that the analysis relied on two different samples at baseline and follow-  
29  
30 up., whereby the latter sample had a higher proportion of mothers who scored better on a wealth  
31  
32 index, which may have biased these comparisons.  
33  
34  
35  
36

37  
38 Three studies targeted reproductive health in the context of the Zika epidemic. Earle-Richardson  
39  
40 et al. (2018) reported an assessment of four different interventions strategies to increase Zika  
41  
42 prevention behaviours, including personal and home protection behaviours.[64] The study found  
43  
44 mixed results for the interventions which included a Zika orientation, the provision of prevention  
45  
46 kits, a public awareness campaign and an offer of free residential mosquito spraying services.  
47  
48 Personal protective behaviours including bed net, mosquito repellent and condom use were  
49  
50 increased by exposure to interventions, while the offer of free spraying increased home or yard  
51  
52 spraying but not other home protection behaviours. Exposure to the different interventions varied,  
53  
54 with 93% of pregnant women surveyed reporting exposure to orientation, 75% to kit distribution,  
55  
56 51% to the awareness campaign, and 68% to free residential spraying. The reproductive health  
57  
58 training delivered to women with a recent live birth in Puerto Rico resulted in higher condom use  
59  
60

1  
2  
3 during pregnancy among women who had received prenatal provider counselling for Zika virus  
4 infection prevention.[60] The Zika Contraception Access Network was successful in reaching large  
5  
6 populations of women with modern contraceptive (long active reversible contraceptive (LARC))  
7  
8 methods and social media health communication, securing a high level of user satisfaction and  
9  
10 access to LARC removal.[61–63]  
11  
12  
13  
14

15 The “New Orleans Healthy Start” prenatal care programme, delivered in the wake of Hurricane  
16 Katrina, showed evidence of successful implementation: a greater proportion of pregnant women  
17 who engaged in the programme reported learning about each of 11 components of prenatal care  
18 (e.g., smoking) compared to those who accessed traditional prenatal care.[58] These two groups of  
19 women did not differ in their reported satisfaction in their prenatal care (e.g., regarding waiting  
20 time). Women who engaged in the Healthy Start programme were, in general, a higher-risk group,  
21 including reporting worse hurricane experiences and more post-traumatic stress. Giarratano et al.  
22 (2015) did not find evidence of an effect of the Healthy Start programme on a variety of pre- or  
23 post-natal outcomes, from birthweight to gestational diabetes. This was interpreted as a  
24 programmatic success given the higher risk among Healthy Start mothers; however, the study was  
25 designed to identify programme benefits not non-inferiority.[58]  
26  
27  
28  
29  
30  
31  
32  
33  
34  
35  
36  
37  
38  
39  
40

41 A last study evaluated the impact of a psychosocial intervention that was targeted at female  
42 survivors of the tsunami disaster in India.[50] In affected communities, trained community workers  
43 delivered group sessions to female survivors who were encouraged to share their experiences and  
44 learn relaxation exercises. The intervention was associated with reductions in symptoms of  
45 psychological distress. Specifically, women who participated in the programme had 25% lower  
46 scores on the Impact of Event scale compared to women who had not participated.  
47  
48  
49  
50  
51  
52  
53  
54  
55  
56  
57  
58  
59  
60

### ***Resettlement***

The study by Badri and colleagues (2006) evaluated the effects of a planned resettlement programme that was implemented during the reconstruction period after the Manjil earthquake in Iran.[66] Drawing on data collected 11 years after the earthquake, the authors reveal that the resettlement policy hampered employment prospects of women who were hit by the earthquake and forced to relocate to another village. However, it needs to be cautioned that the authors present neither point estimates nor corresponding confidence interval for female employment rates, which makes a more detailed quantitative comparison of women in host communities and women in resettled communities impossible.

### **3.4 Study designs and quality appraisal**

Included studies varied substantially with regard to their research design and methodological approach to data analysis (see Figure 3). Causal inference about the intervention effect was only reliable in two studies, one of which was set up as a cluster randomised controlled trial[31] (Bandiera et al., 2019) and one as a natural experiment, exploiting variation in the intensity with which communities were hit by a cyclone as well as the staggered rollout of a microcredit intervention.[54] Four studies relied on cohort or case-control designs to partly control for systematic variation in exposure to the intervention of interest, and six studies relied on cross-sectional, uncontrolled designs. In five studies, participants were recruited based on random or purposive sampling procedures, whereas the remaining studies relied on convenience sampling or did not provide sufficient information on the sampling procedure. Five studies provided detailed descriptions on the survey instruments, reported on using validation procedures to adapt the questionnaire to the local context and language, or used previously validated psychometric scales. Conversely, in four studies, we judged outcome measures to be susceptible to measurement error, either due to an increased risk of social desirability bias for self-reported behaviours (e.g., condom

1  
2  
3 use) in a face-to-face interview, recall bias (e.g., time use), or failure to use (or report on using)  
4  
5 validated or pre-piloted scales. There was also considerable heterogeneity between studies in terms  
6  
7 of statistical rigour: three studies did not present the corresponding standard deviations, standard  
8  
9 errors, or confidence intervals to their effect estimates and three studies presented only unadjusted  
10  
11 outcome analyses.  
12  
13

14  
15 *[Please insert Figure 3 about here]*  
16  
17

#### 18 **4. Conclusion**

19  
20  
21 In this review, we sought to identify evidence-based strategies for promoting gender equality in the  
22  
23 wake of PHEs. Included interventions positively affected women's and girls' sexual and  
24  
25 reproductive health,[31,59,61–63] educational opportunities,[31] economic welfare,[31] and  
26  
27 health equity in terms of (mal)nutrition.[67] However, in view of the multi-dimensional and  
28  
29 broader detrimental impacts that PHEs can have on female empowerment and on women's societal  
30  
31 status, this review reveals important evidence gaps. Notably, we did not identify any eligible study  
32  
33 on interventions that targeted sanitation and hygiene management, harmful practices (e.g., child  
34  
35 marriage), workplace or other forms of discrimination, or unpaid (care) work. More research on  
36  
37 how to promote gender equity in these domains during PHEs is urgently needed, especially in light  
38  
39 of the ongoing COVID-19 pandemic and its devastating socioeconomic consequences worldwide.  
40  
41 In addition, although the search string was set up to move beyond the gender binary, none of the  
42  
43 identified studies specifically targeted gender diverse and sexual minority participants. Hence,  
44  
45 there is a dearth of evidence on how to effectively protect LGBTQIA\* populations in the context  
46  
47 of PHEs.  
48  
49  
50  
51  
52

53  
54 This review identified two intervention strategies that show promise with regards to promoting  
55  
56 gender inequality during and after PHEs. First, two included evaluations[61–64] presented large-  
57  
58 scale governmental efforts for promoting sexual and reproductive health in the context of the Zika  
59  
60

1  
2  
3 pandemic in Puerto Rico. Such efforts could be scaled-up to other countries and may also be highly  
4 relevant in the context of PHEs other than Zika. In view of the increasing rate of teenage  
5 pregnancies in the aftermath of previous PHEs,[32] ensuring uninterrupted access to modern  
6 contraceptives should be considered one of the key policy priorities. Second, economic  
7 empowerment programmes may be a crucial strategy for securing women's and girls' livelihoods  
8 in emergency settings. The impact of such programmes can go beyond economic aspects and may  
9 also decrease the risk of harmful coping behaviours such as marrying off a young daughter for  
10 receiving a brideprice,[33] selling productive assets,[69] or engaging in risky sexual behaviour.[70]  
11 One of the most widely used and promising tools to cushion the economic shock induced by a PHE  
12 are unconditional cash transfers. A rigorous evidence-base has already been established, suggesting  
13 that unconditional cash transfers, in general, can improve food security, cognitive and physical  
14 child development, and stipulate business activities and educational attainment.[71,72]

15  
16  
17  
18  
19  
20  
21  
22  
23  
24  
25  
26  
27  
28  
29  
30  
31  
32  
33  
34  
35  
36  
37  
38  
39  
40  
41  
42  
43  
44  
45  
46  
47  
48  
49  
50  
51  
52  
53  
54  
55  
56  
57  
58  
59  
60  
The dearth of evidence demonstrated by this review likely reflects the associated risks and  
difficulties of conducting research and collecting data in PHE settings. Yet, our synthesis  
demonstrates that well-intended interventions may sometimes have unintended consequences and  
even induce harm. It is therefore essential that emergency mitigation efforts are accompanied by  
thorough monitoring and evaluation efforts and integrate feedback systems to stop or modify  
(unintended) harmful approaches and improve programme response. Indeed, one of the identified  
interventions reported a significant *increase* in violence against women, at least for some  
programme beneficiaries, post-intervention.[31] This corroborates previous evidence documenting  
that economic empowerment programmes may expose female beneficiaries to a higher risk of  
violence (Buller et al., 2018; Tankard & Iyengar, 2018; Vyas & Watts, 2009). To this end,  
promising mitigation strategies in delivering economic strengthening programmes have included  
adding specific training and awareness raising on gender roles and stereotypes and engaging male  
spouses in these programme components.[73–76] Given the rarity of being able to exploit random

1  
2  
3 variation in PHE settings, these efforts should include, wherever possible, measuring key  
4  
5 confounders of the programme-outcome association (which can be determined in times of non-  
6  
7 emergencies and based on existing literature) as well as using appropriate measurement procedures,  
8  
9 including appropriately trained interviewers, safe and secure data collection and storage, and  
10  
11 validated instruments. While causality is difficult to establish in the absence of experimental  
12  
13 designs, rich qualitative data as well as mixed-methods analyses can help depict the channels  
14  
15 through which a programme may induce improvements in gender equality outcomes.  
16  
17

18  
19 A number of limitations are noteworthy. First, our search strategy was set up with English search  
20  
21 terms only and non-English publications were excluded. This means that our review excludes  
22  
23 evaluations of interventions implemented to reduce gender inequalities in previous PHEs if their  
24  
25 results were published in a language other than English. In addition, in light of the ongoing COVID-  
26  
27 19 pandemic and the immediate demand for evidence-based policy strategies, we prioritised rapid  
28  
29 evidence generation over a more systematic search by focusing only on published studies.  
30  
31 Therefore, it is possible that our review did not capture some eligible programmes that were  
32  
33 available only in grey literature outlets. Lastly, we did not include qualitative data in this review,  
34  
35 and are therefore unable to produce further insights into the mechanisms of change underlying  
36  
37 effective programmes or into the facilitating and inhibiting factors that explain interventions'  
38  
39 success or failure, respectively. This is an important area for future inquiry.  
40  
41  
42  
43  
44  
45  
46

47 The current COVID-19 pandemic with its “triple hit to health, education and income” is projected  
48  
49 to severely slow down progress towards realising the SDGs by 2030.[77] The SDG5 for “Gender  
50  
51 Equality” is no exception, as emphasised by UN Secretary-General António Guterres: “*Limited*  
52  
53 *gains in gender equality and women’s rights made over the decades are in danger of being rolled*  
54  
55 *back due to the COVID-19 pandemic*”.[78] Findings from this review provide preliminary support  
56  
57 for economic empowerment programmes and focused sexual and reproductive health to promote  
58  
59  
60

1  
2  
3 gender equality in the domains of sexual and reproductive health,[31,59,61–63,79] equal  
4 opportunities,[31] and health equity.[65,67] However, this review also uncovers important  
5 evidence gaps across all outcome domains of gender equality, but particularly with regards to the  
6  
7  
8  
9  
10 (i) prevention of harmful practices, (ii) adequate water, sanitation and hygiene management, (iii)  
11 women's time use and care burden, (iv) workplace and other discrimination, and (v) access to  
12 technologies and economic resources. Concerted monitoring and evaluation efforts in PHE settings  
13  
14  
15 are urgently needed to inform responsive and effective policy programmes.  
16  
17  
18  
19  
20

21 **a. Contributorship statement:** JIS, AY, CA and JH conceptualised the study and developed the  
22 review protocol. BS ran the database searches. All authors screened abstracts and titles, and  
23 extracted and analysed the data with feedback from all authors. JIS drafted the first version of the  
24 manuscript and AY, CA, BS, and JH provided substantial revisions and feedback. All authors have  
25 read and approved the final version of the manuscript.  
26  
27  
28

29 **b. Funding:** JIS is supported by the Joachim Herz Foundation. BS is supported by the Social  
30 Sciences and Humanities Research Council of Canada. ARY is supported by the Canadian  
31 Institutes of Health Research (HSI-166388).  
32  
33

34 **c. Competing interests:** The authors have no conflict of interest to disclose.  
35

36 **d. Acknowledgements:** We are grateful for funding from the Joachim Herz Foundation, the Social  
37 Sciences and Humanities Research Council of Canada, and the Canadian Institutes of Health  
38 Research.  
39  
40  
41  
42  
43  
44  
45  
46  
47  
48  
49  
50  
51  
52  
53  
54  
55  
56  
57  
58  
59  
60

## References

- 1 Johns Hopkins University. COVID-19 Dashboard by the Center for Systems Science and Engineering (CSSE). 2020.<https://coronavirus.jhu.edu/map.html>
- 2 Wenham C, Smith J, Morgan R. COVID-19: the gendered impacts of the outbreak. *The Lancet* 2020;**395**:846–8. doi:10.1016/S0140-6736(20)30526-2
- 3 Fraser DE. Impact of COVID-19 Pandemic on Violence against Women and Girls. ;:16.
- 4 Alon T, Doepke M, Olmstead-Rumsey J, *et al.* The Impact of COVID-19 on Gender Equality. University of Bonn and University of Mannheim, Germany 2020. [https://ideas.repec.org/p/bon/boncrc/crctr224\\_2020\\_163.html](https://ideas.repec.org/p/bon/boncrc/crctr224_2020_163.html) (accessed 14 Dec 2020).
- 5 World Health Organization. Glossary of Humanitarian Terms. 2008.<https://www.who.int/hac/about/reliefweb-aug2008.pdf?ua=1>
- 6 Felten-Biermann C. Gender and Natural Disaster: Sexualized violence and the tsunami. *Development* 2006;**49**:82–6.
- 7 Davies SE, Bennett B. A gendered human rights analysis of Ebola and Zika: locating gender in global health emergencies. *International Affairs* 2016;**92**:1041–60. doi:<https://doi.org/10.1111/1468-2346.12704>
- 8 Peterman A, Potts A, O'Donnell M, Thompson K, Shah N, Oertelt-Prigione S & van Gelder N. Pandemics and Violence Against Women and Children. 2020.
- 9 Rao S. A natural disaster and intimate partner violence: Evidence over time. *Social Science & Medicine* 2020;**247**:112804. doi:10.1016/j.socscimed.2020.112804
- 10 First JM, First NL, Houston JB. Intimate partner violence and disasters: A framework for empowering women experiencing violence in disaster settings. *Affilia: Journal of Women & Social Work* 2017;**32**:390–403. doi:10.1177/0886109917706338
- 11 O'Brien M, Tolosa X. The effect of the 2014 West Africa Ebola virus disease epidemic on multi-level violence against women. *International Journal of Human Rights in Healthcare* 2016;**9**:151–60. doi:10.1108/IJHRH-09-2015-0027
- 12 Karamouzian M, Hategekimana C. Ebola treatment and prevention are not the only battles: understanding Ebola-related fear and stigma. *Int J Health Policy Manag* 2014;**4**:55–6. doi:10.15171/ijhpm.2014.128
- 13 Armbruster S, Klotzbücher V. Lost in lockdown? COVID-19, social distancing, and mental health in Germany. *Diskussionsbeiträge* 2020. <https://www.econstor.eu/handle/10419/218885> (accessed 14 Dec 2020).
- 14 Chandan JS, Taylor J, Bradbury-Jones C, *et al.* COVID-19: a public health approach to manage domestic violence is needed. *Lancet Public Health* Published Online First: 8 May 2020. doi:10.1016/S2468-2667(20)30112-2
- 15 Leslie E, Wilson R. Sheltering in place and domestic violence: Evidence from calls for service during COVID-19. *J Public Econ* 2020;**189**:104241. doi:10.1016/j.jpubeco.2020.104241
- 16 Ravindran S, Shah M. Unintended Consequences of Lockdowns: COVID-19 and the Shadow Pandemic. National Bureau of Economic Research 2020. doi:10.3386/w27562



- 1  
2  
3 17 Peterman, A., & O'Donnell, M. COVID-19 and Violence against Women and Children: A Second  
4 Research Round Up. 2020.  
5  
6 18 Yakubovich AR, Stöckl H, Murray J, *et al.* Risk and Protective Factors for Intimate Partner  
7 Violence Against Women: Systematic Review and Meta-analyses of Prospective-Longitudinal Studies.  
8 *Am J Public Health* 2018;**108**:e1–11. doi:10.2105/AJPH.2018.304428  
9  
10 19 Schneider D, Harknett K, McLanahan S. Intimate Partner Violence in the Great Recession.  
11 *Demography* 2016;**53**:471–505. doi:10.1007/s13524-016-0462-1  
12  
13 20 Hall KS, Samari G, Garbers S, *et al.* Centring sexual and reproductive health and justice in the  
14 global COVID-19 response. *Lancet* 2020;**395**:1175–7. doi:10.1016/S0140-6736(20)30801-1  
15  
16 21 Sochas L, Channon AA, Nam S. Counting indirect crisis-related deaths in the context of a low-  
17 resilience health system: the case of maternal and neonatal health during the Ebola epidemic in Sierra  
18 Leone. *Health Policy Plan* 2017;**32**:iii32–9. doi:10.1093/heapol/czx108  
19  
20 22 McGinn. Reproductive health of war-affected populations: what do we know? *International*  
21 *Family Planning Perspectives* 2000;:174–80.  
22  
23 23 Bloom-Feshbach K, Simonsen L, Viboud C, *et al.* Natality decline and miscarriages associated  
24 with the 1918 influenza pandemic: the Scandinavian and United States experiences. *J Infect Dis*  
25 2011;**204**:1157–64. doi:10.1093/infdis/jir510  
26  
27 24 Wong SF, Chow KM, Leung TN, *et al.* Pregnancy and perinatal outcomes of women with severe  
28 acute respiratory syndrome. *Am J Obstet Gynecol* 2004;**191**:292–7. doi:10.1016/j.ajog.2003.11.019  
29  
30 25 Nanda K, Lebetkin E, Steiner MJ, *et al.* Contraception in the Era of COVID-19. *Glob Health Sci*  
31 *Pract* 2020;**8**:166–8. doi:10.9745/GHSP-D-20-00119  
32  
33 26 Rissa-Gill, I., & Finnegan, L. Children's Ebola Recovery Assessment: Sierra Leone, Save the  
34 Children. 2015.  
35  
36 27 UNICEF. Monitoring and mitigating the secondary impacts of the coronavirus disease (COVID-  
37 19) pandemic on WASH services availability and access.  
38 2020. [https://www.unicef.org/documents/monitoring-and-mitigating-secondary-impacts-coronavirus-](https://www.unicef.org/documents/monitoring-and-mitigating-secondary-impacts-coronavirus-disease-covid-19-pandemic-wash)  
39 [disease-covid-19-pandemic-wash](https://www.unicef.org/documents/monitoring-and-mitigating-secondary-impacts-coronavirus-disease-covid-19-pandemic-wash)  
40  
41  
42 28 Hennegan J, Shannon AK, Rubli J, *et al.* Women's and girls' experiences of menstruation in low-  
43 and middle-income countries: A systematic review and qualitative metasynthesis. *PLOS Medicine*  
44 2019;**16**:e1002803. doi:10.1371/journal.pmed.1002803  
45  
46 29 Fuhrman S, Kalyanpur A, Friedman S, *et al.* Gendered implications of the COVID-19 pandemic  
47 for policies and programmes in humanitarian settings. *BMJ Global Health* 2020;**5**:e002624.  
48 doi:10.1136/bmjgh-2020-002624  
49  
50 30 UN Women. Covid-19 and Violence Against Women and Girls: Addressing the Shadow  
51 Pandemic. 2020.  
52  
53 31 Bandiera O, Buehren N, Goldstein M, *et al.* The economic lives of young women in the time of  
54 Ebola: lessons from an empowerment program. 2019:80.  
55  
56 32 Burzynska K, Contreras G. Gendered effects of school closures during the COVID-19 pandemic.  
57 *Lancet* 2020;**395**:1968. doi:10.1016/S0140-6736(20)31377-5  
58  
59  
60

- 1  
2  
3 33 Corno L, Hildebrandt N, Voena A. Age of Marriage, Weather Shocks, and the Direction of  
4 Marriage Payments. *Econometrica* 2020;**88**:879–915. doi:<https://doi.org/10.3982/ECTA15505>  
5
- 6 34 Fawole OI, Bamiselu OF, Adewuyi PA, *et al.* Gender dimensions to the Ebola outbreak in  
7 Nigeria. *Ann Afr Med* 2016;**15**:7–13. doi:10.4103/1596-3519.172554  
8
- 9 35 Del Boca D, Oggero N, Profeta P, *et al.* Women’s and men’s work, housework and childcare,  
10 before and during COVID-19. *Rev Econ Household* Published Online First: 6 September 2020.  
11 doi:10/ghcrnv  
12
- 13 36 Boca DD, Oggero N, Profeta P, *et al.* Women’s work, housework, and childcare before and during  
14 COVID-19. VoxEU.org. 2020.[https://voxeu.org/article/women-s-work-housework-and-childcare-and-](https://voxeu.org/article/women-s-work-housework-and-childcare-and-during-covid-19)  
15 [during-covid-19](https://voxeu.org/article/women-s-work-housework-and-childcare-and-during-covid-19) (accessed 14 Dec 2020).  
16
- 17 37 Almudena Sevilla, Sarah Smith. Baby Steps: The Gender Division of Childcare during the  
18 COVID-19 Pandemic. 2020.[https://www.iza.org/publications/dp/13302/baby-steps-the-gender-](https://www.iza.org/publications/dp/13302/baby-steps-the-gender-division-of-childcare-during-the-covid-19-pandemic)  
19 [division-of-childcare-during-the-covid-19-pandemic](https://www.iza.org/publications/dp/13302/baby-steps-the-gender-division-of-childcare-during-the-covid-19-pandemic)  
20
- 21 38 International Labour Organisation. Impact of the COVID-19 crisis on loss of jobs and hours  
22 among domestic workers. 2020.  
23
- 24 39 International Labour Organisation. Women and men in the informal economy: a statistical brief.  
25 2019.  
26
- 27 40 Akseer N, Kandru G, Keats EC, *et al.* COVID-19 pandemic and mitigation strategies:  
28 implications for maternal and child health and nutrition. *Am J Clin Nutr* 2020;**112**:251–6.  
29 doi:10.1093/ajcn/nqaa171  
30
- 31 41 Hall KS, Samari G, Garbers S, *et al.* Centring sexual and reproductive health and justice in the  
32 global COVID-19 response. *The Lancet* 2020;**395**:1175–7. doi:10.1016/S0140-6736(20)30801-1  
33
- 34 42 Fawole OI, Bamiselu OF, Adewuyi PA, *et al.* Gender dimensions to the Ebola outbreak in  
35 Nigeria. *Ann Afr Med* 2016;**15**:7–13. doi:10.4103/1596-3519.172554  
36
- 37 43 Boniol M, McIsaac M, Xu L, *et al.* Gender equity in the health workforce: Analysis of 104  
38 countries. ;:8.  
39
- 40 44 Dobbins M. *Rapid review guidebook: steps for conducting a rapid review*. Hamilton, ON:  
41 National Collaborating Centre for Methods and Tools 2017.  
42
- 43 45 Haffajee R, Parmet WE, Mello MM. What Is a Public Health “Emergency”? *New England*  
44 *Journal of Medicine* 2014;**371**:986–8. doi:10.1056/NEJMp1406167  
45
- 46 46 Nelson C, Lurie N, Wasserman J, *et al.* Conceptualizing and Defining Public Health Emergency  
47 Preparedness. *Am J Public Health* 2007;**97**:S9–11. doi:10.2105/AJPH.2007.114496  
48
- 49 47 Craig P, Dieppe P, Macintyre S, *et al.* Developing and evaluating complex interventions: the new  
50 Medical Research Council guidance. *BMJ* 2008;**337**:a1655. doi:10.1136/bmj.a1655  
51
- 52 48 Amrhein V, Greenland S, McShane B. Scientists rise up against statistical significance. *Nature*  
53 2019;**567**:305–7. doi:10.1038/d41586-019-00857-9  
54
- 55 49 Wasserstein RL, Schirm AL, Lazar NA. Moving to a World Beyond “p < 0.05”. *The American*  
56 *Statistician* 2019;**73**:1–19. doi:10.1080/00031305.2019.1583913  
57  
58  
59  
60

- 1  
2  
3 50 Becker SM. Psychosocial Care for Women Survivors of the Tsunami Disaster in India. *Am J*  
4 *Public Health* 2009;**99**:654–8. doi:10.2105/AJPH.2008.146571  
5
- 6 51 Lathrop E, Hurst S, Mendoza Z, *et al.* Final Program Data and Factors Associated With Long-  
7 Acting Reversible Contraception Removal: The Zika Contraception Access Network. *Obstetrics &*  
8 *Gynecology* 2020;**135**:1095–1103. doi:10.1097/AOG.0000000000003835  
9
- 10 52 Lathrop E, Romero L, Hurst S, *et al.* The Zika Contraception Access Network: a feasibility  
11 programme to increase access to contraception in Puerto Rico during the 2016-17 Zika virus outbreak.  
12 *Lancet Public Health* 2018;**3**:e91–9. doi:10.1016/S2468-2667(18)30001-X  
13
- 14 53 Romero L, Koonin LM, Zapata LB, *et al.* Contraception as a Medical Countermeasure to Reduce  
15 Adverse Outcomes Associated With Zika Virus Infection in Puerto Rico: The Zika Contraception  
16 Access Network Program. *Am J Public Health* 2018;**108**:S227–30. doi:10.2105/AJPH.2018.304558  
17
- 18 54 Christian P, Eeshani K, Nethra P, *et al.* Safety nets and natural disaster mitigation: evidence from  
19 cyclone Phailin in Odisha. 2018:30.  
20
- 21 55 Doocy S, Teferra S, Norell D, *et al.* Credit program outcomes: Coping capacity and nutritional  
22 status in the food insecure context of Ethiopia. *SOC SCI MED* 2005;**60**:2371–82.  
23 doi:10.1016/j.socscimed.2004.10.025  
24
- 25 56 Shahriar AM, Shepherd DA. Violence against women and new venture initiation with  
26 microcredit: Self-efficacy, fear of failure, and disaster experiences. *Journal of Business Venturing*  
27 2019;**34**. doi:10.1016/j.jbusvent.2019.06.006  
28
- 29 57 Azadi H, De Rudder F, Vlassenroot K, *et al.* Targeting International Food Aid Programmes: The  
30 Case of Productive Safety Net Programme in Tigray, Ethiopia. *Sustainability* 2017;**9**.  
31 doi:10.3390/su9101716  
32
- 33 58 Giarratano G, Harville EW, de Mendoza VB, *et al.* Healthy Start: Description of a Safety Net for  
34 Perinatal Support during Disaster Recovery. *Matern Child Health J* 2015;**19**:819–27.  
35 doi:10.1007/s10995-014-1579-8  
36
- 37 59 Dhital R, Silwal RC, Simkhada P, *et al.* Assessing knowledge and behavioural changes on  
38 maternal and newborn health among mothers following post-earthquake health promotion in Nepal.  
39 *PloS one* 2019;**14**:e0220191. doi:10.1371/journal.pone.0220191  
40
- 41 60 Essen BS von, Kortsmid K, Warner L, *et al.* Preventing Sexual Transmission of Zika Virus  
42 Infection during Pregnancy, Puerto Rico, USA, 2016 - Volume 25, Number 11—November 2019 -  
43 Emerging Infectious Diseases journal - CDC. doi:10.3201/eid2511.190915  
44
- 45 61 Lathrop E, Hurst S, Mendoza Z, *et al.* Final Program Data and Factors Associated With Long-  
46 Acting Reversible Contraception Removal: The Zika Contraception Access Network. *Obstetrics and*  
47 *gynecology* 2020;**135**:1095–103. doi:10.1097/AOG.0000000000003835  
48
- 49 62 Lathrop E, Romero L, Hurst S, *et al.* The Zika Contraception Access Network: a feasibility  
50 programme to increase access to contraception in Puerto Rico during the 2016-17 Zika virus outbreak.  
51 *Lancet Public Health* 2018;**3**:e91–9. doi:10.1016/S2468-2667(18)30001-X  
52
- 53 63 Romero L, Koonin LM, Zapata LB, *et al.* Contraception as a Medical Countermeasure to Reduce  
54 Adverse Outcomes Associated With Zika Virus Infection in Puerto Rico: The Zika Contraception  
55 Access Network Program. *American journal of public health* 2018;**108**:S227–30.  
56 doi:10.2105/AJPH.2018.304558  
57
- 58  
59  
60

- 1  
2  
3 64 Earle-Richardson G, Prue C, Turay K, *et al.* Influences of community interventions on Zika  
4 prevention behaviors of pregnant women, Puerto Rico, July 2016-June 2017. *Emerging Infectious*  
5 *Diseases* 2018;**24**:2251–61. doi:10.3201/eid2412.181056  
6
- 7 65 Becker SM. Psychosocial care for women survivors of the tsunami disaster in India. *American*  
8 *Journal of Public Health* 2009;**99**:654–8. doi:10.2105/AJPH.2008.146571  
9
- 10 66 Badri SA, Asgary A, Eftekhari AR, *et al.* Post-disaster resettlement, development and change: a  
11 case study of the 1990 Manjil earthquake in Iran. *Disasters* 2006;**30**:451–68.  
12
- 13 67 Doocy S, Teferra S, Norell D, *et al.* Credit program outcomes: coping capacity and nutritional  
14 status in the food insecure context of Ethiopia. *Social Science & Medicine* 2005;**60**:2371–82.  
15 doi:10.1016/j.socscimed.2004.10.025  
16
- 17 68 Christian P, Kandpal E, Palaniswamy N, *et al.* Safety nets and natural disaster mitigation:  
18 evidence from cyclone Phailin in Odisha. *Climatic Change* 2019;**153**:141–64.  
19
- 20 69 Orkin K. The evidence behind putting money directly in the pockets of the poor.  
21 2020. <https://www.ox.ac.uk/news/science-blog/evidence-behind-putting-money-directly-pockets-poor>  
22
- 23 70 Pronyk PM, Hargreaves JR, Kim JC, *et al.* Effect of a structural intervention for the prevention of  
24 intimate-partner violence and HIV in rural South Africa: a cluster randomised trial. *The Lancet*  
25 2006;**368**:1973–83. doi:10.1016/S0140-6736(06)69744-4  
26
- 27 71 Baird S, McKenzie D, Özler B. The effects of cash transfers on adult labor market outcomes. *IZA*  
28 *Journal of Development and Migration* 2018;**8**:22. doi:10.1186/s40176-018-0131-9  
29
- 30 72 Evans DK, Hausladen S, Kosec K, *et al.* Community-Based Conditional Cash Transfers in  
31 Tanzania : Results from a Randomized Trial. The World Bank 2014. [https://ideas.repec.org/cgi-bin/htsearch?ul=&q=%28saving++%7C+micro-saving+%7Cmicrosaving+%7C+Aflatoun+%7C+YouthSafe+%29+%2B+%28%E2%80%9Crandomized+control\\*+trial%E2%80%9D+%7C++%E2%80%9Crandomised+control\\*+trial%E2%80%9D+%7C++randomised+%7C++randomized+%7C++RCT+%7C+++trial+%7C+experiment\\*+%29+&cmd=Search%21&wf=4BFF&s=R&dt=range&db=01%2F01%2F1990&de=&m=all&fmt=long&sy=1&ps=50](https://ideas.repec.org/cgi-bin/htsearch?ul=&q=%28saving++%7C+micro-saving+%7Cmicrosaving+%7C+Aflatoun+%7C+YouthSafe+%29+%2B+%28%E2%80%9Crandomized+control*+trial%E2%80%9D+%7C++%E2%80%9Crandomised+control*+trial%E2%80%9D+%7C++randomised+%7C++randomized+%7C++RCT+%7C+++trial+%7C+experiment*+%29+&cmd=Search%21&wf=4BFF&s=R&dt=range&db=01%2F01%2F1990&de=&m=all&fmt=long&sy=1&ps=50)  
32 (accessed 2 Mar 2016).  
33
- 34 73 Eggers Del Campo I, Steinert JI. The Effect of Female Economic Empowerment Interventions on  
35 the Risk of Intimate Partner Violence: A Systematic Review and Meta-Analysis. *Trauma Violence*  
36 *Abuse* 2020:1524838020976088. doi:10.1177/1524838020976088  
37
- 38 74 Halim N, Steven Mzilangwe E, Reich N, *et al.* Together to end violence against women in  
39 Tanzania: Results of a pilot cluster randomized controlled trial to evaluate preliminary effectiveness of  
40 interpersonal and community level interventions to address intimate partner violence. *Glob Public*  
41 *Health* 2019;**14**:1653–68. doi:10.1080/17441692.2019.1609062  
42
- 43 75 Iyengar R, Ferrari G. *Comparing Economic and Social Interventions to Reduce Intimate Partner*  
44 *Violence: Evidence from Central and Southern Africa*. University of Chicago Press  
45 <https://chicago.universitypressscholarship.com/view/10.7208/chicago/9780226316192.001.0001/upso-9780226316055-chapter-6> (accessed 14 Dec 2020).  
46
- 47 76 Gupta J, Falb KL, Lehmann H, *et al.* Gender norms and economic empowerment intervention to  
48 reduce intimate partner violence against women in rural Côte d'Ivoire: a randomized controlled pilot  
49 study. *BMC Int Health Hum Rights* 2013;**13**:46. doi:10.1186/1472-698X-13-46  
50
- 51 77 Chandan JS, Taylor J, Bradbury-Jones C, *et al.* COVID-19: a public health approach to manage  
52 domestic violence is needed. *The Lancet Public Health* 2020;**0**. doi:10.1016/S2468-2667(20)30112-2  
53  
54  
55  
56  
57  
58  
59  
60

1  
2  
3 78 United Nations. Goal 5: Achieve gender equality and empower all women and girls – COVID-19  
4 Response. 2020.<https://www.un.org/sustainabledevelopment/gender-equality/>  
5

6 79 Essen BS von, Kortsmid K, Warner L, *et al.* Preventing sexual transmission of Zika virus infection  
7 during pregnancy, Puerto Rico, USA, 2016. *Emerging Infectious Diseases* 2019;**25**:2115–9.  
8  
9  
10  
11  
12  
13  
14  
15  
16  
17  
18  
19  
20  
21  
22  
23  
24  
25  
26  
27  
28  
29  
30  
31  
32  
33  
34  
35  
36  
37  
38  
39  
40  
41  
42  
43  
44  
45  
46  
47  
48  
49  
50  
51  
52  
53  
54  
55  
56  
57  
58  
59  
60

For peer review only

1  
2  
3 **Figure Legends**  
4  
5  
6

7 Figure 1. Review flow chart  
8  
9

10 Figure 2. Summary of intervention effects by outcome type  
11  
12

13 Figure 3. Quality appraisal  
14  
15  
16  
17  
18  
19  
20  
21  
22  
23  
24  
25  
26  
27  
28  
29  
30  
31  
32  
33  
34  
35  
36  
37  
38  
39  
40  
41  
42  
43  
44  
45  
46  
47  
48  
49  
50  
51  
52  
53  
54  
55  
56  
57  
58  
59  
60

For peer review only

Tables

Table 1. Characteristics of Included Studies

| Study                | Country      | Type of PHE | Intervention Type                                      | Outcome                                                                                                                                                                                                                                                                                                             | Research Design       | Type of Evaluation              | Study Sample                                                                                           |
|----------------------|--------------|-------------|--------------------------------------------------------|---------------------------------------------------------------------------------------------------------------------------------------------------------------------------------------------------------------------------------------------------------------------------------------------------------------------|-----------------------|---------------------------------|--------------------------------------------------------------------------------------------------------|
| Azadi et al. 2017    | Ethiopia     | Drought     | Economic empowerment:<br>Food aid membership           | <b>Access to economic resources:</b><br>Food aid programme membership                                                                                                                                                                                                                                               | Cross-sectional study | Evaluation of programme uptake  | 479 households in villages (1 respondent per household)                                                |
| Badri et al. 2006    | Iran         | Earthquake  | Policy of involuntary planned resettlement             | <b>Access to economic resources:</b><br>Female general employment, female employment in governmental jobs, women's travel time to work                                                                                                                                                                              | Case-control study    | Evaluation of programme effects | 64 relocated communities, 129 host communities                                                         |
| Bandiera et al. 2019 | Sierra Leone | Ebola       | Economic empowerment and reproductive health education | <b>Equal opportunities:</b><br>School enrolment, income generation activities, literacy, numeracy, entrepreneurial confidence, financial literacy<br><b>Violence:</b><br>Unwanted sex<br><b>Reproductive health:</b><br>Time spent with men, condom use, frequency of unprotected sex, transactional sex, pregnancy | RCT                   | Evaluation of programme effects | Intervention: 150 villages/3592 girls 12-25 years, Control: 50 villages/1198 girls control 12-25 years |

|                              |                  |            |                                                           |                                                                                                                                                                          |                       |                                                            |                                                                                                           |
|------------------------------|------------------|------------|-----------------------------------------------------------|--------------------------------------------------------------------------------------------------------------------------------------------------------------------------|-----------------------|------------------------------------------------------------|-----------------------------------------------------------------------------------------------------------|
| Becker 2009                  | India            | Tsunami    | Psychosocial care                                         | Psychological distress                                                                                                                                                   | Case control study    | Evaluation of programme effects                            | Intervention: 100 female survivors of the 2004 tsunami, Control: 100 female survivors of the 2004 tsunami |
| Christian et al. 2018        | India            | Cyclone    | Economic empowerment:<br>Financial aid                    | <b>Equal opportunities:</b><br>Political knowledge, attendance of village meeting, voting in village council                                                             | Natural experiment    | Evaluation of programme effects                            | 2874 households                                                                                           |
| Dhital et al. 2019           | Nepal            | Earthquake | Community-based health promotion                          | <b>Reproductive health:</b><br>Maternal and child health knowledge, health care seeking (ANC visits + institutional delivery)                                            | Case-control study    | Evaluation of programme effects                            | 364 women of reproductive age at baseline, 377 women of reproductive age at endline                       |
| Doocy et al. 2005            | Ethiopia         | Drought    | Economic empowerment:<br>Microcredit                      | <b>Health equity between men and women:</b><br>Malnutrition and receipt of food aid                                                                                      | Cross-sectional study | Evaluation of programme effects                            | 164 established female microfinance clients 164, 99 new clients, 89 control women                         |
| Earle-Richardson et al. 2018 | Puerto Rico      | Zika       | Health education (focused on Zika prevention)             | <b>Reproductive health:</b><br>condom use, sexual abstinence<br><br>Receipt of program, vector control behaviour (e.g., repellent use, bednet use, wearing long sleeves) | Cross-sectional study | Evaluation of programme implementation and effects         | 1329 pregnant women                                                                                       |
| Essen et al. 2019            | Puerto Rico, USA | Zika       | Reproductive health training (focused on Zika prevention) | <b>Reproductive health:</b><br>Condom use                                                                                                                                | Cross-sectional study | Evaluation of programme effects                            | 2364 women with a recent live birth                                                                       |
| Giarratano et al. 2015       | USA              | Hurricane  | Reproductive Health Training                              | <b>Reproductive health:</b><br>Perceptions of prenatal care, prenatal health behaviors (e.g., drug                                                                       | Cross-sectional study | Evaluation of programme uptake, implementation and effects | 402 prenatal women (24-40 weeks) from prenatal clinics and classes (282                                   |



|                      |             |                                                            |                                   |                                                                                                                                      |                       |                                        |                                                                                    |
|----------------------|-------------|------------------------------------------------------------|-----------------------------------|--------------------------------------------------------------------------------------------------------------------------------------|-----------------------|----------------------------------------|------------------------------------------------------------------------------------|
|                      |             |                                                            |                                   | use, vitamin consumption), birth outcomes (e.g., low birthweight, preterm birth, anemia)                                             |                       | ürphraprocess/<br>programme effects    | experiencing only traditional PNC, while 120 received the additional intervention) |
| Lathrop et al. 2018* | Puerto Rico | Zika                                                       | Reproductive Health Training      | <b>Reproductive health:</b> Proportion of women receiving same-day contraceptive services, proportion of women selecting LARC method | Cross-Sectional Study | Evaluation of programme effect/process | 3294 women                                                                         |
| Lathrop et al. 2020* | Puerto Rico | Zika                                                       | Reproductive Health Training      | <b>Reproductive health:</b> LARC removal                                                                                             | Cohort study          | Evaluation of programme uptake         | 29,221 women who participated throughout the life of the program                   |
| Romero et al. 2015*  | Puerto Rico | Zika                                                       | Reproductive Health Training      | <b>Reproductive health:</b> Number of women receiving Zika prevention services, reach of awareness campaign                          | Cross-Sectional Study | Evaluation of programme uptake/process | Unclear                                                                            |
| Shahriar et al. 2019 | Bangladesh  | Flood, River bank erosion, cyclone (in the past 12 months) | Economic empowerment: Microcredit | <b>Domestic Violence</b>                                                                                                             | Case Control Study    | Evaluation of programme uptake         | 583 women between ages 18-45 who were first-time loan recipient                    |

\*Studies report on the same intervention

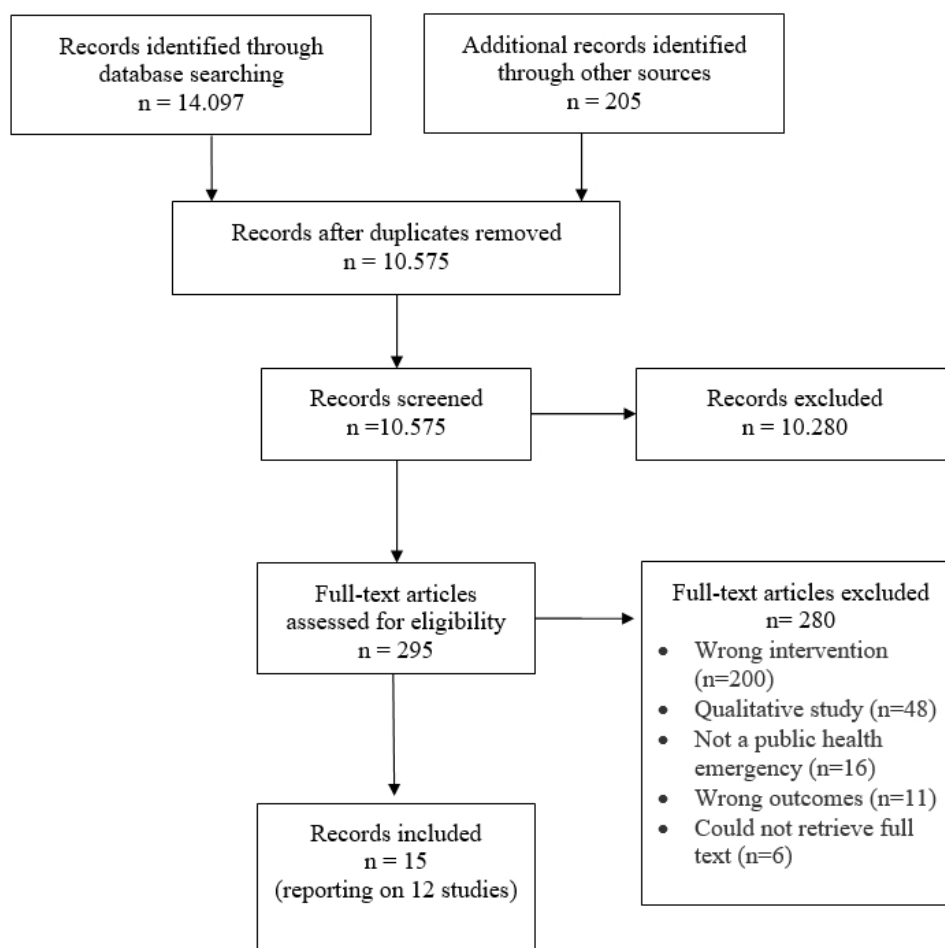

Figure 1. Review flow chart

| Intervention Type    | Study                                                      | SDG Outcomes Framework |                |                   |             |                     |                     |      |               |                    |               |
|----------------------|------------------------------------------------------------|------------------------|----------------|-------------------|-------------|---------------------|---------------------|------|---------------|--------------------|---------------|
|                      |                                                            | Violence (GBV)         | Discrimination | Harmful Practices | Unpaid work | Equal opportunities | Reproductive health | WASH | Access to ICT | Economic resources | Health equity |
| Economic Empowerment | Azadi et al. 2017                                          |                        |                |                   |             |                     |                     |      |               |                    |               |
|                      | Bandiera et al. 2019                                       | -                      |                |                   |             |                     |                     |      |               |                    |               |
|                      | Christian et al. 2018                                      |                        |                |                   |             | +                   | +                   |      |               |                    |               |
|                      | Doocy et al. 2005                                          |                        |                |                   |             | 0                   |                     |      |               |                    |               |
|                      | Shahriar et al. 2019                                       | U                      |                |                   |             |                     |                     |      |               |                    | +             |
| Health Promotion     | Dhital et al. 2019                                         |                        |                |                   |             |                     | +                   |      |               |                    |               |
|                      | Earle-Richardson et al. 2018                               |                        |                |                   |             |                     | I/O                 |      |               |                    | I/O           |
|                      | Essen et al. 2019                                          |                        |                |                   |             |                     | +                   |      |               |                    |               |
|                      | Giarratano et al. 2015                                     |                        |                |                   |             |                     | I/O                 |      |               |                    | U             |
|                      | Lathrop et al. 2020/18 & Romero et al. 2015<br>Becker 2009 |                        |                |                   |             |                     | U/I/+               |      |               |                    | +             |
| Resettlement         | Badri et al. 2006                                          |                        |                |                   |             |                     |                     |      |               | -                  |               |

Figure 2. Summary of intervention effects by outcome type



| Research Design                         | Study                                          | Sampling                                            | Measurement Procedures                                 | Statistical Analysis -Type                                              | Adjusted |
|-----------------------------------------|------------------------------------------------|-----------------------------------------------------|--------------------------------------------------------|-------------------------------------------------------------------------|----------|
| Experimental/quasi-experimental studies | Bandiera et al. 2019                           | Random sampling                                     | Susceptible to measurement error                       | ANCOVA                                                                  | yes      |
|                                         | Christian et al. 2018                          | Random sampling                                     | <i>Insufficient reporting</i>                          | Triple difference-in-difference                                         | yes      |
| Non-randomised controlled studies       | Badri et al. 2006                              | <i>Insufficient reporting</i>                       | <i>Insufficient reporting</i>                          | Frequency comparisons, point estimates only                             | no       |
|                                         | Becker 2009                                    | Convenience sampling                                | Good quality                                           | T-tests comparing pre- and post-test data                               | yes      |
|                                         | Dhital et al. 2019                             | Convenience sampling                                | Susceptible to measurement error                       | Chi-square tests & multivariate logistic regression                     | yes      |
|                                         | Shahriar et al. 2019                           | Random sampling                                     | Good quality                                           | Moderated mediation regression                                          | yes      |
| Cross-sectional                         | Azadi et al. 2017                              | <i>Insufficient reporting</i>                       | Good quality                                           | Frequency comparisons, point estimates only                             | no       |
|                                         | Doocy et al. 2005                              | <i>Insufficient reporting</i>                       | Good quality                                           | Multivariate logistic regression                                        | yes      |
|                                         | Earle-Richardson et al. 2018                   | Random sampling                                     | Susceptible to measurement error                       | Multivariate logistic regression                                        | yes      |
|                                         | Essen et al. 2019                              | Random sampling                                     | Susceptible to measurement error                       | ANOVA                                                                   | yes      |
|                                         | Giarratano et al. 2015                         | Convenience sampling                                | Good quality                                           | Chi-square tests & t-tests& multivariate linear and logistic regression | yes      |
|                                         | Lathrop et al. 2020, 2018 & Romero et al. 2015 | Clinics: Full sample / Survey: Convenience sampling | Medium quality (no validation/pre-testing of measures) | Frequency comparisons, point estimates only                             | no       |

Figure 3. Quality appraisal

## Appendix

Table A1. Search String (MEDLINE)

|                                                                 |                                                                                                                                                                                                                                                                                                                                                                                                                                                                                                                                                                                                                                                                                                                                                                                                                                                                                                                                                                                                                                                                                                                                                                                                                                                                                                                                                                                                                                                                                                            |
|-----------------------------------------------------------------|------------------------------------------------------------------------------------------------------------------------------------------------------------------------------------------------------------------------------------------------------------------------------------------------------------------------------------------------------------------------------------------------------------------------------------------------------------------------------------------------------------------------------------------------------------------------------------------------------------------------------------------------------------------------------------------------------------------------------------------------------------------------------------------------------------------------------------------------------------------------------------------------------------------------------------------------------------------------------------------------------------------------------------------------------------------------------------------------------------------------------------------------------------------------------------------------------------------------------------------------------------------------------------------------------------------------------------------------------------------------------------------------------------------------------------------------------------------------------------------------------------|
| <p>#1<br/>[public health emergencies and response measures]</p> | <p>pandemic* OR epidemic* OR (disease adj2 outbreak*) OR (disease adj2 transmission) OR (public health adj2 emergenc*) OR (public health adj2 disaster*) OR (humanitarian adj2 emergenc*) OR (humanitarian adj2 disaster*) OR (catastrophic event*) OR (humanitarian adj2 catastroph*) OR (public health adj2 catastroph*) OR (natural adj2 disaster*) OR (disaster adj2 victim*) OR (natural adj2 hazard) OR (natural adj2 catastroph*) OR tsunami* OR earthquake* OR flood* OR hurricane* OR cyclone* OR tornado* OR avalanche OR cyclone* OR typhoon* OR monsoon* OR landslide* OR volcanic eruption OR draught* OR famine* OR (crop failure) OR (crop shortfall*) OR (crop shortage*) OR infestation* OR (severe acute respiratory syndrome) OR SARS OR (swine flu) OR H1N1 OR polio OR ebola OR zika OR (Middle Eastern Respiratory Syndrome) OR MERS OR MERS-CoV OR coronavirus OR Corona OR COVID-19 OR SARS-CoV-2 OR 2019-nCoV OR Ebola OR ebolavirus OR EVD OR cholera OR chikungunya OR (Crimean-Congo haemorrhagic fever) OR influenza OR (Lassa fever) OR (Marburg virus disease) OR meningitis OR monkeypox OR (Nipah virus infection) OR (Nipah virus) OR plague OR (rift valley fever) OR (rift valley adj2 disease) OR tularemia OR (yellow fever) OR quarantine* OR (social isolation) OR (physical isolation) OR (social distanc*) OR (physical distanc*) OR (shelter in place) OR lockdown* OR shutdown*</p>                                                                            |
| <p>#2 [Outcomes]</p>                                            | <p>[Discrimination aspect]</p> <p>sexism OR ((women OR woman OR girl* OR female* OR gender OR transgender OR transwoman OR transwomen OR (trans?feminine) OR (trans?female*) OR sex*) adj6 (inequalit* OR equalit* OR inequit* OR equit* OR discriminat* OR bias OR (differential treatment) OR (preferential treatment) OR disadvantage OR prejudic*)) OR (gender adj4 (norm OR norms OR normative OR attitude* OR belief*))</p> <p>[Violence aspect]</p> <p>GBV OR VAW OR VAWG OR IPV OR ((women OR woman OR girl* OR female* OR gender OR transgender OR transwoman OR transwomen OR (trans?feminine) OR (trans?female*) OR wife OR wives OR husband* OR dating OR partner* OR relationship OR family OR married OR marriage OR domestic OR sex*) adj6 (violence OR violent OR abuse OR abusive OR victim* OR harass* OR assault* OR maltreat* OR aggress* OR batter* OR beat* OR hit* OR homicide* OR murder* OR injury OR injuries OR (coercive control) OR (controlling behaviour) OR (controlling behavior) OR rape OR traffick* OR exploit* OR safety OR danger OR fear)) OR (force* adj2 sex) OR (coerc* adj2 sex) OR (unwanted adj2 sex) OR rape OR raped OR rapes OR raping</p> <p>[Harmful practices aspect]</p> <p>(child bride) OR childbride OR (child marriage) OR (underage* marriage) OR (under age marriage) OR (forced marriage) OR (early marriage) OR (adolescent marriage) OR (female genital mutilation) OR (female genital cutting) OR FGM OR FGC</p> <p>[Unpaid Work aspect]</p> |

|                                                                                                                                                                                                                                                                                                                                                                                                                                                                                                                                                                                                                                                                                                                                                                                                                                                                                                                                                                                                                                                                                                                                                                                                                                                                                                                                                                                                                                                                                                                                                                                                                                                                                                                                                                                                                                                                                                                                                                                                                                                                                                                                                                                                                                                                                                                                                                                                                                                                                                                                                                                                                                                                                                                                                                                                                                                                                                                                                                                                    |
|----------------------------------------------------------------------------------------------------------------------------------------------------------------------------------------------------------------------------------------------------------------------------------------------------------------------------------------------------------------------------------------------------------------------------------------------------------------------------------------------------------------------------------------------------------------------------------------------------------------------------------------------------------------------------------------------------------------------------------------------------------------------------------------------------------------------------------------------------------------------------------------------------------------------------------------------------------------------------------------------------------------------------------------------------------------------------------------------------------------------------------------------------------------------------------------------------------------------------------------------------------------------------------------------------------------------------------------------------------------------------------------------------------------------------------------------------------------------------------------------------------------------------------------------------------------------------------------------------------------------------------------------------------------------------------------------------------------------------------------------------------------------------------------------------------------------------------------------------------------------------------------------------------------------------------------------------------------------------------------------------------------------------------------------------------------------------------------------------------------------------------------------------------------------------------------------------------------------------------------------------------------------------------------------------------------------------------------------------------------------------------------------------------------------------------------------------------------------------------------------------------------------------------------------------------------------------------------------------------------------------------------------------------------------------------------------------------------------------------------------------------------------------------------------------------------------------------------------------------------------------------------------------------------------------------------------------------------------------------------------------|
| <p>(care burden) OR (child care) OR childcare OR (unpaid work) OR (time allocation) OR (house work) OR housework OR (domestic work) OR (domestic chore*) OR homemaker*</p> <p>[Equal opportunities aspect] (women OR woman OR girl* OR female* OR gender OR transgender OR transwoman OR transwomen OR (trans?feminine) OR (trans?female*)) adj6 [(empower* OR agency OR emancipat* OR vote OR voting OR (social capital) OR school* OR education* OR grade retention OR cognitive development OR literacy OR numeracy) OR ((political OR society OR societal OR community OR communities OR equal* OR equit* OR household OR organization* OR business*) adj3 (participation OR (decision making) OR (decision-making) OR represent* OR leader* OR influence OR opportunit* OR manage*))]</p> <p>[Economic participation aspect]</p> <p>((women OR woman OR girl* OR female* OR gender OR transgender OR transwoman OR transwomen OR (trans?feminine) OR (trans?female*)) adj4 ((labo?r market) OR employ* OR unemploy* OR (work) OR (job) OR (labo?r protection) OR (labo?r supply) OR income* OR earning* OR wage* OR salary OR salarie* OR asset* OR expenditure* OR consumption OR saving* OR credit OR (financial inclusion) OR (account holder) OR (account ownership) OR entrepreneurship)) OR (wage gap) OR (salary gap) OR (pay gap)</p> <p>[ICT aspect]</p> <p>(women OR woman OR girl* OR female* OR gender OR transgender OR transwoman OR transwomen OR (trans?feminine) OR (trans?female*)) adj6 ((information AND communication) OR (information technology) OR (communication technology) OR (IT skills) OR (Internet access) OR ICT OR (SIM card) OR (mobile phone) OR (cell* phone) OR (phone subscription) OR (phone network) OR radio OR television OR telephone OR (local area network) OR LAN OR extranet OR (World Wide Web) OR (mobile money) OR (mobile banking) OR computing OR e-commerce OR (enabling technology) OR technolog*)</p> <p>[WASH aspect]</p> <p>((women OR woman OR girl* OR female* OR gender OR transgender OR transwoman OR transwomen OR (trans?feminine) OR (trans?female*)) adj4 (hygien* OR WASH OR water OR sanitation OR toilet OR soap OR latrine OR handwashing OR hand-washing)) OR (menstrual hygiene) OR (menstrual health) OR (period poverty) OR (menstrual adj2 management) OR (menstrual practice*) OR (menstrual experience) OR (menstruation experience)</p> <p>[Sexual and reproductive health aspect]</p> <p>[((maternal mortality) OR (perinatal mortality) OR (maternal death) OR (maternal morbidity) OR (perinatal morbidity) OR (obstetric care) OR (antenatal care) OR (perinatal care) OR (sexually transmitted infection) OR STI OR (reproductive tract infection) OR RTI OR (reproductive rights) OR contraception OR contraceptive OR condom* OR (family planning) OR (unintended pregnanc*) OR (unwanted pregnanc*) OR (teenage pregnanc*) OR abortion OR (menstrual regulation) OR (sexual and reproductive health</p> |
|----------------------------------------------------------------------------------------------------------------------------------------------------------------------------------------------------------------------------------------------------------------------------------------------------------------------------------------------------------------------------------------------------------------------------------------------------------------------------------------------------------------------------------------------------------------------------------------------------------------------------------------------------------------------------------------------------------------------------------------------------------------------------------------------------------------------------------------------------------------------------------------------------------------------------------------------------------------------------------------------------------------------------------------------------------------------------------------------------------------------------------------------------------------------------------------------------------------------------------------------------------------------------------------------------------------------------------------------------------------------------------------------------------------------------------------------------------------------------------------------------------------------------------------------------------------------------------------------------------------------------------------------------------------------------------------------------------------------------------------------------------------------------------------------------------------------------------------------------------------------------------------------------------------------------------------------------------------------------------------------------------------------------------------------------------------------------------------------------------------------------------------------------------------------------------------------------------------------------------------------------------------------------------------------------------------------------------------------------------------------------------------------------------------------------------------------------------------------------------------------------------------------------------------------------------------------------------------------------------------------------------------------------------------------------------------------------------------------------------------------------------------------------------------------------------------------------------------------------------------------------------------------------------------------------------------------------------------------------------------------------|

|                               |                                                                                                                                                                                                                                                                                                                                                                                                                                                                                                                                        |
|-------------------------------|----------------------------------------------------------------------------------------------------------------------------------------------------------------------------------------------------------------------------------------------------------------------------------------------------------------------------------------------------------------------------------------------------------------------------------------------------------------------------------------------------------------------------------------|
|                               | OR SRH OR SRHR) OR ((sex* OR fertility OR contracept* OR reproducti* OR (family planning)) AND ((decision-making) OR (decision making) OR choice OR (informed-choice) OR (cohers*) OR (self efficacy) OR (self-efficacy) OR power)) OR ((sexu* OR reproducti*) AND (knowledge OR education)) OR ((birth OR delivery) AND ((skilled attend*) OR (skilled worker) OR (health personal) OR (health professional) OR (health care) OR (facility) OR (community health work*) OR CHW OR (skilled care) OR institutional)] NOT (HIV OR AIDS) |
| #3<br>[Women]                 | women OR woman OR girl* OR female* OR gender OR transgender OR transwoman OR transwomen OR (trans?feminine) OR (trans?female*) OR wife OR wives OR (sex disaggregated) OR (sex differences) OR maternal OR antenatal OR perinatal OR prenatal OR housewife OR housewives                                                                                                                                                                                                                                                               |
| #4<br>[Interventions]         | intervention* OR intervene OR policy OR policies OR response OR responses OR prevention* OR preventive OR strategy OR strategies OR program* OR service* OR evaluate OR evaluation* OR trial OR trials OR RCT OR impact OR kit OR toolkit OR effectiveness OR efficacy                                                                                                                                                                                                                                                                 |
| #1 AND #2<br>AND #3 AND<br>#4 |                                                                                                                                                                                                                                                                                                                                                                                                                                                                                                                                        |

# BMJ Open

## Response Strategies for Promoting Gender Equality in Public Health Emergencies: A Rapid Scoping Review

|                                 |                                                                                                                                                                                                                                                                                                                                                                                                                                                                                                                                                                                                                                        |
|---------------------------------|----------------------------------------------------------------------------------------------------------------------------------------------------------------------------------------------------------------------------------------------------------------------------------------------------------------------------------------------------------------------------------------------------------------------------------------------------------------------------------------------------------------------------------------------------------------------------------------------------------------------------------------|
| Journal:                        | <i>BMJ Open</i>                                                                                                                                                                                                                                                                                                                                                                                                                                                                                                                                                                                                                        |
| Manuscript ID                   | bmjopen-2020-048292.R1                                                                                                                                                                                                                                                                                                                                                                                                                                                                                                                                                                                                                 |
| Article Type:                   | Original research                                                                                                                                                                                                                                                                                                                                                                                                                                                                                                                                                                                                                      |
| Date Submitted by the Author:   | 28-Jun-2021                                                                                                                                                                                                                                                                                                                                                                                                                                                                                                                                                                                                                            |
| Complete List of Authors:       | Steinert, Janina; Technical University of Munich, TUM School of Governance; University of Oxford, Department of Social Policy and Intervention<br>Alacevich, Caterina; University of Oxford, Nuffield Department of Primary Care Health Sciences<br>Steele, Bridget; University of Oxford, Department of Social Policy and Intervention<br>Hennegan, Julie; University of Melbourne, Melbourne School of Population and Global Health; Burnet Institute, Maternal, Child and Adolescent Health Program<br>Yakubovich, Alexa; University of Toronto, MAP Centre for Urban Health Solutions, St Michael's Hospital, Unity Health Toronto |
| <b>Primary Subject Heading</b>: | Public health                                                                                                                                                                                                                                                                                                                                                                                                                                                                                                                                                                                                                          |
| Secondary Subject Heading:      | Evidence based practice, Health policy, Infectious diseases, Sexual health                                                                                                                                                                                                                                                                                                                                                                                                                                                                                                                                                             |
| Keywords:                       | COVID-19, Public health < INFECTIOUS DISEASES, HEALTH ECONOMICS, Health policy < HEALTH SERVICES ADMINISTRATION & MANAGEMENT                                                                                                                                                                                                                                                                                                                                                                                                                                                                                                           |
|                                 |                                                                                                                                                                                                                                                                                                                                                                                                                                                                                                                                                                                                                                        |

SCHOLARONE™  
Manuscripts





I, the Submitting Author has the right to grant and does grant on behalf of all authors of the Work (as defined in the below author licence), an exclusive licence and/or a non-exclusive licence for contributions from authors who are: i) UK Crown employees; ii) where BMJ has agreed a CC-BY licence shall apply, and/or iii) in accordance with the terms applicable for US Federal Government officers or employees acting as part of their official duties; on a worldwide, perpetual, irrevocable, royalty-free basis to BMJ Publishing Group Ltd ("BMJ") its licensees and where the relevant Journal is co-owned by BMJ to the co-owners of the Journal, to publish the Work in this journal and any other BMJ products and to exploit all rights, as set out in our [licence](#).

The Submitting Author accepts and understands that any supply made under these terms is made by BMJ to the Submitting Author unless you are acting as an employee on behalf of your employer or a postgraduate student of an affiliated institution which is paying any applicable article publishing charge ("APC") for Open Access articles. Where the Submitting Author wishes to make the Work available on an Open Access basis (and intends to pay the relevant APC), the terms of reuse of such Open Access shall be governed by a Creative Commons licence – details of these licences and which [Creative Commons](#) licence will apply to this Work are set out in our licence referred to above.

Other than as permitted in any relevant BMJ Author's Self Archiving Policies, I confirm this Work has not been accepted for publication elsewhere, is not being considered for publication elsewhere and does not duplicate material already published. I confirm all authors consent to publication of this Work and authorise the granting of this licence.

## Response Strategies for Promoting Gender Equality in Public Health Emergencies:

### A Rapid Scoping Review

**Janina Isabel Steinert\***, Technical University of Munich (Germany) & Department of Social Policy and Intervention, University of Oxford (UK);

**Caterina Alacevich**, Nuffield Department of Primary Care Health Sciences, CHSEO, University of Oxford (UK);

**Bridget Steele**, Department of Social Policy and Intervention, University of Oxford (UK);

**Julie Hennegan**, Maternal, Child and Adolescent Health Program, Burnet Institute, Melbourne, VIC (Australia) & Melbourne School of Population and Global Health, University of Melbourne, VIC (Australia);

**Alexa R. Yakubovich**, MAP Centre for Urban Health Solutions, St Michael's Hospital, Unity Health Toronto & University of Toronto (Canada)

*\*Corresponding author*  
*Richard-Wagner Str. 1*  
*80333 München, Germany*  
[Janina.steinert@tum.de](mailto:Janina.steinert@tum.de)

## Abstract

**Objectives:** The COVID-19 pandemic threatens to widen existing gender inequities worldwide. A growing body of literature assesses the harmful consequences of public health emergencies (PHEs) for women and girls; however, evidence of what works to alleviate such impacts is limited. To inform viable mitigation strategies, we reviewed the evidence on gender-based interventions implemented in PHEs, including disease outbreaks and natural disasters.

**Methods:** We conducted a rapid scoping review to identify eligible studies by systematically searching the databases MEDLINE, Global Health, and Web of Science with the latest search update on 28 May 2021. We used the Sustainable Development Goals (SDGs) as a guiding framework to identify eligible outcomes of gender (in)equality.

**Results:** Out of 13,920 records, 16 studies met our eligibility criteria. These included experimental (3), cohort (2), case-control (3), and cross-sectional (9) studies conducted in the context of natural disasters (earthquakes, droughts, storms) or epidemics (Zika, Ebola, COVID-19). Six studies were implemented in Asia, seven in North/Central America, and three in Africa. Interventions included economic empowerment programmes (5), health promotion, largely focused on reproductive health (10), and a post-earthquake resettlement programme (1). Included studies assessed gender-based outcomes in the domains of sexual and reproductive health, equal opportunities, access to economic resources, violence, and health. There was a dearth of evidence for other outcome domains relevant to gender equity such as harmful practices, sanitation and hygiene practices, workplace discrimination, and unpaid work. Economic empowerment interventions showed promise in promoting women's and girls' economic and educational opportunities as well as their sexual and reproductive health during public health emergencies. However, some programme beneficiaries may be at risk of experiencing unintended harms such as an increase in domestic violence. Focused reproductive health promotion may also be an effective strategy for supporting women's sexual and reproductive health, although additional experimental evidence is needed.

**Conclusions:** This study identified critical evidence gaps to guide future research on approaches to alleviating gender inequities during PHEs. We further highlight that interventions to promote gender equity in PHEs should take into account possible harmful side effects such as increased gender-based violence.

**Review Registration:** DOI 10.17605/OSF.IO/8HKFD.

## Strengths and limitations of this study

- This is the first review to assess interventions and programs to prevent or mitigate the impact of public health emergencies on gender inequality worldwide
- This rapid scoping review points to important evidence gaps with regards to several SDG indicators of gender inequality (e.g., harmful practices, sanitation and hygiene, workplace discrimination, and unpaid work)
- We only considered published studies and are thus unable to present insights that may emerge from reviewing grey literature
- Our search was limited to research published in English and findings published in other languages were therefore not synthesised
- While we present evidence on the uptake of, impact of, and engagement with interventions, we cannot draw conclusions on why and how a programme may work or not

### 1. Introduction

The COVID-19 pandemic has resulted in several million deaths worldwide and has caused devastating socioeconomic disruptions.[1] Emerging evidence shows that women and girls are likely to bear the brunt of the socioeconomic impacts of the pandemic, and that COVID-19 has the potential to exacerbate existing gender inequalities.[2–4] In light of this concern, this rapid scoping review aimed to identify interventions and policy strategies that can advance gender-equitable outcomes in the context of public health emergencies (PHEs). Given that the COVID-19 pandemic is currently ongoing, we adopted a broad perspective by drawing on scientific evidence from previous PHEs, including disease outbreaks, epidemics, pandemics, and natural disasters, along with evidence generated in response to the pandemic to date (28 May 2021).[5]

The UN Sustainable Development Goal 5 (SDG5) aims to “Achieve gender equality and empower all women and girls”. SDG5 defines gender (in)equality according to different domains, including violence against women, access to sexual and reproductive health, access to water, sanitation, and hygiene, educational and economic opportunities, exposure to harmful practices, as well as care and domestic work. A growing body of literature demonstrates the links between PHEs and gender

1  
2  
3 inequities across these domains. First, existing studies point to a rise in violence against women  
4 and girls during PHEs.[3, 6–8] Empirical research has documented a higher prevalence of physical  
5 and sexual violence against women during the Ebola crisis in Sierra Leone, Liberia, and the  
6  
7  
8  
9  
10  
11  
12  
13  
14  
15  
16  
17  
18  
19  
20  
21  
22  
23  
24  
25  
26  
27  
28  
29  
30  
31  
32  
33  
34  
35  
36  
37  
38  
39  
40  
41  
42  
43  
44  
45  
46  
47  
48  
49  
50  
51  
52  
53  
54  
55  
56  
57  
58  
59  
60

inequities across these domains. First, existing studies point to a rise in violence against women and girls during PHEs.[3, 6–8] Empirical research has documented a higher prevalence of physical and sexual violence against women during the Ebola crisis in Sierra Leone, Liberia, and the Gambia.[9–12] Recent studies suggest that women and children were exposed to an increased risk of family violence during the COVID-19 lockdown.[13–17] Plausible mechanisms include increased environmental and interpersonal stressors (e.g., greater economic instability), the need to shelter in place with abusive partners or family members, and barriers in accessing services or social support.[18,19]

Evidence from past PHEs has also highlighted detrimental impacts on women's sexual and reproductive health, largely as a result of the diversion of scarce healthcare resources and personnel to the immediate emergency response.[20–22] These include excess rates of miscarriages during the 1918 influenza,[23] higher odds of pregnancy-related mortality during the SARS and MERS epidemics[24], and excess maternal, neonatal, and stillbirth deaths due to major cuts in antenatal care coverage.[21] The COVID-19 pandemic has caused major disruptions in the supply chains for modern contraceptives in some low-income countries,[25] which may elevate the risk of teenage pregnancies. Relatedly, during the Ebola crisis in West Africa, the rate of teenage pregnancies increased by 65-75%.[26]

Further, PHEs can disrupt water, sanitation and hygiene (WASH) services including the failure of maintenance or supply systems,[27] and restrict access and availability of hygiene products such as soap and menstrual materials. Inadequate access to private, safe, and clean WASH facilities can expose women to physical discomfort, shame and stigmatisation while menstruating,[28] and constrain disease prevention efforts altogether.[29] A lack of basic services can also mean that women have to travel long distances to fetch water, which increases women's unpaid workload while reducing the time spent on education or income generation.[30]

1  
2  
3 Particularly in low-resource settings, PHEs can thwart girls' educational opportunities and make  
4 them more vulnerable to harmful practices such as child marriage. In Sierra Leone, for instance,  
5 the school enrolment rate of girls dropped by 16 percentage points post-Ebola.[31] School closures  
6 that were implemented to contain the spread of the coronavirus have affected more than 800 million  
7 girls to date.[32] There has been growing concern that this policy may ultimately widen gender  
8 gaps in education due to a higher load of household chores and caregiving work being assigned to  
9 girls, preventing them from studying.[32] In addition, as PHEs can put enormous economic strains  
10 on low-income households, marrying off a daughter to receive a brideprice can become a survival  
11 strategy for some families. For instance, Corno and colleagues (2020) found that in Sub-Saharan  
12 Africa, girls aged 12-17 years had a significantly higher likelihood of getting married if their  
13 household was affected by a drought.[33]

14  
15 In addition, in high- and low-income countries alike, women may face an increased informal care  
16 burden in the context of PHEs, either to look after family members who need daily assistance or  
17 who have fallen sick,[34] or to look after their children,[35] as was the case during the COVID-19  
18 lockdowns.[4] Increased care responsibility can thwart women's employment opportunities and  
19 amplify pre-existing biases in couples' division of paid and unpaid work.[36] For instance, Sevilla  
20 and Smith (2020) found that during the first COVID-19 infection wave in the UK mothers were  
21 taking a substantially larger share of the additional childcare hours per week compared to  
22 fathers.[37] In addition, International Labour Organization (2020) estimates suggest that during the  
23 first months of the COVID-19 pandemic, informal workers across the world were facing an average  
24 60% cut in their incomes.[38] Given that the informal sector employs disproportionately more  
25 women than men,[39] women have been particularly vulnerable to loss of livelihoods.[30]

26  
27  
28  
29  
30  
31  
32  
33  
34  
35  
36  
37  
38  
39  
40  
41  
42  
43  
44  
45  
46  
47  
48  
49  
50  
51  
52  
53  
54  
55  
56  
57  
58  
59  
60  
61  
62  
63  
64  
65  
66  
67  
68  
69  
70  
71  
72  
73  
74  
75  
76  
77  
78  
79  
80  
81  
82  
83  
84  
85  
86  
87  
88  
89  
90  
91  
92  
93  
94  
95  
96  
97  
98  
99  
100  
101  
102  
103  
104  
105  
106  
107  
108  
109  
110  
111  
112  
113  
114  
115  
116  
117  
118  
119  
120  
121  
122  
123  
124  
125  
126  
127  
128  
129  
130  
131  
132  
133  
134  
135  
136  
137  
138  
139  
140  
141  
142  
143  
144  
145  
146  
147  
148  
149  
150  
151  
152  
153  
154  
155  
156  
157  
158  
159  
160  
161  
162  
163  
164  
165  
166  
167  
168  
169  
170  
171  
172  
173  
174  
175  
176  
177  
178  
179  
180  
181  
182  
183  
184  
185  
186  
187  
188  
189  
190  
191  
192  
193  
194  
195  
196  
197  
198  
199  
200  
201  
202  
203  
204  
205  
206  
207  
208  
209  
210  
211  
212  
213  
214  
215  
216  
217  
218  
219  
220  
221  
222  
223  
224  
225  
226  
227  
228  
229  
230  
231  
232  
233  
234  
235  
236  
237  
238  
239  
240  
241  
242  
243  
244  
245  
246  
247  
248  
249  
250  
251  
252  
253  
254  
255  
256  
257  
258  
259  
260  
261  
262  
263  
264  
265  
266  
267  
268  
269  
270  
271  
272  
273  
274  
275  
276  
277  
278  
279  
280  
281  
282  
283  
284  
285  
286  
287  
288  
289  
290  
291  
292  
293  
294  
295  
296  
297  
298  
299  
300  
301  
302  
303  
304  
305  
306  
307  
308  
309  
310  
311  
312  
313  
314  
315  
316  
317  
318  
319  
320  
321  
322  
323  
324  
325  
326  
327  
328  
329  
330  
331  
332  
333  
334  
335  
336  
337  
338  
339  
340  
341  
342  
343  
344  
345  
346  
347  
348  
349  
350  
351  
352  
353  
354  
355  
356  
357  
358  
359  
360  
361  
362  
363  
364  
365  
366  
367  
368  
369  
370  
371  
372  
373  
374  
375  
376  
377  
378  
379  
380  
381  
382  
383  
384  
385  
386  
387  
388  
389  
390  
391  
392  
393  
394  
395  
396  
397  
398  
399  
400  
401  
402  
403  
404  
405  
406  
407  
408  
409  
410  
411  
412  
413  
414  
415  
416  
417  
418  
419  
420  
421  
422  
423  
424  
425  
426  
427  
428  
429  
430  
431  
432  
433  
434  
435  
436  
437  
438  
439  
440  
441  
442  
443  
444  
445  
446  
447  
448  
449  
450  
451  
452  
453  
454  
455  
456  
457  
458  
459  
460  
461  
462  
463  
464  
465  
466  
467  
468  
469  
470  
471  
472  
473  
474  
475  
476  
477  
478  
479  
480  
481  
482  
483  
484  
485  
486  
487  
488  
489  
490  
491  
492  
493  
494  
495  
496  
497  
498  
499  
500  
501  
502  
503  
504  
505  
506  
507  
508  
509  
510  
511  
512  
513  
514  
515  
516  
517  
518  
519  
520  
521  
522  
523  
524  
525  
526  
527  
528  
529  
530  
531  
532  
533  
534  
535  
536  
537  
538  
539  
540  
541  
542  
543  
544  
545  
546  
547  
548  
549  
550  
551  
552  
553  
554  
555  
556  
557  
558  
559  
560  
561  
562  
563  
564  
565  
566  
567  
568  
569  
570  
571  
572  
573  
574  
575  
576  
577  
578  
579  
580  
581  
582  
583  
584  
585  
586  
587  
588  
589  
590  
591  
592  
593  
594  
595  
596  
597  
598  
599  
600  
601  
602  
603  
604  
605  
606  
607  
608  
609  
610  
611  
612  
613  
614  
615  
616  
617  
618  
619  
620  
621  
622  
623  
624  
625  
626  
627  
628  
629  
630  
631  
632  
633  
634  
635  
636  
637  
638  
639  
640  
641  
642  
643  
644  
645  
646  
647  
648  
649  
650  
651  
652  
653  
654  
655  
656  
657  
658  
659  
660  
661  
662  
663  
664  
665  
666  
667  
668  
669  
670  
671  
672  
673  
674  
675  
676  
677  
678  
679  
680  
681  
682  
683  
684  
685  
686  
687  
688  
689  
690  
691  
692  
693  
694  
695  
696  
697  
698  
699  
700  
701  
702  
703  
704  
705  
706  
707  
708  
709  
710  
711  
712  
713  
714  
715  
716  
717  
718  
719  
720  
721  
722  
723  
724  
725  
726  
727  
728  
729  
730  
731  
732  
733  
734  
735  
736  
737  
738  
739  
740  
741  
742  
743  
744  
745  
746  
747  
748  
749  
750  
751  
752  
753  
754  
755  
756  
757  
758  
759  
760  
761  
762  
763  
764  
765  
766  
767  
768  
769  
770  
771  
772  
773  
774  
775  
776  
777  
778  
779  
780  
781  
782  
783  
784  
785  
786  
787  
788  
789  
790  
791  
792  
793  
794  
795  
796  
797  
798  
799  
800  
801  
802  
803  
804  
805  
806  
807  
808  
809  
810  
811  
812  
813  
814  
815  
816  
817  
818  
819  
820  
821  
822  
823  
824  
825  
826  
827  
828  
829  
830  
831  
832  
833  
834  
835  
836  
837  
838  
839  
840  
841  
842  
843  
844  
845  
846  
847  
848  
849  
850  
851  
852  
853  
854  
855  
856  
857  
858  
859  
860  
861  
862  
863  
864  
865  
866  
867  
868  
869  
870  
871  
872  
873  
874  
875  
876  
877  
878  
879  
880  
881  
882  
883  
884  
885  
886  
887  
888  
889  
890  
891  
892  
893  
894  
895  
896  
897  
898  
899  
900  
901  
902  
903  
904  
905  
906  
907  
908  
909  
910  
911  
912  
913  
914  
915  
916  
917  
918  
919  
920  
921  
922  
923  
924  
925  
926  
927  
928  
929  
930  
931  
932  
933  
934  
935  
936  
937  
938  
939  
940  
941  
942  
943  
944  
945  
946  
947  
948  
949  
950  
951  
952  
953  
954  
955  
956  
957  
958  
959  
960  
961  
962  
963  
964  
965  
966  
967  
968  
969  
970  
971  
972  
973  
974  
975  
976  
977  
978  
979  
980  
981  
982  
983  
984  
985  
986  
987  
988  
989  
990  
991  
992  
993  
994  
995  
996  
997  
998  
999  
1000

Lastly, the COVID-19 pandemic may disproportionately affect women's health risks. Although epidemiological evidence suggests that the COVID-19 infection and death rates are higher among

1  
2  
3 men (Williamson et al., 2020), women make up 70% of the global frontline health workforce and  
4  
5 may thus face a higher risk of contracting the virus.[40–43]  
6  
7

8  
9 In light of this evidence, it is clear that PHEs - including the ongoing COVID-19 pandemic - are  
10  
11 not gender-neutral.[44] Applying a gender lens to interventions and policies implemented in the  
12  
13 context of PHEs is therefore crucial. Despite the expansive literature on the detrimental effects of  
14  
15 PHEs on women and girls, systematic evidence regarding which interventions can mitigate these  
16  
17 impacts to date is scarce. To inform viable response strategies, we conducted a rapid scoping review  
18  
19 of the existing evidence on the relationship between interventions implemented in past PHEs and  
20  
21 gender equality goals. To our knowledge, this is the first comprehensive synthesis of the literature  
22  
23 on the uptake, mechanisms, and effects of PHE response programmes across the domains of gender  
24  
25 equality.  
26  
27  
28  
29  
30  
31

## 32 **2. Methods**

33  
34  
35 A review protocol specifying the search strategy and eligibility criteria was published via the Open  
36  
37 Science Foundation on 24 April 2020 (DOI 10.17605/OSF.IO/8HKFD). Our search and synthesis  
38  
39 strategies were based on rapid review guidelines.[45]  
40  
41  
42  
43  
44

### 45 **2.1 Search strategy**

46  
47 We searched for published studies describing interventions and policies implemented in the context  
48  
49 of PHEs that aimed to reduce gender inequality. We selected major health and social sciences  
50  
51 databases to reflect the cross-disciplinary nature of the topic. We searched MEDLINE, Global  
52  
53 Health, and Web of Science between 28 April and 7 May 2020 and updated the search on 28 May  
54  
55 2021. Search terms were in English and categorised according to the concepts of (i) PHEs (covering  
56  
57 search terms for pandemics, epidemics, and natural disaster), (ii) outcomes related to gender  
58  
59 (in)equality (covering search terms for the following SDG aspects: women's and girls'  
60

1  
2  
3 discrimination, violence, harmful practices, unpaid work, equal opportunities, economic  
4 participation, water, sanitation and hygiene, and sexual and reproductive health) , and (iii)  
5 interventions (see Appendix 1 for our search strategy). We hand-searched references of identified  
6 literature reviews for additional eligible studies.  
7  
8  
9  
10  
11  
12  
13

## 14 **2.2 Inclusion criteria**

15  
16 Studies were eligible if they reported on a gender-based intervention, policy, or response strategy  
17 that was implemented in the context of a PHE. We defined PHEs as situations in which an imminent  
18 threat of harm to public health necessitates immediate and non-routine action, including disease  
19 outbreaks, epidemics, pandemics (e.g., SARS, Zika, Ebola, etc.) or natural disasters (e.g.,  
20 earthquakes, tsunamis, flooding, etc.).[5,46,47] We excluded the HIV/AIDS pandemic, endemic  
21 diseases (e.g., malaria) rather than rapid and acute emergencies, and human-made rather than  
22 exogeneous events (e.g., the opioid crisis, humanitarian conflicts, terrorism), as we understood  
23 these to involve different mechanisms of impact and because we hypothesised that response  
24 strategies would need to be different. We also excluded vaccination and immunisation programmes  
25 as these interventions cannot be adequately transferred to the context of other PHEs. Lastly, we  
26 excluded programmes that were existing prior to pandemics and then continuously delivered  
27 throughout.  
28  
29  
30  
31  
32  
33  
34  
35  
36  
37  
38  
39  
40  
41  
42  
43  
44

45 Our inclusion criteria required that studies reported on either gendered predictors of uptake of and  
46 engagement with (e.g., use of and participation in) an active intervention or assessed associations  
47 between the intervention and outcomes related to gender (in)equality. To define these outcomes,  
48 we drew on the targets of the SDGs, specifically SDG5 on gender equality and other gender-  
49 relevant SDG targets (SDG3: Health, SDG4: Education, SDG6: Water, Sanitation and Hygiene)  
50 (see Box 1 for our outcomes framework).  
51  
52  
53  
54  
55  
56  
57  
58  
59  
60



This rapid scoping review excluded qualitative studies but did not apply any other restrictions with regards to the research design, considering that it might be unethical or unfeasible to conduct a randomised controlled trial during a PHE. No restrictions were made in terms of geographic setting of the intervention, participants' age, or publication date.

- Discrimination of women and girls (e.g., legal frameworks to promote non-discrimination, enacted/perceived gender attitudes/norms) (*SDG 5.1*)
- Violence against women and girls (e.g., psychological, physical, sexual violence by an intimate partner or other person) (*SDG 5.2*)
- Harmful practices (e.g., forced marriage, child marriage) (*SDG 5.3*)
- Recognition of unpaid domestic work and shared responsibility of domestic burdens (*SDG 5.4*)
- Equal opportunities in political, economic, and public life (e.g. girls' school enrolment rates, share of women in political/economic leadership roles) (*SDG 5.5, SDG 4.5*)
- Women's and girls' sexual and reproductive health (e.g., incidence of teenage pregnancies, use of modern contraceptives) (*SDG 5.6, SDG 3.7*)
- Maternal health (*SDG 3.1*)
- Equal rights to economic resources (e.g., proportion of women in formal employment, access to financial services) (*SDG 5.a*)
- Women's and girls' access to information and communication technologies (*SDG 5.b*)
- Access to water, sanitation, and hygiene (WASH) for women and girls' specific health needs (e.g., women's access to menstrual health and hygiene resources, etc.) (*SDG 6.2*)

Box 1. Gender Equality Outcome Framework (Authors' elaboration)

### 2.3 Study screening and data extraction

After removing duplicates, we screened titles and abstracts. We first independently piloted our screening criteria on 200 records. Once we established 100% consistency in our decisions, we divided the remaining records among all authors. We followed a similar process for full-text screening: we independently piloted 10% of all potentially eligible studies to establish consistency, then we divided screening among four authors. We extracted data from included studies using a piloted Excel form, including (i) type and country of PHE, (ii) description of the intervention, (iii) target population and sample size, (iv) research design, and (v) gender-related outcomes.

## 2.4 Data synthesis

We graphically synthesised data by categorising studies according to intervention type and mapped these against our gender inequality outcomes framework. We synthesised these data across three aspects of interventions drawing on the Medical Research Council (MRC) framework for evaluating complex interventions: (i) uptake and reach of the intervention, (ii) implementation process of the intervention (e.g., participant engagement and attendance), and (iii) intervention effects.[48] We classified intervention results as *positive* (+) if estimates suggested that the intervention presented a positive association with gender equity outcomes, *negative* (-) if estimates suggested that the intervention presented a negative association, and *neutral* (0) if estimates were not conclusive (i.e., a mix of positive, negative, or null results). We made these determinations based on the direction and size of the point estimate and variability of the interval estimate, wherever available, as opposed to relying solely on statistical significance, in line with current best practice.[49,50] We critically appraised the quality of included studies according to the suitability of the research design for the research question, the representativeness of the sample, the quality of the measurement procedures, and the transparency and rigour of the applied statistical analyses.

## 2.5 Patient and public involvement

Patients (or in this case: emergency-affected populations) were not involved at the design or analysis stage of this study because we exclusively relied on secondary data from previously published articles. However, we intend to present results to relevant populations to involve them in the interpretation and dissemination of our research finding as well as involve them in designing questions to ask in future studies.

### 3. Results

#### 3.1 Included Studies

The database search returned 13,920 unique articles after deduplication (see Figure 1). We excluded 13,546 studies after screening titles and abstracts. After screening 374 full texts, we excluded 353 because they reported on ineligible interventions (61%), were qualitative (22%), were not implemented in the context of a PHE (7%), did not include gender-related outcomes (7%), could not be retrieved in full text (2%), or were currently ongoing (1%). Twenty papers met the inclusion criteria, of which four reported on the same intervention, thus resulting in sixteen stand-alone studies.

*[please insert Figure 1 about here]*

#### 3.2 Characteristics of included studies

##### 3.2.1 Geographic setting and PHE

Table 1 and Figure 2 present an overview of the 16 included studies. Included studies were published between 2005 and 2021. The majority of interventions were implemented in low- and middle-income countries, namely in Ethiopia (2), India (2), Iran (1), Sierra Leone (1), Bangladesh (1), Nepal (1), and Turkey (1). Five interventions were implemented in the US and three were implemented Puerto Rico. Eight studies were implemented in the context of natural disasters, including storms (2), flooding (2), droughts (2), and earthquakes (2). The remaining studies reported on interventions carried out in the context of epidemics or a pandemic, namely Ebola (1), Zika (3), and COVID-19 (4). Sample sizes varied considerably between studies, ranging from 96 pregnant women in the context of COVID-19[51] to evaluations using administrative data for 29,221 women who received a reproductive health training programme in response to the Zika epidemic.[52–54]

[please insert Figure 2 about here]

### 3.2.2 Intervention types

The included studies covered interventions that can be broadly categorised into three types (see Figure 2 & 3): (i) economic empowerment, (ii) health promotion, and (iii) post-disaster resettlement. Five studies assessed *economic empowerment interventions*: three studies reported on microfinance interventions and financial aid (one cross-sectional, one case-control, and one experimental study) [55–57] and one cross-sectional study evaluated uptake of a food aid programme implemented in response to several major droughts in Ethiopia.[58] The fifth study, a randomised controlled trial conducted by Bandiera et al. (2019), assessed the impact of a multi-component intervention for young women and girls (aged 12-25 years) in the context of Ebola, featuring training on financial literacy and vocational skills, access to microfinance, and other non-economic programme components.[31]

The second broad intervention category was *health promotion programmes*, assessed in ten studies. The majority of these programmes were focused on promoting women’s reproductive health. One cross-sectional study described the “New Orleans Healthy Start” programme that was implemented shortly after Hurricane Katrina and aimed to improve prenatal care for pregnant women in communities with high infant mortality rates.[59] Another case-control study reported on a community-based health promotion intervention to expand access to health care for Nepalese mothers that were severely affected by the 2015 earthquake.[60] Three cross-sectional studies reported on Zika-focused interventions, including: (i) reproductive health training and counselling,[52–54,61] (ii) training of healthcare providers to increase the quality of contraceptive service provision,[52–54] and (iii) building of community awareness through a mass media campaign and distribution of Zika prevention kits.[62,63] Two cross-sectional studies, one cohort study, and one randomised controlled trial presented virtual or telehealth health interventions that were implemented in the context of the COVID-19 pandemic.[51,64–66] All but one of these were

1  
2  
3 focused on reproductive health. One health promotion intervention evaluated a psychosocial care  
4 programme for female survivors of the Tsunami in India in a case-control design.[67]  
5  
6

7  
8 One case-control study reported on a unique intervention that fell in neither of the above two  
9 categories: a post-disaster resettlement programme implemented in response to the Manjil  
10 earthquake in Iran, which involved the relocation and integration of some hard-hit villages to  
11 nearby locations.[68]  
12  
13  
14  
15  
16

17  
18 *[Please insert Table 1 about here]*  
19

20  
21 *[Please insert Figure 3 about here]*  
22  
23  
24  
25  
26

### 27 **3.2.3 Gender equality outcomes**

28  
29 Figure 3 displays the different outcome measures that were captured by included studies (see also  
30 Table 1 for detailed information from each study). The figure highlights important gaps: several  
31 outcome domains remain fully unaddressed in the context of PHEs, including: (i) harmful practices  
32 such as child marriage, (ii) water, sanitation, and hygiene management, (iii) unpaid work, (iv)  
33 women's social discrimination, and (v) women's access to information technology. It is further  
34 noteworthy that most assessed interventions (with the exception of Bandiera et al., 2019)[31] only  
35 targeted one gender equality domain.  
36  
37  
38  
39  
40  
41  
42  
43  
44  
45

46 The majority of included studies evaluated outcomes related to sexual and reproductive health: (i)  
47 (teenage) pregnancy, (ii) access to and use of modern contraceptives, (iii) sexual risk behaviours  
48 (e.g., unprotected, age-disparate sex, transactional sex), (iv) access to and satisfaction with prenatal  
49 care, (v) prenatal distress and pregnancy anxiety, (vi) reproductive healthcare counselling, and (vii)  
50 menstrual disorders.  
51  
52  
53  
54  
55  
56  
57  
58  
59  
60

1  
2  
3 Four studies assessed aspects of health equity, including sex-disaggregated malnutrition indicators  
4 and receipt of food aid,[69] women's psychological distress,[67] women's use of telehealth  
5 services,[64] and women's adoption of preventative health behaviours.[62] Two studies reported  
6  
7 on dimensions of equal opportunities, specifically capturing girls' school enrolment, their  
8 numeracy and literacy levels, and the engagement of school-aged girls in income generation  
9 activities (which can hamper their educational achievements),[31] as well as women's civic and  
10 political engagement.[70] Lastly, two studies assessed interventions on women's access to  
11 economic resources, specifically food aid membership uptake,[58] female employment,[68] and  
12 girl's financial literacy and entrepreneurial confidence,[31] and two studies focused on gender-  
13 based violence.[31,57]

### 3.3 Programme uptake, implementation, and results

#### *Economic empowerment*

34 The identified economic empowerment interventions sought to promote gender equality in five  
35 outcome domains: (i) gender-based violence, (ii) equal opportunities, (iii) reproductive health, (iv)  
36 access to economic resources, and (v) health equity (see Figure 3).

41 Azadi and colleagues (2017) assessed the uptake of a food aid programme among 479 residents in  
42 Tigray, Northern Ethiopia using a case-control design.[58] The authors reported higher  
43 membership rates among women, with 55% of female respondents receiving food aid compared to  
44 46% of male respondents. However, it remains unclear whether the differences in uptake were due  
45 to higher programme uptake among women or due to a higher baseline level of food insecurity  
46 among women. Because the study did not specify membership criteria or how households and  
47 individuals were sampled, the estimated uptake may be due to selection bias rather than true  
48 membership differences between men and women. The study did not examine food security or  
49 wider aspects of women's economic wellbeing.

1  
2  
3 The “Empowerment and Livelihood for Adolescents” (ELA) intervention implemented in Sierra  
4 Leone was successful in alleviating some of the negative impacts that the Ebola crisis had on girls’  
5 equal opportunities: in randomly assigned treatment villages, 8% of girls (aged 12-25 years) had  
6 dropped out of school, compared to 16% in control villages. Likewise, literacy and numeracy levels  
7 were higher for girls in treatment villages.[31] Further, the rate of girls engaged in child labour in  
8 the aftermath of the Ebola epidemic rose by 6% in treatment villages compared to 20% in control  
9 villages. The ELA intervention also generated beneficial impacts on reproductive health outcomes,  
10 including increases in girls’ condom use and a decrease in out-of-wedlock pregnancies. However,  
11 strikingly, the authors reveal *harmful* intervention effects on violence-related outcomes for the  
12 older age group. For the ELA intervention, the authors observe an increase in the prevalence of  
13 unwanted sex (by 5.3 percentage points) and transactional sex (by 5.4 percentage points) among  
14 women aged 18-25 years in villages that experienced high disruption due to the Ebola crisis,  
15 compared to women in control villages. [31]  
16  
17  
18  
19  
20  
21  
22  
23  
24  
25  
26  
27  
28  
29  
30  
31  
32

33 Christian and colleagues (2018) assessed, in a natural experiment, whether the “Odisha Rural  
34 Livelihoods Program”, consisting of self-help microcredit networks, mitigated some of the  
35 devastating economic impacts of the cyclone in Bengal, India. The analysis revealed the  
36 programme had no impact on household’s food expenditures but may have partly cushioned some  
37 of the cyclone’s negative effects on household expenditures. Specifically, women who participated  
38 in the self-help groups experienced smaller reductions in expenditures on women’s and children’s  
39 goods. Post-cyclone civic and political engagement did not differ for women who were part of the  
40 microcredit network.[55]  
41  
42  
43  
44  
45  
46  
47  
48  
49  
50  
51

52 The microfinance programme in Ethiopia evaluated in a cross-sectional study by Doocy and  
53 colleagues (2015) showed improvements in health equity in the context of droughts. Specifically,  
54 the odds of acute malnourishment among women in control communities were three times as high  
55 (OR=3.2, 95% CI: 1.1–9.8) compared to the odds of women who were established microfinance  
56  
57  
58  
59  
60

1  
2  
3 clients. The authors also note that the programme appeared to benefit female clients more than  
4  
5 male clients. The likelihood that male clients had received food aid in the past year was twice as  
6  
7 high relative to female clients, suggesting that the microfinance intervention substantially reduced  
8  
9 women's vulnerability to drought and food insecurity.[56]

10  
11  
12  
13 Lastly, Shahriara and colleagues (2019) analysed uptake of a microcredit programme targeted at  
14  
15 low-income women in Bangladesh using a case-control design. The authors surveyed women who  
16  
17 were first-time loan recipients and found that, among all women, experiencing domestic violence  
18  
19 was associated with lower odds of initiating a new business venture via reduced entrepreneurial  
20  
21 self-efficacy and fear of business failure. The authors further found that the magnitude of these  
22  
23 associations was larger for women who had recently experienced a PHE (flood, river bank erosion,  
24  
25 or cyclone in the last 12 months) compared to those who had not. The authors concluded therefore  
26  
27 that the negative association between domestic violence and women's entrepreneurial activities  
28  
29 (i.e., their usage of the microloan) were exacerbated by environmental disasters. However, it should  
30  
31 be noted that the authors did not provide the results of a direct comparison of these differential  
32  
33 associations (i.e., the interaction effect), limiting inferences around the magnitude of the  
34  
35 differences by PHE exposure.[57]

### 36 37 38 39 40 41 42 43 ***Health promotion***

44  
45  
46 Nine health promotion interventions that we identified were focused on the domain of sexual and  
47  
48 reproductive health. A community engagement health promotion intervention in Nepal resulted in  
49  
50 improvements in women's maternal health knowledge and healthcare seeking behaviour based on  
51  
52 a case-control evaluation. [60] For instance, the rate of institutional deliveries as well as antenatal  
53  
54 care visits were higher among mothers sampled post-intervention than in the group sampled before  
55  
56 the intervention.[60] However, the analysis relied on two different samples at baseline and follow-  
57  
58  
59  
60



1  
2  
3 up, whereby the latter sample had a higher proportion of mothers who scored better on a wealth  
4 index, which may have biased these comparisons.  
5  
6  
7

8 Three cross-sectional studies assessed reproductive health outcomes in the context of the Zika  
9 epidemic. Earle-Richardson et al. (2018) reported an assessment of four different interventions  
10 strategies to increase Zika prevention behaviours, including personal and home protection  
11 behaviours.[62] The study found mixed results for the interventions which included a Zika  
12 orientation, the provision of prevention kits, a public awareness campaign, and an offer of free  
13 residential mosquito spraying services. Personal protective behaviours including bed net, mosquito  
14 repellent and condom use were increased by exposure to interventions, while the offer of free  
15 spraying increased home or yard spraying but not other home protection behaviours. Exposure to  
16 the different interventions varied, with 93% of pregnant women surveyed reporting exposure to  
17 orientation, 75% to kit distribution, 51% to the awareness campaign, and 68% to free residential  
18 spraying. The reproductive health training delivered to women with a recent live birth in Puerto  
19 Rico resulted in higher condom use during pregnancy among women who had received prenatal  
20 provider counselling for Zika virus infection prevention.[61] The Zika Contraception Access  
21 Network was successful in reaching large populations of women with modern contraceptive (long  
22 active reversible contraceptive (LARC)) methods and social media health communication, securing  
23 a high level of user satisfaction and access to LARC removal.[52–54] Reach of the Zika  
24 Contraception Access Network was highest if awareness and information messages were delivered  
25 via Facebook.[63]  
26  
27  
28  
29  
30  
31  
32  
33  
34  
35  
36  
37  
38  
39  
40  
41  
42  
43  
44  
45  
46  
47  
48  
49

50 The “New Orleans Healthy Start” prenatal care programme, delivered after Hurricane Katrina,  
51 showed evidence of successful implementation: a greater proportion of pregnant women who  
52 engaged in the programme reported learning about each of the 11 components of prenatal care  
53 (e.g., smoking) compared to those who accessed traditional prenatal care.[59] These two groups of  
54 women did not differ in their reported satisfaction of their prenatal care (e.g., regarding waiting  
55  
56  
57  
58  
59  
60

1  
2  
3 time). Women who engaged in the Healthy Start programme were, in general, a higher-risk group,  
4 including reporting worse hurricane experiences and more post-traumatic stress. Giarratano et al.  
5 (2015) did not find evidence of an effect of the Healthy Start programme on a variety of pre- or  
6 post-natal outcomes, from birthweight to gestational diabetes. This was interpreted as a  
7 programmatic success given the higher risk among Healthy Start mothers; however, the study was  
8 designed to identify programme benefits not non-inferiority.[59]  
9  
10  
11  
12  
13  
14  
15  
16  
17  
18

19 One case-control study evaluated a psychosocial intervention that was targeted at female survivors  
20 of the tsunami disaster in India.[67] In affected communities, trained community workers delivered  
21 group sessions to female survivors who were encouraged to share their experiences and learn  
22 relaxation exercises. The intervention was associated with significant reductions in symptoms of  
23 psychological distress. Specifically, women who participated in the programme had 25% lower  
24 scores on the Impact of Event scale compared to women who had not participated.  
25  
26  
27  
28  
29  
30  
31  
32  
33  
34

35 Four interventions consisted of telehealth or e-health approaches that were implemented and  
36 scaled-up in the context of the COVID-19 pandemic. One telehealth intervention was delivered to  
37 patients in a Department of Otolaryngology–Head & Neck Surgery in Detroit, US. Using a cohort  
38 study design, the authors found that female patients were more likely than male patients to take-up  
39 virtual visits (OR = 1.71; 95% CI: 1.11-2.63).[64] Another telehealth intervention was focused on  
40 pre-natal care and targeted 96 pregnant women in Turkey, reporting significant drops in pre-natal  
41 distress ( $p=0.008$ ) and pregnancy related anxiety ( $p<0.001$ ) when comparing women who  
42 participated in the telehealth intervention with those in a control group.[51] Another cross-sectional  
43 study assessed uptake of and engagement with a virtual pre-natal care programme among 253  
44 pregnant women in the US, finding that 77.5% of participants were generally satisfied with the  
45 virtual care visits, 64.8% perceived the virtual visits as equally safe as in-person visits, and 36.1%  
46 had purchased a blood pressure cuff to take their measures at home.[66] A final telehealth  
47  
48  
49  
50  
51  
52  
53  
54  
55  
56  
57  
58  
59  
60

1  
2  
3 intervention was targeted at 331 adolescents in the US and took a broader focus on diverse health  
4 topics. With regards to gender-relevant outcomes, the cross-sectional study revealed that in 22%  
5 of all scheduled visits, adolescents sought help and advice on contraception or menstrual disorders,  
6 and in 6% of visits they sought advice on HIV treatment.[65]  
7  
8  
9  
10  
11  
12  
13

### 14 ***Resettlement***

15  
16 The case-control study by Badri and colleagues (2006) evaluated the outcomes of a planned  
17 resettlement programme that was implemented during the reconstruction period after the Manjil  
18 earthquake in Iran.[68] Drawing on data collected 11 years after the earthquake, the authors reveal  
19 that the resettlement policy hampered employment prospects of women who were hit by the  
20 earthquake and forced to relocate to another village. However, it needs to be cautioned that the  
21 authors present neither point estimates nor corresponding confidence interval for female  
22 employment rates, which makes a more detailed quantitative comparison of women in host  
23 communities and women in resettled communities impossible.  
24  
25  
26  
27  
28  
29  
30  
31  
32  
33  
34  
35  
36  
37

### 38 **3.4 Study designs and quality appraisal**

39  
40 Included studies varied substantially with regard to their research design and methodological  
41 approach to data analysis (see Figure 4). Causal inference about the intervention was only reliable  
42 in three studies, two of which were set up as a cluster randomised controlled trials [31,51] and one  
43 as a natural experiment, exploiting variation in the intensity with which communities were hit by  
44 a cyclone as well as the staggered rollout of a microcredit intervention.[55] Five studies relied on  
45 cohort or case-control designs to partly control for systematic variation in exposure to the  
46 intervention of interest,[52,60,64,67,68] and eight studies relied on cross-sectional, uncontrolled  
47 designs [53,54,56,58,59,62,65,66]. In five studies, participants were recruited based on random  
48 sampling procedures, [31,55,57,61,62]. Four studies relied on convenience sampling[59,60,67] and  
49  
50  
51  
52  
53  
54  
55  
56  
57  
58  
59  
60

1  
2  
3 three studies did not provide sufficient information on the sampling procedure [56,58,68]. Nine out  
4  
5 of sixteen studies provided detailed descriptions on the survey instruments and reported on using  
6  
7 validation procedures to adapt the questionnaire to the local context and language, or used  
8  
9 previously validated psychometric scales.[51,56–59,64–67] Conversely, in four studies, we judged  
10  
11 outcome measures to be susceptible to measurement error, either due to an increased risk of social  
12  
13 desirability bias for self-reported behaviours (e.g., condom use) in a face-to-face interview [31],  
14  
15 recall bias (e.g., time use), or failure to use (or report on using) validated or pre-piloted scales [60–  
16  
17 62]. There was also considerable heterogeneity between studies in terms of statistical rigour: three  
18  
19 studies did not present the corresponding standard deviations, standard errors, or confidence  
20  
21 intervals to their effect estimates and three studies presented only unadjusted outcome  
22  
23 analyses.[52–54,58,68]

24  
25  
26  
27  
28  
29 *[Please insert Figure 4 about here]*  
30  
31  
32  
33  
34

#### 35 **4. Discussion and Conclusion**

36  
37  
38 In this rapid scoping review, we sought to identify scientific evidence on strategies for promoting  
39  
40 gender equality during PHEs. In view of the multi-dimensional detrimental impacts that PHEs can  
41  
42 have on female empowerment and on women's societal status, this rapid scoping review reveals  
43  
44 important evidence gaps. Notably, none of our included studies examined interventions that  
45  
46 targeted sanitation and hygiene management, harmful practices (e.g., child marriage), workplace  
47  
48 or other forms of discrimination, or unpaid (care) work. More research on how to promote gender  
49  
50 equity in these domains during PHEs is urgently needed, especially in light of the ongoing COVID-  
51  
52 19 pandemic and its devastating socioeconomic consequences worldwide. In addition, although the  
53  
54 search string was set up to move beyond the gender binary, none of the identified studies  
55  
56  
57  
58  
59  
60

1  
2  
3 specifically targeted gender diverse or sexual minority participants. Hence, there is a dearth of  
4 evidence on how to effectively protect LGBTQIA\* populations in the context of PHEs.  
5  
6

7  
8 The studies that we have identified in this rapid scoping review highlighted positive associations  
9 between these interventions and women's and girls' sexual and reproductive health,[31,52–54,60]  
10 educational opportunities,[31] economic welfare,[31] and health equity in terms of  
11 (mal)nutrition.[56]  
12  
13  
14  
15  
16

17  
18 Two intervention strategies showed promise with regards to promoting gender equality during and  
19 after PHEs. First, two evaluation studies [52–54,62] presented large-scale governmental efforts for  
20 promoting sexual and reproductive health in the context of the Zika pandemic in Puerto Rico. Such  
21 efforts could be scaled-up to other countries and may also be highly relevant in the context of PHEs  
22 other than Zika. In view of the increasing rate of teenage pregnancies in the aftermath of previous  
23 PHEs,[32] ensuring uninterrupted access to modern contraceptives should be considered one of the  
24 key policy priorities. In response to lockdown orders, telehealth offers appear to be promising  
25 intervention strategies and have shown high levels of uptake and user satisfaction in the context of  
26 the COVID-19 pandemic.[51,64–66] Previous studies have already pointed to the suitability of  
27 telehealth interventions for supporting maternal care and women's and girls' sexual and  
28 reproductive health outside of public health emergencies.[71] As these services are scaled up in  
29 response to the COVID-19 pandemic, it is crucial that these are gender-sensitive and that sex-  
30 segregated outcomes are included for monitoring and evaluation purposes.[72] Second, economic  
31 empowerment programmes may be a crucial strategy for securing women's and girls' livelihoods  
32 in emergency settings. The impact of such programmes can go beyond economic aspects and may  
33 also decrease the risk of harmful coping behaviours such as marrying off a young daughter to  
34 receive a brideprice,[33] selling productive assets,[73] or engaging in risky sexual behaviour.[74]  
35  
36  
37  
38  
39  
40  
41  
42  
43  
44  
45  
46  
47  
48  
49  
50  
51  
52  
53  
54  
55  
56  
57  
58  
59  
60 One of the most widely used and promising tools to cushion the economic shock induced by a PHE  
are unconditional cash transfers. A rigorous evidence-base has already been established, suggesting

1  
2  
3 that unconditional cash transfers, in general, can improve food security, cognitive and physical  
4 child development, and stipulate business activities and educational attainment.[75,76] It is  
5 important to note that the gendered impacts of PHEs can vary substantially between cultural,  
6 political, and economic contexts, and thus between high and low-income countries. However, the  
7 COVID-19 pandemic has jeopardised gender equality worldwide and has also put a high burden  
8 on women in high-income countries that have successfully narrowed their gender gap in recent  
9 years.[4] Based on the evidence discussed in this rapid scoping review, there are important  
10 learnings to transport from low- and middle- to high-income countries. A first key lesson is the  
11 prioritisation of equitable access to services, including sexual and reproductive healthcare.[52–54]  
12 A second is the emphasis on women’s economic empowerment, which, in higher-income settings,  
13 may focus mostly on extended access to childcare services, uninterrupted income flows, and higher  
14 flexibility in working hours and project deadlines.[77] However, it needs to be cautioned that a  
15 “one-size-fits-all” approach does not exist and that more research on how to protect women’s  
16 and girls’ integrity and rights in the context of PHEs in both high- and low-income countries is  
17 urgently needed.

18  
19  
20  
21  
22  
23  
24  
25  
26  
27  
28  
29  
30  
31  
32  
33  
34  
35  
36  
37  
38 The lack of evidence demonstrated by this rapid scoping review likely reflects the associated risks  
39 and difficulties of conducting research and collecting data in PHE settings. Yet, our synthesis  
40 demonstrates that well-intended interventions may sometimes have unintended consequences and  
41 even induce harm. It is therefore essential that emergency mitigation efforts are accompanied by  
42 thorough monitoring and evaluation efforts and integrate feedback systems to stop or modify  
43 (unintended) harmful approaches and improve programme response. It is also important that  
44 rigorous monitoring and evaluation is applied to gender equality programmes delivered by different  
45 policy agents – including philanthropic organisations, larger international organisations, as well as  
46 national governments – so as to better understand which actors can most effectively intervene, and  
47 at which level. Indeed, one of the identified interventions reported a significant *increase* in violence  
48  
49  
50  
51  
52  
53  
54  
55  
56  
57  
58  
59  
60

1  
2  
3 against women, at least for some programme beneficiaries, post-intervention [31]. This  
4 corroborates previous evidence documenting that economic empowerment programmes may  
5 expose female beneficiaries to a higher risk of violence.[78,79] To this end, promising mitigation  
6 strategies in delivering economic strengthening programmes have included adding specific training  
7 and awareness raising on gender roles and stereotypes and engaging male spouses in these  
8 programme components [78,80–82]. Given the rarity of being able to exploit random variation in  
9 PHE settings, these efforts should include, wherever possible, measuring key confounders of the  
10 programme-outcome association (which can be determined in times of non-emergencies and based  
11 on existing literature) as well as using appropriate measurement procedures, including  
12 appropriately trained interviewers, safe and secure data collection and storage, and validated  
13 instruments. While causality is difficult to establish in the absence of experimental designs, rich  
14 qualitative data as well as mixed-methods analyses can help depict the channels through which a  
15 programme may induce improvements in gender equality outcomes.  
16  
17  
18  
19  
20  
21  
22  
23  
24  
25  
26  
27  
28  
29  
30  
31  
32

33 A number of limitations are noteworthy. First, our search strategy was set up with English search  
34 terms only and non-English publications were excluded. In addition, in light of the ongoing  
35 COVID-19 pandemic and the immediate demand for evidence-based policy strategies, we  
36 prioritised rapid evidence generation, over a more systematic search, by focusing only on published  
37 studies. Therefore, it is possible that our rapid scoping review did not capture some eligible  
38 programmes that were available only in grey literature outlets. Third, while we categorise reported  
39 coefficients for any of the intervention-outcome association as positive (+), negative (-), and neutral  
40 (0), they should not be interpreted as causal. Thirteen out of sixteen included studies were based  
41 on research designs that did not allow for causal inference on the intervention impacts. Lastly, we  
42 did not include qualitative data in this rapid scoping review in order to prioritise evidence with  
43 conclusions on intervention effectiveness. However, this is a valuable direction for future inquiry,  
44  
45  
46  
47  
48  
49  
50  
51  
52  
53  
54  
55  
56  
57  
58  
59  
60

1  
2  
3 to generate further insights into the mechanisms of change underlying effective programmes or  
4  
5 into the facilitating and inhibiting factors that explain interventions' successes and failures.  
6  
7  
8  
9

10 The current COVID-19 pandemic with its “triple hit to health, education and income” is projected  
11  
12 to severely slow down progress towards realising the SDGs by 2030.[83] The SDG5 for “Gender  
13  
14 Equality” is no exception, as emphasised by UN Secretary-General António Guterres: “*Limited*  
15  
16 *gains in gender equality and women’s rights made over the decades are in danger of being rolled*  
17  
18 *back due to the COVID-19 pandemic*”.[84] Findings from this rapid scoping review provide  
19  
20 preliminary support for economic empowerment programmes and focused sexual and reproductive  
21  
22 health to promote gender equality in the domains of sexual and reproductive health [31,52–  
23  
24 54,60,61], equal opportunities [31], and health equity [67,69]. However, this rapid scoping review  
25  
26 also uncovers important evidence gaps across all outcome domains of gender equality, particularly  
27  
28 with regards to the (i) prevention of harmful practices, (ii) adequate water, sanitation and hygiene  
29  
30 management, (iii) women’s time use and care burden, (iv) workplace and other discrimination, and  
31  
32 (v) access to technologies and economic resources. Concerted monitoring and evaluation efforts in  
33  
34 PHE settings are urgently needed to inform responsive and effective policy programmes.  
35  
36  
37  
38  
39  
40  
41  
42  
43  
44  
45  
46  
47  
48  
49  
50  
51  
52  
53  
54  
55  
56  
57  
58  
59  
60



1  
2  
3 **a. Contributorship statement:** JIS, AY, CA and JH conceptualised the study and developed the  
4 review protocol. BS ran the database searches. All authors screened abstracts and titles, and  
5 extracted and analysed the data with feedback from all authors. JIS drafted the first version of the  
6 manuscript and AY, CA, BS, and JH provided substantial revisions and feedback. All authors have  
7 read and approved the final version of the manuscript.  
8  
9

10 **b. Funding:** JIS is supported by the Joachim Herz Foundation. BS is supported by the Social  
11 Sciences and Humanities Research Council of Canada. ARY is supported by the Canadian  
12 Institutes of Health Research (HSI-166388).  
13  
14

15 **c. Competing interests:** The authors have no conflict of interest to disclose.  
16

17 **d. Acknowledgements:** We are grateful for funding from the Joachim Herz Foundation, the Social  
18 Sciences and Humanities Research Council of Canada, and the Canadian Institutes of Health  
19 Research.  
20

21 **e. Data sharing:** No additional data available.  
22

23 **f. Ethical Approval:** Not applicable.  
24  
25  
26  
27  
28  
29  
30  
31  
32  
33  
34  
35  
36  
37  
38  
39  
40  
41  
42  
43  
44  
45  
46  
47  
48  
49  
50  
51  
52  
53  
54  
55  
56  
57  
58  
59  
60

## References

- 1 Johns Hopkins University. COVID-19 Dashboard by the Center for Systems Science and Engineering (CSSE). 2020.<https://coronavirus.jhu.edu/map.html>
- 2 Wenham C, Smith J, Morgan R. COVID-19: the gendered impacts of the outbreak. *The Lancet* 2020;**395**:846–8. doi:10.1016/S0140-6736(20)30526-2
- 3 Fraser DE. Impact of COVID-19 Pandemic on Violence against Women and Girls. ;:16.
- 4 Alon T, Doepke M, Olmstead-Rumsey J, *et al.* The Impact of COVID-19 on Gender Equality. University of Bonn and University of Mannheim, Germany 2020. [https://ideas.repec.org/p/bon/bonrcr/crctr224\\_2020\\_163.html](https://ideas.repec.org/p/bon/bonrcr/crctr224_2020_163.html) (accessed 14 Dec 2020).
- 5 World Health Organization. Glossary of Humanitarian Terms. 2008.<https://www.who.int/hac/about/reliefweb-aug2008.pdf?ua=1>
- 6 Felten-Biermann C. Gender and Natural Disaster: Sexualized violence and the tsunami. *Development* 2006;**49**:82–6.
- 7 Davies SE, Bennett B. A gendered human rights analysis of Ebola and Zika: locating gender in global health emergencies. *International Affairs* 2016;**92**:1041–60. doi:<https://doi.org/10.1111/1468-2346.12704>
- 8 Peterman, A., Potts, A., O'Donnell, M., Thompson, K., Shah, N., Oertelt-Prigione, S., & van Gelder, N. *Pandemics and Violence Against Women and Children*. 2020.
- 9 Rao S. A natural disaster and intimate partner violence: Evidence over time. *Social Science & Medicine* 2020;**247**:112804. doi:10.1016/j.socscimed.2020.112804
- 10 First JM, First NL, Houston JB. Intimate partner violence and disasters: A framework for empowering women experiencing violence in disaster settings. *Affilia: Journal of Women & Social Work* 2017;**32**:390–403. doi:10.1177/0886109917706338
- 11 O'Brien M, Tolosa X. The effect of the 2014 West Africa Ebola virus disease epidemic on multi-level violence against women. *International Journal of Human Rights in Healthcare* 2016;**9**:151–60. doi:10.1108/IJHRH-09-2015-0027
- 12 Karamouzian M, Hategekimana C. Ebola treatment and prevention are not the only battles: understanding Ebola-related fear and stigma. *Int J Health Policy Manag* 2014;**4**:55–6. doi:10.15171/ijhpm.2014.128
- 13 Armbruster S, Klotzbücher V. Lost in lockdown? COVID-19, social distancing, and mental health in Germany. *Diskussionsbeiträge* 2020. <https://www.econstor.eu/handle/10419/218885> (accessed 14 Dec 2020).
- 14 Chandan JS, Taylor J, Bradbury-Jones C, *et al.* COVID-19: a public health approach to manage domestic violence is needed. *Lancet Public Health* Published Online First: 8 May 2020. doi:10.1016/S2468-2667(20)30112-2
- 15 Leslie E, Wilson R. Sheltering in place and domestic violence: Evidence from calls for service during COVID-19. *J Public Econ* 2020;**189**:104241. doi:10.1016/j.jpubeco.2020.104241
- 16 Ravindran S, Shah M. Unintended Consequences of Lockdowns: COVID-19 and the Shadow Pandemic. National Bureau of Economic Research 2020. doi:10.3386/w27562

- 1  
2  
3 17 Peterman, A., & O'Donnell, M. COVID-19 and Violence against Women and Children: A Second  
4 Research Round Up. 2020.  
5
- 6 18 Yakubovich AR, Stöckl H, Murray J, *et al.* Risk and Protective Factors for Intimate Partner  
7 Violence Against Women: Systematic Review and Meta-analyses of Prospective-Longitudinal Studies.  
8 *Am J Public Health* 2018;**108**:e1–11. doi:10.2105/AJPH.2018.304428  
9
- 10 19 Schneider D, Harknett K, McLanahan S. Intimate Partner Violence in the Great Recession.  
11 *Demography* 2016;**53**:471–505. doi:10.1007/s13524-016-0462-1  
12
- 13 20 Hall KS, Samari G, Garbers S, *et al.* Centring sexual and reproductive health and justice in the  
14 global COVID-19 response. *Lancet* 2020;**395**:1175–7. doi:10.1016/S0140-6736(20)30801-1  
15
- 16 21 Sochas L, Channon AA, Nam S. Counting indirect crisis-related deaths in the context of a low-  
17 resilience health system: the case of maternal and neonatal health during the Ebola epidemic in Sierra  
18 Leone. *Health Policy Plan* 2017;**32**:iii32–9. doi:10.1093/heapol/czx108  
19
- 20 22 McGinn. Reproductive health of war-affected populations: what do we know? *International*  
21 *Family Planning Perspectives* 2000;:174–80.  
22
- 23 23 Bloom-Feshbach K, Simonsen L, Viboud C, *et al.* Natality decline and miscarriages associated  
24 with the 1918 influenza pandemic: the Scandinavian and United States experiences. *J Infect Dis*  
25 2011;**204**:1157–64. doi:10.1093/infdis/jir510  
26
- 27 24 Wong SF, Chow KM, Leung TN, *et al.* Pregnancy and perinatal outcomes of women with severe  
28 acute respiratory syndrome. *Am J Obstet Gynecol* 2004;**191**:292–7. doi:10.1016/j.ajog.2003.11.019  
29
- 30 25 Nanda K, Lebetkin E, Steiner MJ, *et al.* Contraception in the Era of COVID-19. *Glob Health Sci*  
31 *Pract* 2020;**8**:166–8. doi:10.9745/GHSP-D-20-00119  
32
- 33 26 Rissa-Gill, I., & Finnegan, L. Children's Ebola Recovery Assessment: Sierra Leone, Save the  
34 Children. 2015.  
35
- 36 27 UNICEF. Monitoring and mitigating the secondary impacts of the coronavirus disease (COVID-  
37 19) pandemic on WASH services availability and access.  
38 2020.[https://www.unicef.org/documents/monitoring-and-mitigating-secondary-impacts-coronavirus-](https://www.unicef.org/documents/monitoring-and-mitigating-secondary-impacts-coronavirus-disease-covid-19-pandemic-wash)  
39 [disease-covid-19-pandemic-wash](https://www.unicef.org/documents/monitoring-and-mitigating-secondary-impacts-coronavirus-disease-covid-19-pandemic-wash)  
40  
41
- 42 28 Hennegan J, Shannon AK, Rubli J, *et al.* Women's and girls' experiences of menstruation in low-  
43 and middle-income countries: A systematic review and qualitative metasynthesis. *PLOS Medicine*  
44 2019;**16**:e1002803. doi:10.1371/journal.pmed.1002803  
45
- 46 29 Fuhrman S, Kalyanpur A, Friedman S, *et al.* Gendered implications of the COVID-19 pandemic  
47 for policies and programmes in humanitarian settings. *BMJ Global Health* 2020;**5**:e002624.  
48 doi:10.1136/bmjgh-2020-002624  
49
- 50 30 UN Women. Covid-19 and Violence Against Women and Girls: Addressing the Shadow  
51 Pandemic.  
52
- 53 31 Bandiera O, Buehren N, Goldstein M, *et al.* The economic lives of young women in the time of  
54 Ebola: lessons from an empowerment program. 2019;:80-pp.  
55
- 56 32 Burzynska K, Contreras G. Gendered effects of school closures during the COVID-19 pandemic.  
57 *Lancet* 2020;**395**:1968. doi:10.1016/S0140-6736(20)31377-5  
58  
59  
60

- 1  
2  
3 33 Corno L, Hildebrandt N, Voena A. Age of Marriage, Weather Shocks, and the Direction of  
4 Marriage Payments. *Econometrica* 2020;**88**:879–915. doi:<https://doi.org/10.3982/ECTA15505>  
5
- 6 34 Fawole OI, Bamiselu OF, Adewuyi PA, *et al.* Gender dimensions to the Ebola outbreak in  
7 Nigeria. *Ann Afr Med* 2016;**15**:7–13. doi:10.4103/1596-3519.172554  
8
- 9 35 Del Boca D, Oggero N, Profeta P, *et al.* Women’s and men’s work, housework and childcare,  
10 before and during COVID-19. *Rev Econ Household* Published Online First: 6 September 2020.  
11 doi:10/ghcrnv  
12
- 13 36 Boca DD, Oggero N, Profeta P, *et al.* Women’s work, housework, and childcare before and during  
14 COVID-19. VoxEU.org. 2020.[https://voxeu.org/article/women-s-work-housework-and-childcare-and-](https://voxeu.org/article/women-s-work-housework-and-childcare-and-during-covid-19)  
15 [during-covid-19](https://voxeu.org/article/women-s-work-housework-and-childcare-and-during-covid-19) (accessed 14 Dec 2020).  
16
- 17 37 Almudena Sevilla, Sarah Smith. Baby Steps: The Gender Division of Childcare during the  
18 COVID-19 Pandemic. 2020.[https://www.iza.org/publications/dp/13302/baby-steps-the-gender-](https://www.iza.org/publications/dp/13302/baby-steps-the-gender-division-of-childcare-during-the-covid-19-pandemic)  
19 [division-of-childcare-during-the-covid-19-pandemic](https://www.iza.org/publications/dp/13302/baby-steps-the-gender-division-of-childcare-during-the-covid-19-pandemic)  
20
- 21 38 International Labour Organisation. Impact of the COVID-19 crisis on loss of jobs and hours  
22 among domestic workers. 2020.  
23
- 24 39 International Labour Organisation. Women and men in the informal economy: a statistical brief.  
25 2019.  
26
- 27 40 Akseer N, Kandru G, Keats EC, *et al.* COVID-19 pandemic and mitigation strategies:  
28 implications for maternal and child health and nutrition. *Am J Clin Nutr* 2020;**112**:251–6.  
29 doi:10.1093/ajcn/nqaa171  
30
- 31 41 Hall KS, Samari G, Garbers S, *et al.* Centring sexual and reproductive health and justice in the  
32 global COVID-19 response. *The Lancet* 2020;**395**:1175–7. doi:10.1016/S0140-6736(20)30801-1  
33
- 34 42 Fawole OI, Bamiselu OF, Adewuyi PA, *et al.* Gender dimensions to the Ebola outbreak in  
35 Nigeria. *Ann Afr Med* 2016;**15**:7–13. doi:10.4103/1596-3519.172554  
36
- 37 43 Boniol M, McIsaac M, Xu L, *et al.* Gender equity in the health workforce: Analysis of 104  
38 countries. ;:8.  
39
- 40 44 Ryan NE, Ayadi AME. A call for a gender-responsive, intersectional approach to address  
41 COVID-19. *Global Public Health* 2020;**15**:1404–12. doi:10.1080/17441692.2020.1791214  
42
- 43 45 Dobbins M. *Rapid review guidebook: steps for conducting a rapid review*. Hamilton, ON:  
44 National Collaborating Centre for Methods and Tools 2017.  
45
- 46 46 Haffajee R, Parmet WE, Mello MM. What Is a Public Health “Emergency”? *New England*  
47 *Journal of Medicine* 2014;**371**:986–8. doi:10.1056/NEJMp1406167  
48
- 49 47 Nelson C, Lurie N, Wasserman J, *et al.* Conceptualizing and Defining Public Health Emergency  
50 Preparedness. *Am J Public Health* 2007;**97**:S9–11. doi:10.2105/AJPH.2007.114496  
51
- 52 48 Craig P, Dieppe P, Macintyre S, *et al.* Developing and evaluating complex interventions: the new  
53 Medical Research Council guidance. *BMJ* 2008;**337**:a1655. doi:10.1136/bmj.a1655  
54
- 55 49 Amrhein V, Greenland S, McShane B. Scientists rise up against statistical significance. *Nature*  
56 2019;**567**:305–7. doi:10.1038/d41586-019-00857-9  
57  
58  
59  
60

- 1  
2  
3 50 Wasserstein RL, Schirm AL, Lazar NA. Moving to a World Beyond “ $p < 0.05$ ”. *The American*  
4 *Statistician* 2019;**73**:1–19. doi:10.1080/00031305.2019.1583913  
5
- 6 51 Aksoy Derya Y, Altiparmak S, Akça E, *et al.* Pregnancy and birth planning during COVID-19:  
7 The effects of tele-education offered to pregnant women on prenatal distress and pregnancy-related  
8 anxiety. *Midwifery* 2021;**92**:102877. doi:10.1016/j.midw.2020.102877  
9
- 10 52 Lathrop E, Hurst S, Mendoza Z, *et al.* Final Program Data and Factors Associated With Long-  
11 Acting Reversible Contraception Removal: The Zika Contraception Access Network. *Obstetrics &*  
12 *Gynecology* 2020;**135**:1095–103. doi:10.1097/AOG.0000000000003835  
13
- 14 53 Lathrop E, Romero L, Hurst S, *et al.* The Zika Contraception Access Network: a feasibility  
15 programme to increase access to contraception in Puerto Rico during the 2016-17 Zika virus outbreak.  
16 *Lancet Public Health* 2018;**3**:e91–9. doi:10.1016/S2468-2667(18)30001-X  
17
- 18 54 Romero L, Koonin LM, Zapata LB, *et al.* Contraception as a Medical Countermeasure to Reduce  
19 Adverse Outcomes Associated With Zika Virus Infection in Puerto Rico: The Zika Contraception  
20 Access Network Program. *American journal of public health* 2018;**108**:S227–30.  
21 doi:10.2105/AJPH.2018.304558  
22
- 23 55 Christian P, Eeshani K, Nethra P, *et al.* Safety nets and natural disaster mitigation: evidence from  
24 cyclone Phailin in Odisha. 2018;:30-pp.  
25
- 26 56 Doocy S, Teferra S, Norell D, *et al.* Credit program outcomes: Coping capacity and nutritional  
27 status in the food insecure context of Ethiopia. *SOC SCI MED* 2005;**60**:2371–82.  
28 doi:10.1016/j.socscimed.2004.10.025  
29
- 30 57 Shahriar AM, Shepherd DA. Violence against women and new venture initiation with  
31 microcredit: Self-efficacy, fear of failure, and disaster experiences. *Journal of Business Venturing*  
32 2019;**34**. doi:10.1016/j.jbusvent.2019.06.006  
33
- 34 58 Azadi H, De Rudder F, Vlassenroot K, *et al.* Targeting International Food Aid Programmes: The  
35 Case of Productive Safety Net Programme in Tigray, Ethiopia. *Sustainability* 2017;**9**.  
36 doi:10.3390/su9101716  
37
- 38 59 Giarratano G, Harville EW, de Mendoza VB, *et al.* Healthy Start: Description of a Safety Net for  
39 Perinatal Support during Disaster Recovery. *Matern Child Health J* 2015;**19**:819–27.  
40 doi:10.1007/s10995-014-1579-8  
41
- 42 60 Dhital R, Silwal RC, Simkhada P, *et al.* Assessing knowledge and behavioural changes on  
43 maternal and newborn health among mothers following post-earthquake health promotion in Nepal.  
44 *PloS one* 2019;**14**:e0220191. doi:10.1371/journal.pone.0220191  
45
- 46 61 Essen BS von, Kortsmid K, Warner L, *et al.* Preventing sexual transmission of Zika virus infection  
47 during pregnancy, Puerto Rico, USA, 2016. *Emerging Infectious Diseases* 2019;**25**:2115–9.  
48
- 49 62 Earle-Richardson G, Prue C, Turay K, *et al.* Influences of Community Interventions on Zika  
50 Prevention Behaviors of Pregnant Women, Puerto Rico, July 2016–June 2017 - Volume 24, Number  
51 12—December 2018 - Emerging Infectious Diseases journal - CDC. doi:10.3201/eid2412.181056  
52
- 53 63 Powell R, Rosenthal J, August EM, *et al.* Ante La Duda, Pregunta: A Social Marketing Campaign  
54 to Improve Contraceptive Access during a Public Health Emergency. *Health Communication*  
55 2020;**0**:1–8. doi:10.1080/10410236.2020.1828534  
56  
57  
58  
59  
60

- 1  
2  
3 64 Darrat I, Tam S, Boulis M, *et al.* Socioeconomic Disparities in Patient Use of Telehealth During  
4 the Coronavirus Disease 2019 Surge. *JAMA Otolaryngol Head Neck Surg* 2021;**147**:287–95.  
5 doi:10.1001/jamaoto.2020.5161  
6
- 7 65 Wood SM, White K, Peebles R, *et al.* Outcomes of a Rapid Adolescent Telehealth Scale-Up  
8 During the COVID-19 Pandemic. *J Adolesc Health* 2020;**67**:172–8.  
9 doi:10.1016/j.jadohealth.2020.05.025  
10
- 11 66 Peahl AF, Powell A, Berlin H, *et al.* Patient and provider perspectives of a new prenatal care  
12 model introduced in response to the coronavirus disease 2019 pandemic. *American Journal of*  
13 *Obstetrics & Gynecology* 2021;**224**:384.e1-384.e11. doi:10.1016/j.ajog.2020.10.008  
14
- 15 67 Becker SM. Psychosocial Care for Women Survivors of the Tsunami Disaster in India. *Am J*  
16 *Public Health* 2009;**99**:654–8. doi:10.2105/AJPH.2008.146571  
17
- 18 68 Badri SA, Asgary A, Eftekhari AR, *et al.* Post-disaster resettlement, development and change: a  
19 case study of the 1990 Manjil earthquake in Iran. *Disasters* 2006;**30**:451–68.  
20
- 21 69 Doocy S, Teferra S, Norell D, *et al.* Credit program outcomes: coping capacity and nutritional  
22 status in the food insecure context of Ethiopia. *Social Science & Medicine* 2005;**60**:2371–82.  
23 doi:10.1016/j.socscimed.2004.10.025  
24
- 25 70 Christian P, Kandpal E, Palaniswamy N, *et al.* Safety nets and natural disaster mitigation:  
26 evidence from cyclone Phailin in Odisha. *Climatic Change* 2019;**153**:141–64.  
27
- 28 71 DeNicola N, Grossman D, Marko K, *et al.* Telehealth Interventions to Improve Obstetric and  
29 Gynecologic Health Outcomes. *Obstet Gynecol* 2020;**135**:371–82.  
30 doi:10.1097/AOG.0000000000003646  
31
- 32 72 Monaghesh E, Hajizadeh A. The role of telehealth during COVID-19 outbreak: a systematic  
33 review based on current evidence. *BMC Public Health* 2020;**20**:1–9. doi:10.1186/s12889-020-09301-4  
34
- 35 73 Orkin, Kate. The evidence behind putting money directly in the pockets of the poor.  
36 2020.<https://www.ox.ac.uk/news/science-blog/evidence-behind-putting-money-directly-pockets-poor>  
37
- 38 74 Pronyk PM, Hargreaves JR, Kim JC, *et al.* Effect of a structural intervention for the prevention of  
39 intimate-partner violence and HIV in rural South Africa: a cluster randomised trial. *The Lancet*  
40 2006;**368**:1973–83. doi:10.1016/S0140-6736(06)69744-4  
41
- 42 75 Baird S, McKenzie D, Özler B. The effects of cash transfers on adult labor market outcomes. *IZA*  
43 *Journal of Development and Migration* 2018;**8**:22. doi:10.1186/s40176-018-0131-9  
44
- 45 76 Evans DK, Hausladen S, Kosec K, *et al.* Community-Based Conditional Cash Transfers in  
46 Tanzania : Results from a Randomized Trial. The World Bank 2014. [https://ideas.repec.org/cgi-bin/htsearch?ul=&q=%28saving++%7C+micro-saving+%7Cmicrosaving+%7C+Aflatoun+%7C+YouthSafe+%29+%2B+%28%E2%80%9Crandomized+control\\*+trial%E2%80%9D+%7C++%E2%80%9Crandomised+control\\*+trial%E2%80%9D+%7C++randomised+%7C++randomized+%7C++RCT+%7C+++trial+%7C+experiment\\*+%29+&cmd=Search%21&wf=4BFF&s=R&dt=range&db=01%2F01%2F1990&de=&m=all&fmt=long&sy=1&ps=50](https://ideas.repec.org/cgi-bin/htsearch?ul=&q=%28saving++%7C+micro-saving+%7Cmicrosaving+%7C+Aflatoun+%7C+YouthSafe+%29+%2B+%28%E2%80%9Crandomized+control*+trial%E2%80%9D+%7C++%E2%80%9Crandomised+control*+trial%E2%80%9D+%7C++randomised+%7C++randomized+%7C++RCT+%7C+++trial+%7C+experiment*+%29+&cmd=Search%21&wf=4BFF&s=R&dt=range&db=01%2F01%2F1990&de=&m=all&fmt=long&sy=1&ps=50)  
47 (accessed 2 Mar 2016).  
48
- 49 77 Witteman HO, Haverfield J, Tannenbaum C. COVID-19 gender policy changes support female  
50 scientists and improve research quality. *PNAS* 2021;**118**. doi:10.1073/pnas.2023476118  
51  
52  
53  
54  
55  
56  
57  
58  
59  
60

- 1  
2  
3 78 Eggers Del Campo I, Steinert JI. The Effect of Female Economic Empowerment Interventions on  
4 the Risk of Intimate Partner Violence: A Systematic Review and Meta-Analysis. *Trauma Violence*  
5 *Abuse* 2020;:1524838020976088. doi:10.1177/1524838020976088  
6
- 7 79 Vyas S, Watts C. How does economic empowerment affect women's risk of intimate partner  
8 violence in low and middle income countries? A systematic review of published evidence. *Journal of*  
9 *International Development* 2009;21:577–602. doi:https://doi.org/10.1002/jid.1500  
10
- 11 80 Halim N, Steven Mzilangwe E, Reich N, *et al.* Together to end violence against women in  
12 Tanzania: Results of a pilot cluster randomized controlled trial to evaluate preliminary effectiveness of  
13 interpersonal and community level interventions to address intimate partner violence. *Glob Public*  
14 *Health* 2019;14:1653–68. doi:10.1080/17441692.2019.1609062  
15
- 16 81 Iyengar R, Ferrari G. *Comparing Economic and Social Interventions to Reduce Intimate Partner*  
17 *Violence: Evidence from Central and Southern Africa*. University of Chicago Press  
18 [https://chicago.universitypressscholarship.com/view/10.7208/chicago/9780226316192.001.0001/upso-](https://chicago.universitypressscholarship.com/view/10.7208/chicago/9780226316192.001.0001/upso-9780226316055-chapter-6)  
19 [9780226316055-chapter-6](https://chicago.universitypressscholarship.com/view/10.7208/chicago/9780226316192.001.0001/upso-9780226316055-chapter-6) (accessed 14 Dec 2020).  
20  
21
- 22 82 Gupta J, Falb KL, Lehmann H, *et al.* Gender norms and economic empowerment intervention to  
23 reduce intimate partner violence against women in rural Côte d'Ivoire: a randomized controlled pilot  
24 study. *BMC Int Health Hum Rights* 2013;13:46. doi:10.1186/1472-698X-13-46  
25
- 26 83 Chandan JS, Taylor J, Bradbury-Jones C, *et al.* COVID-19: a public health approach to manage  
27 domestic violence is needed. *The Lancet Public Health* 2020;0. doi:10.1016/S2468-2667(20)30112-2  
28
- 29 84 United Nations. Goal 5: Achieve gender equality and empower all women and girls – COVID-19  
30 Response. 2020. <https://www.un.org/sustainabledevelopment/gender-equality/>  
31  
32  
33  
34  
35  
36  
37  
38  
39  
40  
41  
42  
43  
44  
45  
46  
47  
48  
49  
50  
51  
52  
53  
54  
55  
56  
57  
58  
59  
60

1  
2  
3 **Figure Legends**  
4  
5  
6

7 Figure 1. Review flow chart  
8

9  
10 Figure 2: Geographic scope and intervention types of included studies  
11  
12

13 Figure 3. Summary of intervention effects by outcome type  
14  
15

16 Figure 4. Quality appraisal  
17  
18  
19  
20  
21  
22  
23  
24  
25  
26  
27  
28  
29  
30  
31  
32  
33  
34  
35  
36  
37  
38  
39  
40  
41  
42  
43  
44  
45  
46  
47  
48  
49  
50  
51  
52  
53  
54  
55  
56  
57  
58  
59  
60

For peer review only



Tables

Table 1. Characteristics of Included Studies

| Study                 | Country      | Type of PHE | Intervention Type                                      | Outcome                                                                                                                                                                                                                                                                                                             | Research Design             | Type of Evaluation              | Study Sample                                                                                              |
|-----------------------|--------------|-------------|--------------------------------------------------------|---------------------------------------------------------------------------------------------------------------------------------------------------------------------------------------------------------------------------------------------------------------------------------------------------------------------|-----------------------------|---------------------------------|-----------------------------------------------------------------------------------------------------------|
| Azadi et al. 2017     | Ethiopia     | Drought     | Economic empowerment:<br>Food aid membership           | <b>Access to economic resources:</b><br>Food aid programme membership                                                                                                                                                                                                                                               | Cross-sectional study       | Evaluation of programme uptake  | 479 households in villages (1 respondent per household)                                                   |
| Badri et al. 2006     | Iran         | Earthquake  | Policy of involuntary planned resettlement             | <b>Access to economic resources:</b><br>Female general employment, female employment in governmental jobs, women’s travel time to work                                                                                                                                                                              | Case-control study          | Evaluation of programme effects | 64 relocated communities, 129 host communities                                                            |
| Bandiera et al. 2019  | Sierra Leone | Ebola       | Economic empowerment and reproductive health education | <b>Equal opportunities:</b><br>School enrolment, income generation activities, literacy, numeracy, entrepreneurial confidence, financial literacy<br><b>Violence:</b><br>Unwanted sex<br><b>Reproductive health:</b><br>Time spent with men, condom use, frequency of unprotected sex, transactional sex, pregnancy | RCT                         | Evaluation of programme effects | Intervention: 150 villages/3592 girls 12-25 years, Control: 50 villages/1198 girls control 12-25 years    |
| Becker 2009           | India        | Tsunami     | Psychosocial care                                      | Psychological distress                                                                                                                                                                                                                                                                                              | Case control study          | Evaluation of programme effects | Intervention: 100 female survivors of the 2004 tsunami, Control: 100 female survivors of the 2004 tsunami |
| Christian et al. 2018 | India        | Cyclone     | Economic empowerment:<br>Financial aid                 | <b>Equal opportunities:</b><br>Political knowledge, attendance of village meeting, voting in village council                                                                                                                                                                                                        | Natural experiment          | Evaluation of programme effects | 2874 households                                                                                           |
| Darrat et al. 2021    | USA          | COVID-19    | Telehealth intervention                                | <b>Health equity between men and women:</b><br>Participation in telehealth care programme                                                                                                                                                                                                                           | Cohort study                | Evaluation of programme uptake  | 1162 paediatric and adult patient at Department of Otolaryngology–Head & Neck Surgery                     |
| Derya et al. 2021     | Turkey       | COVID-19    | Pre-natal Telehealth intervention                      | <b>Reproductive health:</b><br>Prenatal distress, pregnancy anxiety                                                                                                                                                                                                                                                 | Randomised controlled trial | Evaluation of programme effects | 96 pregnant women                                                                                         |
| Dhital et al. 2019    | Nepal        | Earthquake  | Community-based health promotion                       | <b>Reproductive health:</b><br>Maternal and child health knowledge, health care seeking (ANC visits + institutional delivery)                                                                                                                                                                                       | Case-control study          | Evaluation of programme effects | 364 women of reproductive age at baseline, 377 women of reproductive age at endline                       |
| Doocy et al. 2005     | Ethiopia     | Drought     | Economic empowerment:<br>Microcredit                   | <b>Health equity between men and women:</b> Malnutrition and receipt of food aid                                                                                                                                                                                                                                    | Cross-sectional study       | Evaluation of programme effects | 164 established female microfinance clients 164, 99 new clients, 89 control women                         |

|                              |                  |                                                            |                                                           |                                                                                                                                                                                             |                       |                                                                                               |                                                                                                                                                            |
|------------------------------|------------------|------------------------------------------------------------|-----------------------------------------------------------|---------------------------------------------------------------------------------------------------------------------------------------------------------------------------------------------|-----------------------|-----------------------------------------------------------------------------------------------|------------------------------------------------------------------------------------------------------------------------------------------------------------|
| Earle-Richardson et al. 2018 | Puerto Rico      | Zika                                                       | Health education (focused on Zika prevention)             | <b>Reproductive health:</b><br>condom use, sexual abstinence<br><br>Receipt of program, vector control behaviour (e.g., repellent use, bednet use, wearing long sleeves)                    | Cross-sectional study | Evaluation of programme implementation and effects                                            | 1329 pregnant women                                                                                                                                        |
| Essen et al. 2019            | Puerto Rico, USA | Zika                                                       | Reproductive health training (focused on Zika prevention) | <b>Reproductive health:</b><br>Condom use                                                                                                                                                   | Cross-sectional study | Evaluation of programme effects                                                               | 2364 women with a recent live birth                                                                                                                        |
| Giarratano et al. 2015       | USA              | Hurricane                                                  | Reproductive Health Training                              | <b>Reproductive health:</b><br>Perceptions of prenatal care, prenatal health behaviors (e.g., drug use, vitamin consumption), birth outcomes (e.g., low birthweight, preterm birth, anemia) | Cross-sectional study | Evaluation of programme uptake, implementation and effects through process/ programme effects | 402 prenatal women (24-40 weeks) from prenatal clinics and classes (282 experiencing only traditional PNC, while 120 received the additional intervention) |
| Lathrop et al. 2018*         | Puerto Rico      | Zika                                                       | Reproductive Health Training                              | <b>Reproductive health:</b><br>Proportion of women receiving same-day contraceptive services, proportion of women selecting LARC method                                                     | Cross-Sectional Study | Evaluation of programme effect/process                                                        | 3294 women                                                                                                                                                 |
| Lathrop et al. 2020*         | Puerto Rico      | Zika                                                       | Reproductive Health Training                              | <b>Reproductive health:</b><br>LARC removal                                                                                                                                                 | Cohort study          | Evaluation of programme uptake                                                                | 29,221 women who participated throughout the life of the program                                                                                           |
| Peahl et al. 2021            | USA              | COVID-19                                                   | Pre-natal Virtual Care Intervention                       | <b>Reproductive health:</b><br>Number of women accessing pre-natal care programme, satisfaction with pre-natal care services, use of home devices for blood pressure measurement            | Cross-Sectional Study | Evaluation of programme uptake/process                                                        | 253 pregnant women                                                                                                                                         |
| Powell et al. 2020*          | Puerto Rico      | Zika                                                       | Social Marketing Reproductive Health Campaign             | <b>Reproductive health:</b><br>Views/clicks/likes for online campaign content                                                                                                               | Cross-Sectional Study | Evaluation of programme uptake                                                                | Website and social media users                                                                                                                             |
| Romero et al. 2015*          | Puerto Rico      | Zika                                                       | Reproductive Health Training                              | <b>Reproductive health:</b><br>Number of women receiving Zika prevention services, reach of awareness campaign                                                                              | Cross-Sectional Study | Evaluation of programme uptake/process                                                        | Unclear                                                                                                                                                    |
| Shahriar et al. 2019         | Bangladesh       | Flood, River bank erosion, cyclone (in the past 12 months) | Economic empowerment: Microcredit                         | <b>Domestic Violence</b>                                                                                                                                                                    | Case Control Study    | Evaluation of programme uptake                                                                | 583 women between ages 18-45 who were first-time loan recipient                                                                                            |
| Wood et al. 2020             | USA              | COVID-19                                                   | Telehealth intervention                                   | <b>Sexual and reproductive health:</b><br>Access to/counselling on contraception, HIV, menstrual disorders                                                                                  | Cross-sectional Study | Evaluation of programme uptake                                                                | 331 adolescents                                                                                                                                            |

\*Studies report on the same intervention

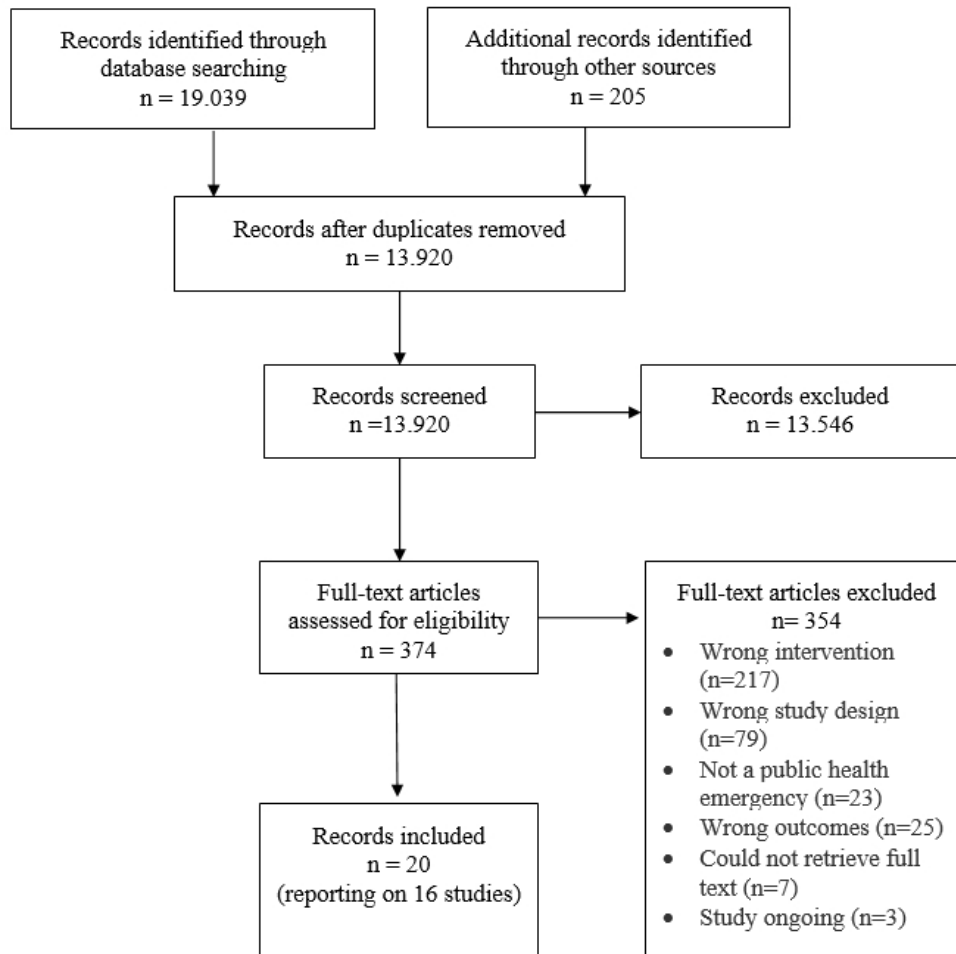

Review flow chart

302x295mm (57 x 57 DPI)

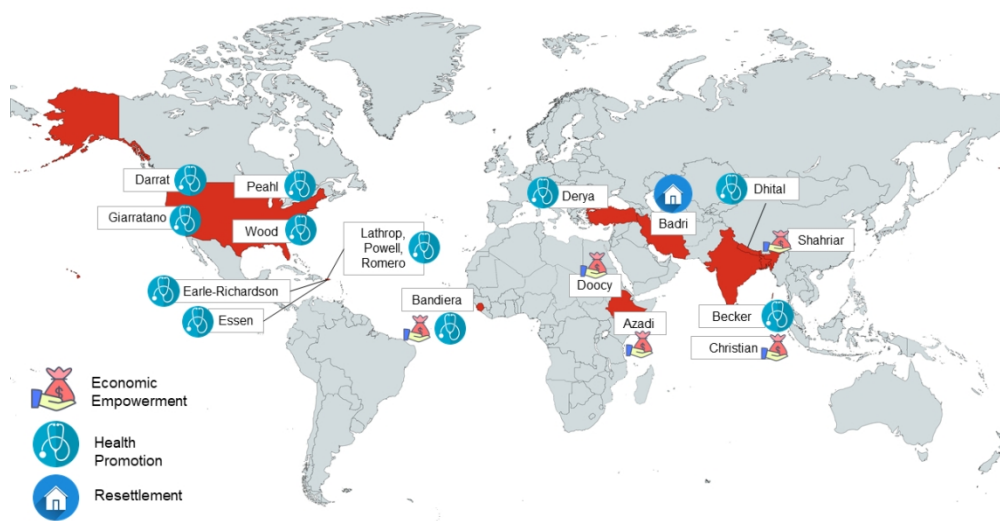

Geographic scope and intervention types of included studies

850x439mm (38 x 38 DPI)

| Intervention Type    | Study                                                           | SDG Outcomes Framework |                    |                                    |                          |                                        |                    |                                            |                                              |                               |                      |  |  |  |  |
|----------------------|-----------------------------------------------------------------|------------------------|--------------------|------------------------------------|--------------------------|----------------------------------------|--------------------|--------------------------------------------|----------------------------------------------|-------------------------------|----------------------|--|--|--|--|
|                      |                                                                 | 1. No poverty (GPI)    | 5. Gender equality | 8. Decent work and economic growth | 10. Reduced inequalities | 11. Sustainable cities and communities | 13. Climate action | 16. Peace, justice and strong institutions | 17. Partnerships for sustainable development | 3. Good health and well-being | 4. Quality education |  |  |  |  |
| Economic Empowerment | Azadi et al. 2017                                               |                        |                    |                                    |                          |                                        |                    |                                            |                                              |                               |                      |  |  |  |  |
|                      | Bandiera et al. 2019                                            | -                      |                    |                                    |                          |                                        |                    |                                            |                                              |                               |                      |  |  |  |  |
|                      | Christian et al. 2018                                           |                        |                    |                                    |                          |                                        |                    |                                            |                                              |                               |                      |  |  |  |  |
|                      | Doocy et al. 2005                                               |                        |                    |                                    |                          |                                        |                    |                                            |                                              |                               |                      |  |  |  |  |
|                      | Shahriar et al. 2019                                            | U                      |                    |                                    |                          |                                        |                    |                                            |                                              |                               |                      |  |  |  |  |
| Health Promotion     | Becker 2009                                                     |                        |                    |                                    |                          |                                        |                    |                                            |                                              |                               |                      |  |  |  |  |
|                      | Darrat et al. 2021                                              |                        |                    |                                    |                          |                                        |                    |                                            |                                              |                               |                      |  |  |  |  |
|                      | Derya et al. 2021                                               |                        |                    |                                    |                          |                                        |                    |                                            |                                              |                               |                      |  |  |  |  |
|                      | Dhital et al. 2019                                              |                        |                    |                                    |                          |                                        |                    |                                            |                                              |                               |                      |  |  |  |  |
|                      | Earle-Richardson et al. 2018                                    |                        |                    |                                    |                          |                                        |                    |                                            |                                              |                               |                      |  |  |  |  |
|                      | Essen et al. 2019                                               |                        |                    |                                    |                          |                                        |                    |                                            |                                              |                               |                      |  |  |  |  |
|                      | Giarratano et al. 2015                                          |                        |                    |                                    |                          |                                        |                    |                                            |                                              |                               |                      |  |  |  |  |
|                      | Powell et al. 2020; Lathrop et al. 2020/18 & Romero et al. 2015 |                        |                    |                                    |                          |                                        |                    |                                            |                                              |                               |                      |  |  |  |  |
| Peahli et al. 2021   |                                                                 |                        |                    |                                    |                          |                                        |                    |                                            |                                              |                               |                      |  |  |  |  |
| Wood et al. 2020     |                                                                 |                        |                    |                                    |                          |                                        |                    |                                            |                                              |                               |                      |  |  |  |  |
| Resettlement         | Badri et al. 2006                                               |                        |                    |                                    |                          |                                        |                    |                                            |                                              |                               |                      |  |  |  |  |

Summary of intervention effects by outcome type

604x268mm (57 x 57 DPI)

1  
2  
3  
4  
5  
6  
7  
8  
9  
10  
11  
12  
13  
14  
15  
16  
17  
18  
19  
20  
21  
22  
23  
24  
25  
26  
27  
28  
29  
30  
31  
32  
33  
34  
35  
36  
37  
38  
39  
40  
41  
42  
43  
44  
45  
46  
47  
48  
49  
50  
51  
52  
53  
54  
55  
56  
57  
58  
59  
60

| Research Design                         | Study                                                       | Sampling                                                    | Measurement Procedures                                 | Statistical Analysis -Type                                              | Adjusted                 |
|-----------------------------------------|-------------------------------------------------------------|-------------------------------------------------------------|--------------------------------------------------------|-------------------------------------------------------------------------|--------------------------|
| Experimental/quasi-experimental studies | Bandiera et al. 2019                                        | Random sampling                                             | Susceptible to measurement error                       | ANCOVA                                                                  | yes                      |
|                                         | Christian et al. 2018                                       | Random sampling                                             | <i>Insufficient reporting</i>                          | Triple difference-in-difference                                         | yes                      |
|                                         | Derray et al. 2021                                          | Non-probability sampling                                    | Good quality                                           | T-Test                                                                  | no (but balanced groups) |
| Non-randomised controlled studies       | Badi et al. 2006                                            | <i>Insufficient reporting</i>                               | <i>Insufficient reporting</i>                          | Frequency comparisons, point estimates only                             | no                       |
|                                         | Becker 2009                                                 | Convenience sampling                                        | Good quality                                           | T-tests comparing pre- and post-test data                               | yes                      |
|                                         | Darrat et al. 2021                                          | Full sample of patients in specific care department         | Good quality                                           | Multivariate logistic regression                                        | yes                      |
|                                         | Dhital et al. 2019                                          | Convenience sampling                                        | Susceptible to measurement error                       | Chi-square tests & multivariate logistic regression                     | yes                      |
|                                         | Shahriar et al. 2019                                        | Random sampling                                             | Good quality                                           | Moderated mediation regression                                          | yes                      |
| Cross-sectional                         | Azadi et al. 2017                                           | <i>Insufficient reporting</i>                               | Good quality                                           | Frequency comparisons, point estimates only                             | no                       |
|                                         | Doocy et al. 2005                                           | <i>Insufficient reporting</i>                               | Good quality                                           | Multivariate logistic regression                                        | yes                      |
|                                         | Earle-Richardson et al. 2018                                | Random sampling                                             | Susceptible to measurement error                       | Multivariate logistic regression                                        | yes                      |
|                                         | Essen et al. 2019                                           | Random sampling                                             | Susceptible to measurement error                       | ANOVA                                                                   | yes                      |
|                                         | Giarratano et al. 2015                                      | Convenience sampling                                        | Good quality                                           | Chi-square tests & t-tests& multivariate linear and logistic regression | yes                      |
|                                         | Powell 2020; Lathrop et al. 2020; 2018 & Romero et al. 2015 | Clinics: Full sample / Survey: Convenience sampling         | Medium quality (no validation/pre-testing of measures) | Frequency comparisons, point estimates only                             | no                       |
|                                         | Peahle et al. 2021                                          | Selective sample of patients participating in online survey | Good quality                                           | Frequency comparisons, point estimates only                             | no                       |
| Wood et al. 2020                        | <i>Insufficient reporting</i>                               | Good quality                                                | Frequency comparisons, point estimates only            | no                                                                      |                          |

Suitability for Causal Inference

Quality appraisal

655x268mm (57 x 57 DPI)

## Appendix

Table A1. Search String (MEDLINE)

|                                                                    |                                                                                                                                                                                                                                                                                                                                                                                                                                                                                                                                                                                                                                                                                                                                                                                                                                                                                                                                                                                                                                                                                                                                                                                                                                                                                                                                                                                                                                                                                                            |
|--------------------------------------------------------------------|------------------------------------------------------------------------------------------------------------------------------------------------------------------------------------------------------------------------------------------------------------------------------------------------------------------------------------------------------------------------------------------------------------------------------------------------------------------------------------------------------------------------------------------------------------------------------------------------------------------------------------------------------------------------------------------------------------------------------------------------------------------------------------------------------------------------------------------------------------------------------------------------------------------------------------------------------------------------------------------------------------------------------------------------------------------------------------------------------------------------------------------------------------------------------------------------------------------------------------------------------------------------------------------------------------------------------------------------------------------------------------------------------------------------------------------------------------------------------------------------------------|
| <p>#1</p> <p>[public health emergencies and response measures]</p> | <p>pandemic* OR epidemic* OR (disease adj2 outbreak*) OR (disease adj2 transmission) OR (public health adj2 emergenc*) OR (public health adj2 disaster*) OR (humanitarian adj2 emergenc*) OR (humanitarian adj2 disaster*) OR (catastrophic event*) OR (humanitarian adj2 catastroph*) OR (public health adj2 catastroph*) OR (natural adj2 disaster*) OR (disaster adj2 victim*) OR (natural adj2 hazard) OR (natural adj2 catastroph*) OR tsunami* OR earthquake* OR flood* OR hurricane* OR cyclone* OR tornado* OR avalanche OR cyclone* OR typhoon* OR monsoon* OR landslide* OR volcanic eruption OR draught* OR famine* OR (crop failure) OR (crop shortfall*) OR (crop shortage*) OR infestation* OR (severe acute respiratory syndrome) OR SARS OR (swine flu) OR H1N1 OR polio OR ebola OR zika OR (Middle Eastern Respiratory Syndrome) OR MERS OR MERS-CoV OR coronavirus OR Corona OR COVID-19 OR SARS-CoV-2 OR 2019-nCoV OR Ebola OR ebolavirus OR EVD OR cholera OR chikungunya OR (Crimean-Congo haemorrhagic fever) OR influenza OR (Lassa fever) OR (Marburg virus disease) OR meningitis OR monkeypox OR (Nipah virus infection) OR (Nipah virus) OR plague OR (rift valley fever) OR (rift valley adj2 disease) OR tularemia OR (yellow fever) OR quarantine* OR (social isolation) OR (physical isolation) OR (social distanc*) OR (physical distanc*) OR (shelter in place) OR lockdown* OR shutdown*</p>                                                                            |
| <p>#2 [Outcomes]</p>                                               | <p>[Discrimination aspect]</p> <p>sexism OR ((women OR woman OR girl* OR female* OR gender OR transgender OR transwoman OR transwomen OR (trans?feminine) OR (trans?female*) OR sex*) adj6 (inequalit* OR equalit* OR inequit* OR equit* OR discriminat* OR bias OR (differential treatment) OR (preferential treatment) OR disadvantage OR prejudic*)) OR (gender adj4 (norm OR norms OR normative OR attitude* OR belief*))</p> <p>[Violence aspect]</p> <p>GBV OR VAW OR VAWG OR IPV OR ((women OR woman OR girl* OR female* OR gender OR transgender OR transwoman OR transwomen OR (trans?feminine) OR (trans?female*) OR wife OR wives OR husband* OR dating OR partner* OR relationship OR family OR married OR marriage OR domestic OR sex*) adj6 (violence OR violent OR abuse OR abusive OR victim* OR harass* OR assault* OR maltreat* OR aggress* OR batter* OR beat* OR hit* OR homicide* OR murder* OR injury OR injuries OR (coercive control) OR (controlling behaviour) OR (controlling behavior) OR rape OR traffick* OR exploit* OR safety OR danger OR fear)) OR (force* adj2 sex) OR (coerc* adj2 sex) OR (unwanted adj2 sex) OR rape OR raped OR rapes OR raping</p> <p>[Harmful practices aspect]</p> <p>(child bride) OR childbride OR (child marriage) OR (underage* marriage) OR (under age marriage) OR (forced marriage) OR (early marriage) OR (adolescent marriage) OR (female genital mutilation) OR (female genital cutting) OR FGM OR FGC</p> <p>[Unpaid Work aspect]</p> |

(care burden) OR (child care) OR childcare OR (unpaid work) OR (time allocation) OR (house work) OR housework OR (domestic work) OR (domestic chore\*) OR homemaker\*

[Equal opportunities aspect] (women OR woman OR girl\* OR female\* OR gender OR transgender OR transwoman OR transwomen OR (trans?feminine) OR (trans?female\*)) adj6 [(empower\* OR agency OR emancipat\* OR vote OR voting OR (social capital) OR school\* OR education\* OR grade retention OR cognitive development OR literacy OR numeracy) OR ((political OR society OR societal OR community OR communities OR equal\* OR equit\* OR household OR organization\* OR business\*) adj3 (participation OR (decision making) OR (decision-making) OR represent\* OR leader\* OR influence OR opportunit\* OR manage\*))]

[Economic participation aspect]

((women OR woman OR girl\* OR female\* OR gender OR transgender OR transwoman OR transwomen OR (trans?feminine) OR (trans?female\*)) adj4 ((labo?r market) OR employ\* OR unemploy\* OR (work) OR (job) OR (labo?r protection) OR (labo?r supply) OR income\* OR earning\* OR wage\* OR salary OR salarie\* OR asset\* OR expenditure\* OR consumption OR saving\* OR credit OR (financial inclusion) OR (account holder) OR (account ownership) OR entrepreneurship)) OR (wage gap) OR (salary gap) OR (pay gap)

[ICT aspect]

(women OR woman OR girl\* OR female\* OR gender OR transgender OR transwoman OR transwomen OR (trans?feminine) OR (trans?female\*)) adj6 ((information AND communication) OR (information technology) OR (communication technology) OR (IT skills) OR (Internet access) OR ICT OR (SIM card) OR (mobile phone) OR (cell\* phone) OR (phone subscription) OR (phone network) OR radio OR television OR telephone OR (local area network) OR LAN OR extranet OR (World Wide Web) OR (mobile money) OR (mobile banking) OR computing OR e-commerce OR (enabling technology) OR technolog\*)

[WASH aspect]

((women OR woman OR girl\* OR female\* OR gender OR transgender OR transwoman OR transwomen OR (trans?feminine) OR (trans?female\*)) adj4 (hygien\* OR WASH OR water OR sanitation OR toilet OR soap OR latrine OR handwashing OR hand-washing)) OR (menstrual hygiene) OR (menstrual health) OR (period poverty) OR (menstrual adj2 management) OR (menstrual practice\*) OR (menstrual experience) OR (menstruation experience)

[Sexual and reproductive health aspect]

[((maternal mortality) OR (perinatal mortality) OR (maternal death) OR (maternal morbidity) OR (perinatal morbidity) OR (obstetric care) OR (antenatal care) OR (perinatal care) OR (sexually transmitted infection) OR STI OR (reproductive tract infection) OR RTI OR (reproductive rights) OR contraception OR contraceptive OR condom\* OR (family planning) OR (unintended pregnanc\*) OR (unwanted pregnanc\*) OR (teenage pregnanc\*) OR abortion OR (menstrual regulation) OR (sexual and reproductive health



|                               |                                                                                                                                                                                                                                                                                                                                                                                                                                                                                                                                        |
|-------------------------------|----------------------------------------------------------------------------------------------------------------------------------------------------------------------------------------------------------------------------------------------------------------------------------------------------------------------------------------------------------------------------------------------------------------------------------------------------------------------------------------------------------------------------------------|
|                               | OR SRH OR SRHR) OR ((sex* OR fertility OR contracept* OR reproducti* OR (family planning)) AND ((decision-making) OR (decision making) OR choice OR (informed-choice) OR (cohers*) OR (self efficacy) OR (self-efficacy) OR power)) OR ((sexu* OR reproducti*) AND (knowledge OR education)) OR ((birth OR delivery) AND ((skilled attend*) OR (skilled worker) OR (health personal) OR (health professional) OR (health care) OR (facility) OR (community health work*) OR CHW OR (skilled care) OR institutional)] NOT (HIV OR AIDS) |
| #3<br>[Women]                 | women OR woman OR girl* OR female* OR gender OR transgender OR transwoman OR transwomen OR (trans?feminine) OR (trans?female*) OR wife OR wives OR (sex disaggregated) OR (sex differences) OR maternal OR antenatal OR perinatal OR prenatal OR housewife OR housewives                                                                                                                                                                                                                                                               |
| #4<br>[Interventions]         | intervention* OR intervene OR policy OR policies OR response OR responses OR prevention* OR preventive OR strategy OR strategies OR program* OR service* OR evaluate OR evaluation* OR trial OR trials OR RCT OR impact OR kit OR toolkit OR effectiveness OR efficacy                                                                                                                                                                                                                                                                 |
| #1 AND #2<br>AND #3 AND<br>#4 |                                                                                                                                                                                                                                                                                                                                                                                                                                                                                                                                        |

## Preferred Reporting Items for Systematic reviews and Meta-Analyses extension for Scoping Reviews (PRISMA-ScR) Checklist

| SECTION                                               | ITEM | PRISMA-ScR CHECKLIST ITEM                                                                                                                                                                                                                                                                                  | REPORTED ON PAGE # |
|-------------------------------------------------------|------|------------------------------------------------------------------------------------------------------------------------------------------------------------------------------------------------------------------------------------------------------------------------------------------------------------|--------------------|
| <b>TITLE</b>                                          |      |                                                                                                                                                                                                                                                                                                            |                    |
| Title                                                 | 1    | Identify the report as a scoping review.                                                                                                                                                                                                                                                                   | 1                  |
| <b>ABSTRACT</b>                                       |      |                                                                                                                                                                                                                                                                                                            |                    |
| Structured summary                                    | 2    | Provide a structured summary that includes (as applicable): background, objectives, eligibility criteria, sources of evidence, charting methods, results, and conclusions that relate to the review questions and objectives.                                                                              | 2                  |
| <b>INTRODUCTION</b>                                   |      |                                                                                                                                                                                                                                                                                                            |                    |
| Rationale                                             | 3    | Describe the rationale for the review in the context of what is already known. Explain why the review questions/objectives lend themselves to a scoping review approach.                                                                                                                                   | 3-6                |
| Objectives                                            | 4    | Provide an explicit statement of the questions and objectives being addressed with reference to their key elements (e.g., population or participants, concepts, and context) or other relevant key elements used to conceptualize the review questions and/or objectives.                                  | 6                  |
| <b>METHODS</b>                                        |      |                                                                                                                                                                                                                                                                                                            |                    |
| Protocol and registration                             | 5    | Indicate whether a review protocol exists; state if and where it can be accessed (e.g., a Web address); and if available, provide registration information, including the registration number.                                                                                                             | 6                  |
| Eligibility criteria                                  | 6    | Specify characteristics of the sources of evidence used as eligibility criteria (e.g., years considered, language, and publication status), and provide a rationale.                                                                                                                                       | 7                  |
| Information sources*                                  | 7    | Describe all information sources in the search (e.g., databases with dates of coverage and contact with authors to identify additional sources), as well as the date the most recent search was executed.                                                                                                  | 6-7                |
| Search                                                | 8    | Present the full electronic search strategy for at least 1 database, including any limits used, such that it could be repeated.                                                                                                                                                                            | Appendix           |
| Selection of sources of evidence†                     | 9    | State the process for selecting sources of evidence (i.e., screening and eligibility) included in the scoping review.                                                                                                                                                                                      | 8                  |
| Data charting process‡                                | 10   | Describe the methods of charting data from the included sources of evidence (e.g., calibrated forms or forms that have been tested by the team before their use, and whether data charting was done independently or in duplicate) and any processes for obtaining and confirming data from investigators. | 8-9                |
| Data items                                            | 11   | List and define all variables for which data were sought and any assumptions and simplifications made.                                                                                                                                                                                                     | 8                  |
| Critical appraisal of individual sources of evidence§ | 12   | If done, provide a rationale for conducting a critical appraisal of included sources of evidence; describe the methods used and how this information was used in any data synthesis (if appropriate).                                                                                                      | 9                  |

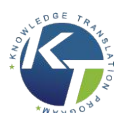

| SECTION                                       | ITEM | PRISMA-ScR CHECKLIST ITEM                                                                                                                                                                       | REPORTED ON PAGE # |
|-----------------------------------------------|------|-------------------------------------------------------------------------------------------------------------------------------------------------------------------------------------------------|--------------------|
| Synthesis of results                          | 13   | Describe the methods of handling and summarizing the data that were charted.                                                                                                                    | 9                  |
| <b>RESULTS</b>                                |      |                                                                                                                                                                                                 |                    |
| Selection of sources of evidence              | 14   | Give numbers of sources of evidence screened, assessed for eligibility, and included in the review, with reasons for exclusions at each stage, ideally using a flow diagram.                    | 10                 |
| Characteristics of sources of evidence        | 15   | For each source of evidence, present characteristics for which data were charted and provide the citations.                                                                                     | 10ff               |
| Critical appraisal within sources of evidence | 16   | If done, present data on critical appraisal of included sources of evidence (see item 12).                                                                                                      | 18-19              |
| Results of individual sources of evidence     | 17   | For each included source of evidence, present the relevant data that were charted that relate to the review questions and objectives.                                                           | 10ff               |
| Synthesis of results                          | 18   | Summarize and/or present the charting results as they relate to the review questions and objectives.                                                                                            | Figures 1-4        |
| <b>DISCUSSION</b>                             |      |                                                                                                                                                                                                 |                    |
| Summary of evidence                           | 19   | Summarize the main results (including an overview of concepts, themes, and types of evidence available), link to the review questions and objectives, and consider the relevance to key groups. | 19-22              |
| Limitations                                   | 20   | Discuss the limitations of the scoping review process.                                                                                                                                          | 22-23              |
| Conclusions                                   | 21   | Provide a general interpretation of the results with respect to the review questions and objectives, as well as potential implications and/or next steps.                                       | 23                 |
| <b>FUNDING</b>                                |      |                                                                                                                                                                                                 |                    |
| Funding                                       | 22   | Describe sources of funding for the included sources of evidence, as well as sources of funding for the scoping review. Describe the role of the funders of the scoping review.                 | 23                 |

JBI = Joanna Briggs Institute; PRISMA-ScR = Preferred Reporting Items for Systematic reviews and Meta-Analyses extension for Scoping Reviews.

\* Where *sources of evidence* (see second footnote) are compiled from, such as bibliographic databases, social media platforms, and Web sites.

† A more inclusive/heterogeneous term used to account for the different types of evidence or data sources (e.g., quantitative and/or qualitative research, expert opinion, and policy documents) that may be eligible in a scoping review as opposed to only studies. This is not to be confused with *information sources* (see first footnote).

‡ The frameworks by Arksey and O'Malley (6) and Levac and colleagues (7) and the JBI guidance (4, 5) refer to the process of data extraction in a scoping review as data charting.

§ The process of systematically examining research evidence to assess its validity, results, and relevance before using it to inform a decision. This term is used for items 12 and 19 instead of "risk of bias" (which is more applicable to systematic reviews of interventions) to include and acknowledge the various sources of evidence that may be used in a scoping review (e.g., quantitative and/or qualitative research, expert opinion, and policy document).

From: Tricco AC, Lillie E, Zarin W, O'Brien KK, Colquhoun H, Levac D, et al. PRISMA Extension for Scoping Reviews (PRISMA-ScR): Checklist and Explanation. *Ann Intern Med.* 2018;169:467–473. doi: 10.7326/M18-0850.

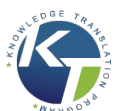

St. Michael's

Inspired Care.  
Inspiring Science.

For peer review only - <http://bmjopen.bmj.com/site/about/guidelines.xhtml>
