# Supplementary material for: Response strategies for promoting gender equality in public health emergencies: a rapid scoping review
Source: PubMed Central journal article supplement — BMJ Open. 2021 Aug 11;11(8):e048292. doi: 10.1136/bmjopen-2020-048292 (PMC8361708; doi:10.1136/bmjopen-2020-048292), 2021-08-11
Supplement: bmjopen-2020-048292supp001.pdf [file bmjopen-2020-048292supp001.pdf]

## Appendix

Table A1. Search String (MEDLINE)

|                                                                 |                                                                                                                                                                                                                                                                                                                                                                                                                                                                                                                                                                                                                                                                                                                                                                                                                                                                                                                                                                                                                                                                                                                                                                                                                                                                                                                                                                                                                                                                                                            |
|-----------------------------------------------------------------|------------------------------------------------------------------------------------------------------------------------------------------------------------------------------------------------------------------------------------------------------------------------------------------------------------------------------------------------------------------------------------------------------------------------------------------------------------------------------------------------------------------------------------------------------------------------------------------------------------------------------------------------------------------------------------------------------------------------------------------------------------------------------------------------------------------------------------------------------------------------------------------------------------------------------------------------------------------------------------------------------------------------------------------------------------------------------------------------------------------------------------------------------------------------------------------------------------------------------------------------------------------------------------------------------------------------------------------------------------------------------------------------------------------------------------------------------------------------------------------------------------|
| <p>#1<br/>[public health emergencies and response measures]</p> | <p>pandemic* OR epidemic* OR (disease adj2 outbreak*) OR (disease adj2 transmission) OR (public health adj2 emergenc*) OR (public health adj2 disaster*) OR (humanitarian adj2 emergenc*) OR (humanitarian adj2 disaster*) OR (catastrophic event*) OR (humanitarian adj2 catastroph*) OR (public health adj2 catastroph*) OR (natural adj2 disaster*) OR (disaster adj2 victim*) OR (natural adj2 hazard) OR (natural adj2 catastroph*) OR tsunami* OR earthquake* OR flood* OR hurricane* OR cyclone* OR tornado* OR avalanche OR cyclone* OR typhoon* OR monsoon* OR landslide* OR volcanic eruption OR draught* OR famine* OR (crop failure) OR (crop shortfall*) OR (crop shortage*) OR infestation* OR (severe acute respiratory syndrome) OR SARS OR (swine flu) OR H1N1 OR polio OR ebola OR zika OR (Middle Eastern Respiratory Syndrome) OR MERS OR MERS-CoV OR coronavirus OR Corona OR COVID-19 OR SARS-CoV-2 OR 2019-nCoV OR Ebola OR ebolavirus OR EVD OR cholera OR chikungunya OR (Crimean-Congo haemorrhagic fever) OR influenza OR (Lassa fever) OR (Marburg virus disease) OR meningitis OR monkeypox OR (Nipah virus infection) OR (Nipah virus) OR plague OR (rift valley fever) OR (rift valley adj2 disease) OR tularemia OR (yellow fever) OR quarantine* OR (social isolation) OR (physical isolation) OR (social distanc*) OR (physical distanc*) OR (shelter in place) OR lockdown* OR shutdown*</p>                                                                            |
| <p>#2 [Outcomes]</p>                                            | <p>[Discrimination aspect]</p> <p>sexism OR ((women OR woman OR girl* OR female* OR gender OR transgender OR transwoman OR transwomen OR (trans?feminine) OR (trans?female*) OR sex*) adj6 (inequalit* OR equalit* OR inequit* OR equit* OR discriminat* OR bias OR (differential treatment) OR (preferential treatment) OR disadvantage OR prejudic*)) OR (gender adj4 (norm OR norms OR normative OR attitude* OR belief*))</p> <p>[Violence aspect]</p> <p>GBV OR VAW OR VAWG OR IPV OR ((women OR woman OR girl* OR female* OR gender OR transgender OR transwoman OR transwomen OR (trans?feminine) OR (trans?female*) OR wife OR wives OR husband* OR dating OR partner* OR relationship OR family OR married OR marriage OR domestic OR sex*) adj6 (violence OR violent OR abuse OR abusive OR victim* OR harass* OR assault* OR maltreat* OR aggress* OR batter* OR beat* OR hit* OR homicide* OR murder* OR injury OR injuries OR (coercive control) OR (controlling behaviour) OR (controlling behavior) OR rape OR traffick* OR exploit* OR safety OR danger OR fear)) OR (force* adj2 sex) OR (coerc* adj2 sex) OR (unwanted adj2 sex) OR rape OR raped OR rapes OR raping</p> <p>[Harmful practices aspect]</p> <p>(child bride) OR childbride OR (child marriage) OR (underage* marriage) OR (under age marriage) OR (forced marriage) OR (early marriage) OR (adolescent marriage) OR (female genital mutilation) OR (female genital cutting) OR FGM OR FGC</p> <p>[Unpaid Work aspect]</p> |

|                                                                                                                                                                                                                                                                                                                                                                                                                                                                                                                                                                                                                                                                                                                                                                                                                                                                                                                                                                                                                                                                                                                                                                                                                                                                                                                                                                                                                                                                                                                                                                                                                                                                                                                                                                                                                                                                                                                                                                                                                                                                                                                                                                                                                                                                                                                                                                                                                                                                                                                                                                                                                                                                                                                                                                                                                                                                                                                                                                                                    |
|----------------------------------------------------------------------------------------------------------------------------------------------------------------------------------------------------------------------------------------------------------------------------------------------------------------------------------------------------------------------------------------------------------------------------------------------------------------------------------------------------------------------------------------------------------------------------------------------------------------------------------------------------------------------------------------------------------------------------------------------------------------------------------------------------------------------------------------------------------------------------------------------------------------------------------------------------------------------------------------------------------------------------------------------------------------------------------------------------------------------------------------------------------------------------------------------------------------------------------------------------------------------------------------------------------------------------------------------------------------------------------------------------------------------------------------------------------------------------------------------------------------------------------------------------------------------------------------------------------------------------------------------------------------------------------------------------------------------------------------------------------------------------------------------------------------------------------------------------------------------------------------------------------------------------------------------------------------------------------------------------------------------------------------------------------------------------------------------------------------------------------------------------------------------------------------------------------------------------------------------------------------------------------------------------------------------------------------------------------------------------------------------------------------------------------------------------------------------------------------------------------------------------------------------------------------------------------------------------------------------------------------------------------------------------------------------------------------------------------------------------------------------------------------------------------------------------------------------------------------------------------------------------------------------------------------------------------------------------------------------------|
| <p>(care burden) OR (child care) OR childcare OR (unpaid work) OR (time allocation) OR (house work) OR housework OR (domestic work) OR (domestic chore*) OR homemaker*</p> <p>[Equal opportunities aspect] (women OR woman OR girl* OR female* OR gender OR transgender OR transwoman OR transwomen OR (trans?feminine) OR (trans?female*)) adj6 [(empower* OR agency OR emancipat* OR vote OR voting OR (social capital) OR school* OR education* OR grade retention OR cognitive development OR literacy OR numeracy) OR ((political OR society OR societal OR community OR communities OR equal* OR equit* OR household OR organization* OR business*) adj3 (participation OR (decision making) OR (decision-making) OR represent* OR leader* OR influence OR opportunit* OR manage*))]</p> <p>[Economic participation aspect]</p> <p>((women OR woman OR girl* OR female* OR gender OR transgender OR transwoman OR transwomen OR (trans?feminine) OR (trans?female*)) adj4 ((labo?r market) OR employ* OR unemploy* OR (work) OR (job) OR (labo?r protection) OR (labo?r supply) OR income* OR earning* OR wage* OR salary OR salarie* OR asset* OR expenditure* OR consumption OR saving* OR credit OR (financial inclusion) OR (account holder) OR (account ownership) OR entrepreneurship)) OR (wage gap) OR (salary gap) OR (pay gap)</p> <p>[ICT aspect]</p> <p>(women OR woman OR girl* OR female* OR gender OR transgender OR transwoman OR transwomen OR (trans?feminine) OR (trans?female*)) adj6 ((information AND communication) OR (information technology) OR (communication technology) OR (IT skills) OR (Internet access) OR ICT OR (SIM card) OR (mobile phone) OR (cell* phone) OR (phone subscription) OR (phone network) OR radio OR television OR telephone OR (local area network) OR LAN OR extranet OR (World Wide Web) OR (mobile money) OR (mobile banking) OR computing OR e-commerce OR (enabling technology) OR technolog*)</p> <p>[WASH aspect]</p> <p>((women OR woman OR girl* OR female* OR gender OR transgender OR transwoman OR transwomen OR (trans?feminine) OR (trans?female*)) adj4 (hygien* OR WASH OR water OR sanitation OR toilet OR soap OR latrine OR handwashing OR hand-washing)) OR (menstrual hygiene) OR (menstrual health) OR (period poverty) OR (menstrual adj2 management) OR (menstrual practice*) OR (menstrual experience) OR (menstruation experience)</p> <p>[Sexual and reproductive health aspect]</p> <p>(((maternal mortality) OR (perinatal mortality) OR (maternal death) OR (maternal morbidity) OR (perinatal morbidity) OR (obstetric care) OR (antenatal care) OR (perinatal care) OR (sexually transmitted infection) OR STI OR (reproductive tract infection) OR RTI OR (reproductive rights) OR contraception OR contraceptive OR condom* OR (family planning) OR (unintended pregnanc*) OR (unwanted pregnanc*) OR (teenage pregnanc*) OR abortion OR (menstrual regulation) OR (sexual and reproductive health</p> |
|----------------------------------------------------------------------------------------------------------------------------------------------------------------------------------------------------------------------------------------------------------------------------------------------------------------------------------------------------------------------------------------------------------------------------------------------------------------------------------------------------------------------------------------------------------------------------------------------------------------------------------------------------------------------------------------------------------------------------------------------------------------------------------------------------------------------------------------------------------------------------------------------------------------------------------------------------------------------------------------------------------------------------------------------------------------------------------------------------------------------------------------------------------------------------------------------------------------------------------------------------------------------------------------------------------------------------------------------------------------------------------------------------------------------------------------------------------------------------------------------------------------------------------------------------------------------------------------------------------------------------------------------------------------------------------------------------------------------------------------------------------------------------------------------------------------------------------------------------------------------------------------------------------------------------------------------------------------------------------------------------------------------------------------------------------------------------------------------------------------------------------------------------------------------------------------------------------------------------------------------------------------------------------------------------------------------------------------------------------------------------------------------------------------------------------------------------------------------------------------------------------------------------------------------------------------------------------------------------------------------------------------------------------------------------------------------------------------------------------------------------------------------------------------------------------------------------------------------------------------------------------------------------------------------------------------------------------------------------------------------------|

|                               |                                                                                                                                                                                                                                                                                                                                                                                                                                                                                                                                        |
|-------------------------------|----------------------------------------------------------------------------------------------------------------------------------------------------------------------------------------------------------------------------------------------------------------------------------------------------------------------------------------------------------------------------------------------------------------------------------------------------------------------------------------------------------------------------------------|
|                               | OR SRH OR SRHR) OR ((sex* OR fertility OR contracept* OR reproducti* OR (family planning)) AND ((decision-making) OR (decision making) OR choice OR (informed-choice) OR (cohers*) OR (self efficacy) OR (self-efficacy) OR power)) OR ((sexu* OR reproducti*) AND (knowledge OR education)) OR ((birth OR delivery) AND ((skilled attend*) OR (skilled worker) OR (health personal) OR (health professional) OR (health care) OR (facility) OR (community health work*) OR CHW OR (skilled care) OR institutional)) NOT (HIV OR AIDS) |
| #3<br>[Women]                 | women OR woman OR girl* OR female* OR gender OR transgender OR transwoman OR transwomen OR (trans?feminine) OR (trans?female*) OR wife OR wives OR (sex disaggregated) OR (sex differences) OR maternal OR antenatal OR perinatal OR prenatal OR housewife OR housewives                                                                                                                                                                                                                                                               |
| #4<br>[Interventions]         | intervention* OR intervene OR policy OR policies OR response OR responses OR prevention* OR preventive OR strategy OR strategies OR program* OR service* OR evaluate OR evaluation* OR trial OR trials OR RCT OR impact OR kit OR toolkit OR effectiveness OR efficacy                                                                                                                                                                                                                                                                 |
| #1 AND #2<br>AND #3 AND<br>#4 |                                                                                                                                                                                                                                                                                                                                                                                                                                                                                                                                        |
